# Supplementary material for: An enzyme-mimic single Fe-N3 atom catalyst for the oxidative synthesis of nitriles via C─C bond cleavage strategy
Source: PubMed Central journal article supplement — Sci Adv. 2022 Oct 7;8(40):eadd1267. doi: 10.1126/sciadv.add1267 (PMC9544340; doi:10.1126/sciadv.add1267), 2022-10-07

Supplementary Materials for  
**An enzyme-mimic single Fe-N<sub>3</sub> atom catalyst for the oxidative synthesis of nitriles via C–C bond cleavage strategy**

Jingzhong Qin *et al.*

Corresponding author: Wen Dai, [daiwen@dicp.ac.cn](mailto:daiwen@dicp.ac.cn); Zehui Zhang, [zehuizh@mail.ustc.edu.cn](mailto:zehuizh@mail.ustc.edu.cn)

*Sci. Adv.* **8**, eadd1267 (2022)  
DOI: 10.1126/sciadv.add1267

**This PDF file includes:**

Figs. S1 to S22

Tables S1 to S15

Supplementary NMR data

Supplementary mass spectrometry and NMR spectrometry

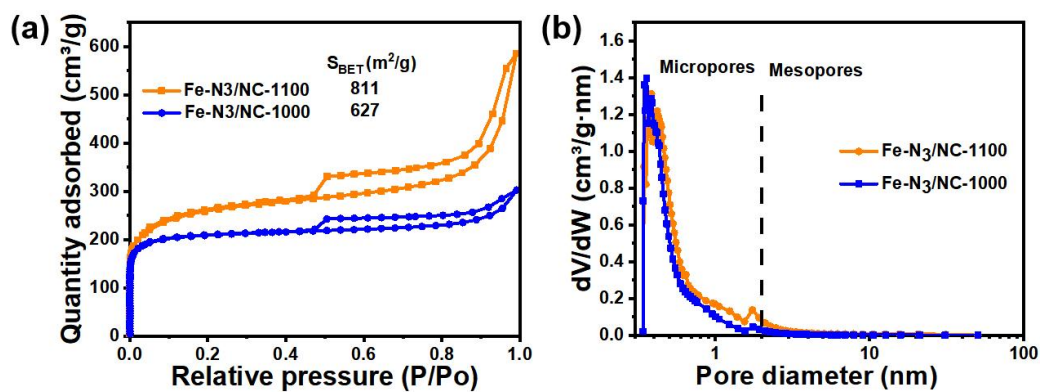

**Fig. S1. Characterization of the surface area of the catalyst by nitrogen physisorption measurements.** Nitrogen adsorption-desorption isotherms **(a)** and pore size distribution **(b)** of the Fe catalysts.

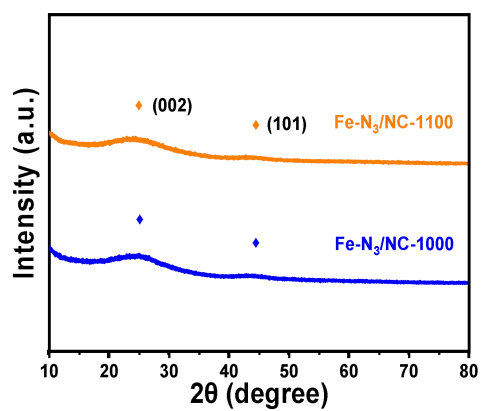

**Fig. S2. XRD patterns of the as-prepared Fe catalysts.** XRD patterns of Fe-N<sub>3</sub>/NC-1100 also gave no diffraction peaks of Fe species, but showed two weak peaks at 24.4° and 44.6°, assigning to the (002) and (101) planes of graphitic carbon.

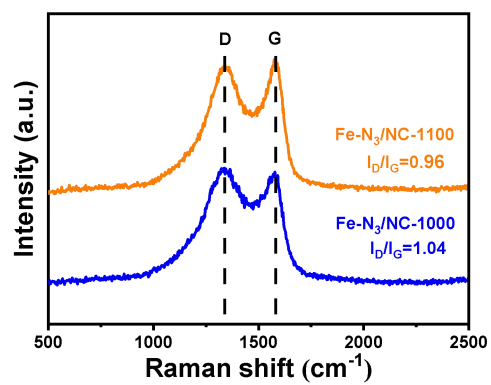

**Fig. S3. Raman spectra of the as-prepared Fe catalysts.** Two peaks with the Raman shifts around 1350 (called D band) and 1570 cm<sup>-1</sup> (called G band) were observed.

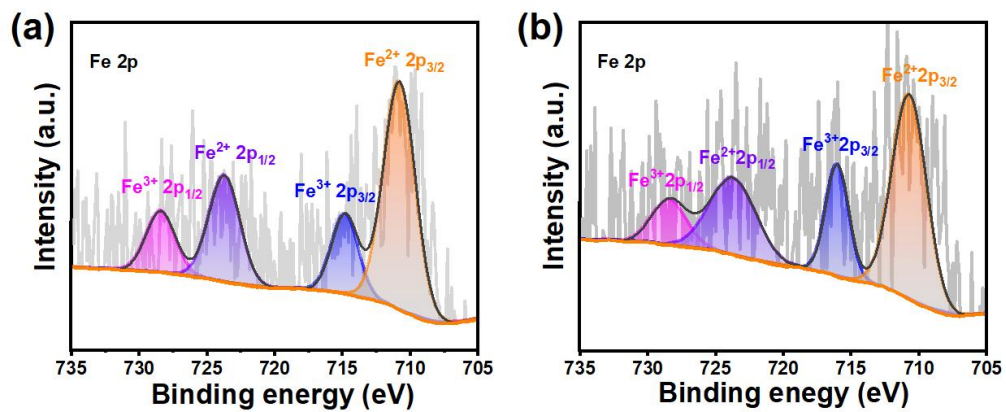

**Fig. S4.** Fe 2p XPS spectra of the as-prepared Fe catalysts. (a) Fe-N<sub>3</sub>/NC-1100; (b) Fe-N<sub>3</sub>/NC-1000.

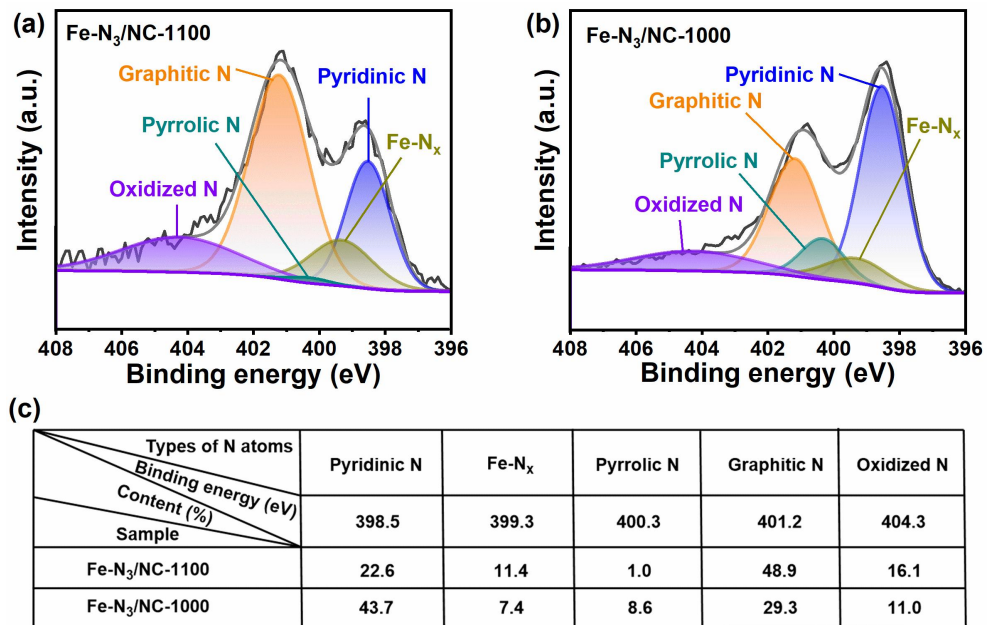

**Fig. S5.** N 1s XPS spectra and content of the as-prepared Fe catalysts. (a)  $\text{Fe-N}_3/\text{NC-1100}$ ; (b)  $\text{Fe-N}_3/\text{NC-1000}$ ; (c) Content of types of N atoms.

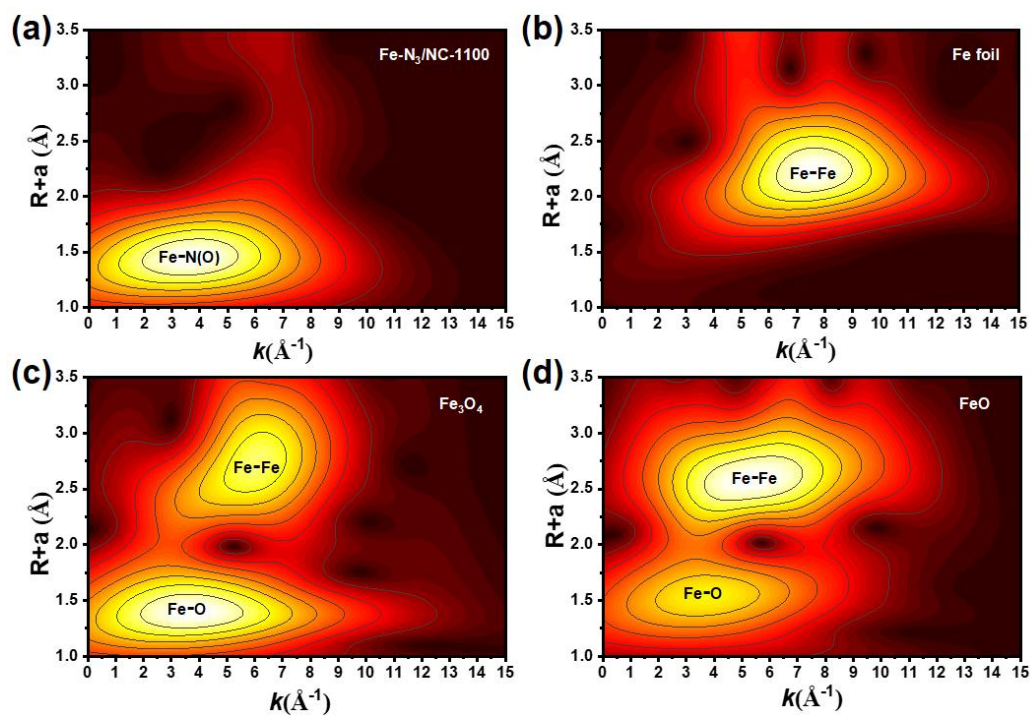

**Fig. S6. Wavelet-transformed  $k^3$ -weighted EXAFS spectra. (a) Fe-N<sub>3</sub>/NC-1100; (b) Fe foil; (c) Fe<sub>3</sub>O<sub>4</sub>; (d) FeO.**

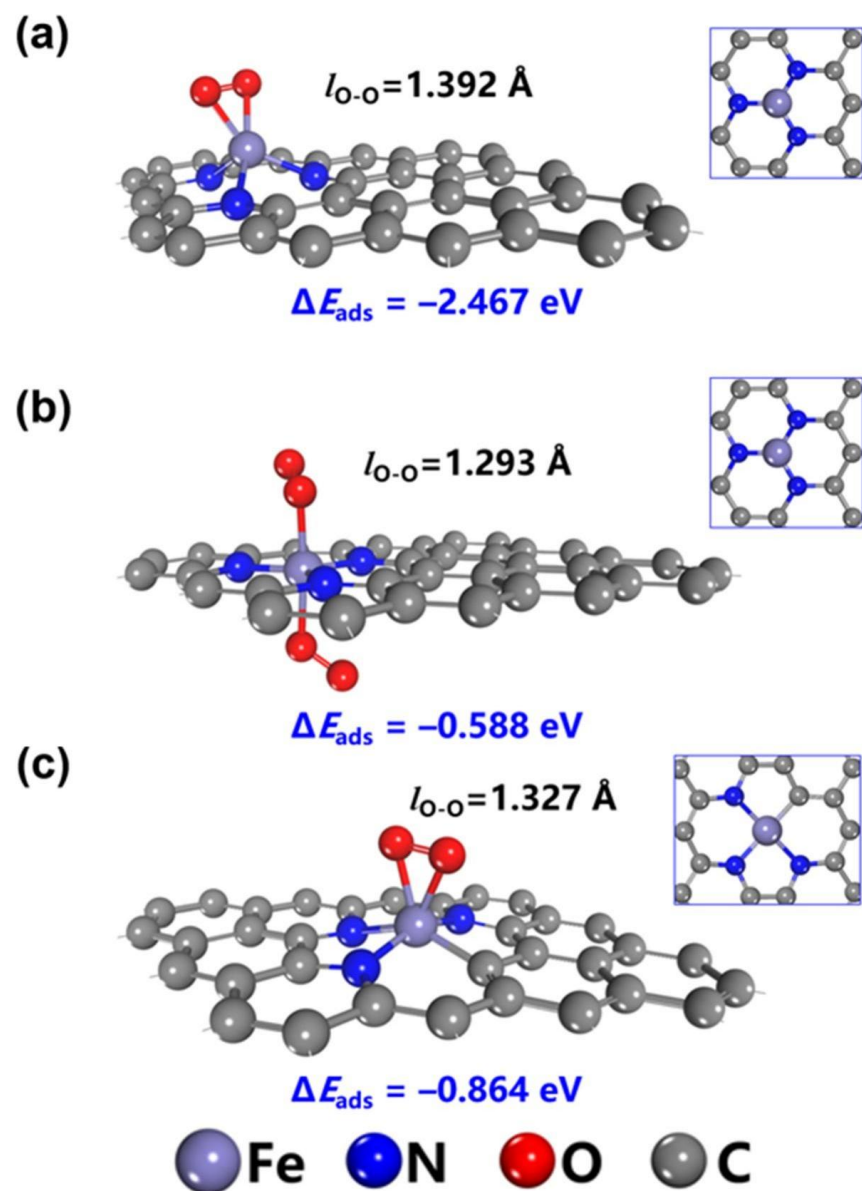

Fig. S7. The possible structures of Fe-N<sub>3</sub>/NC-1100 were further studied by DFT calculation.



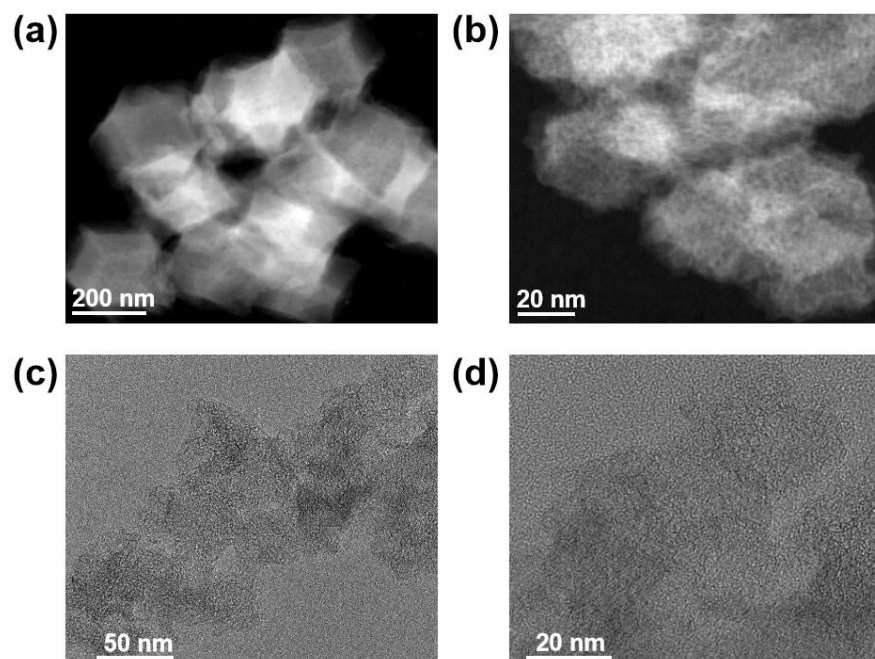

**Fig. S8. STEM images of the Fe-N<sub>3</sub>/NC-1000 catalyst. (a~b) SEM; (c~d) TEM.**

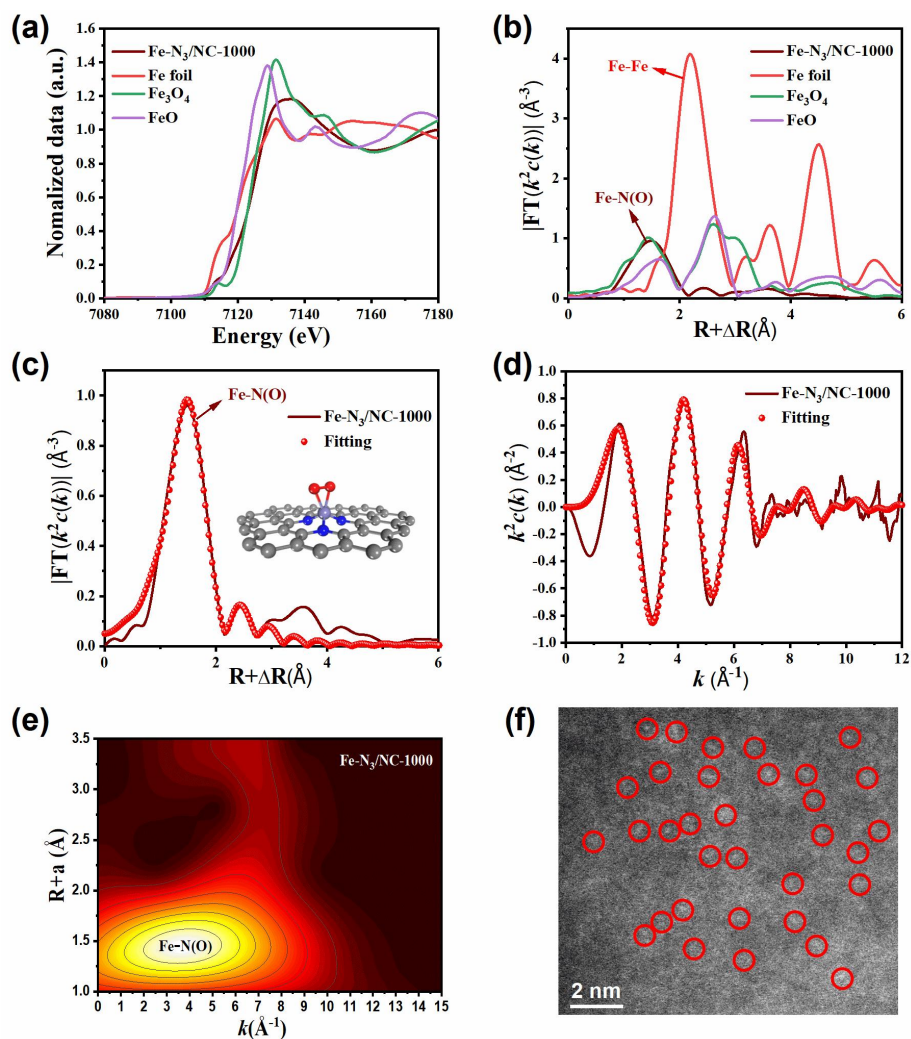

**Fig. S9. Characterization of the Fe-N<sub>3</sub>/NC-1000 catalyst.** (a) XANES spectra at the Fe K-edge; (b) FT-EXAFS spectra of the Fe foil, Fe<sub>3</sub>O<sub>4</sub>, FeO and Fe-N<sub>3</sub>/NC-1000; (c) R space and (d) k space of Fe-N<sub>3</sub>/NC-1000; (e) Wavelet-transformed  $k^3$ -weighted EXAFS spectra of Fe-N<sub>3</sub>/NC-1000; (f) HAADF-STEM image of Fe-N<sub>3</sub>/NC-1000 (single-atom Fe is highlighted with red circles).

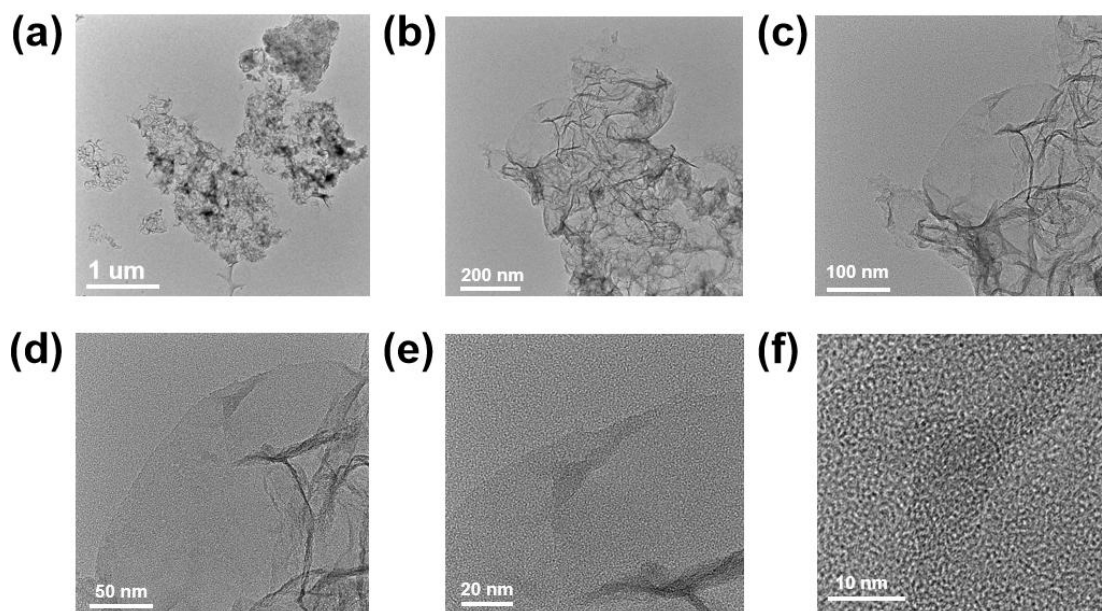

**Fig. S10. STEM images of the Fe-N<sub>4</sub>/NC-800 catalyst. (a~d) STEM images of Fe-N<sub>4</sub>/NC-800; (e~f) HRTEM images of Fe-N<sub>4</sub>/NC-800.**

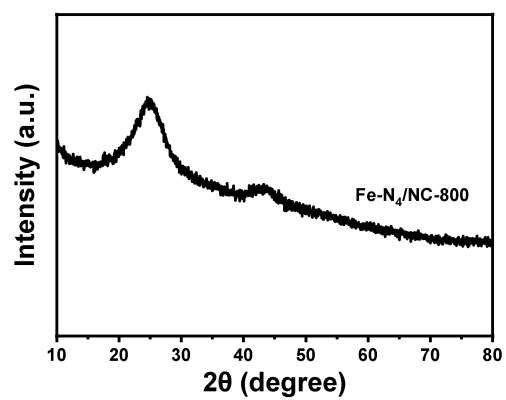

**Fig. S11. XRD patterns of the Fe-N<sub>4</sub>/NC-800 catalyst.** XRD patterns of Fe-N<sub>4</sub>/NC-800 also gave no diffraction peaks of Fe species, but showed two weak peaks at 25.4° and 43.6°.

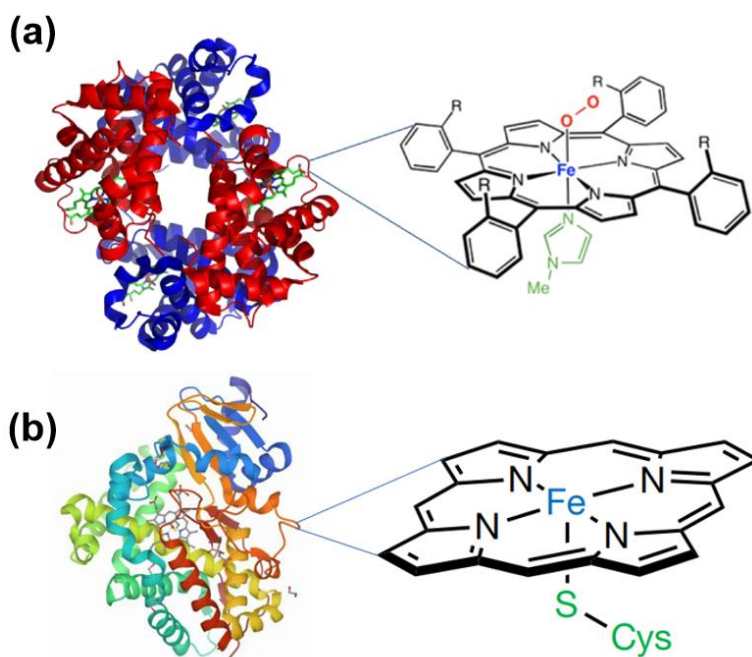

**Fig. S12. The structure of the hemoglobin molecule and cytochrome P450 in organism. (a) hemoglobin molecule; (b) cytochrome P450.**

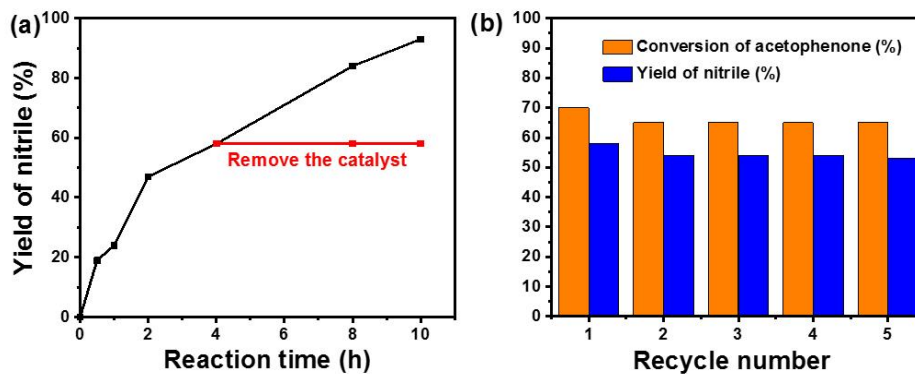

**Fig. S13. The recycling test of the Fe-N<sub>3</sub>/NC-1100 catalyst.** (a) Time-yield plots over Fe-N<sub>3</sub>/NC-1100 (black line) or removing Fe-N<sub>3</sub>/NC-1100 after 4 h (red line); (b) Recycling experiment of the oxidative transformation of acetophenone into benzonitrile. Reaction conditions: Acetophenone (0.20 mmol), toluene (1.5 mL), Fe-N<sub>3</sub>/NC-1100 (20 mg, 0.93 mmol %), NH<sub>3</sub>·H<sub>2</sub>O (26.5 wt.% 400 μL), 150 °C, O<sub>2</sub> (10 bar) and 4 h.

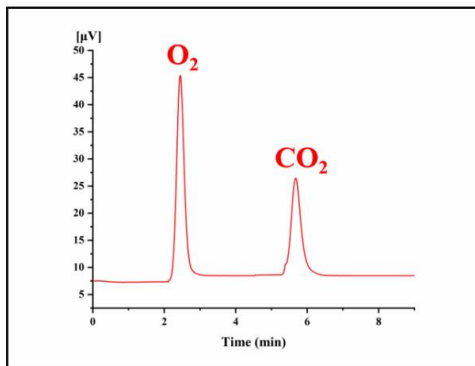

**Fig. S14. CO<sub>2</sub> was detected by mass spectrometry.**

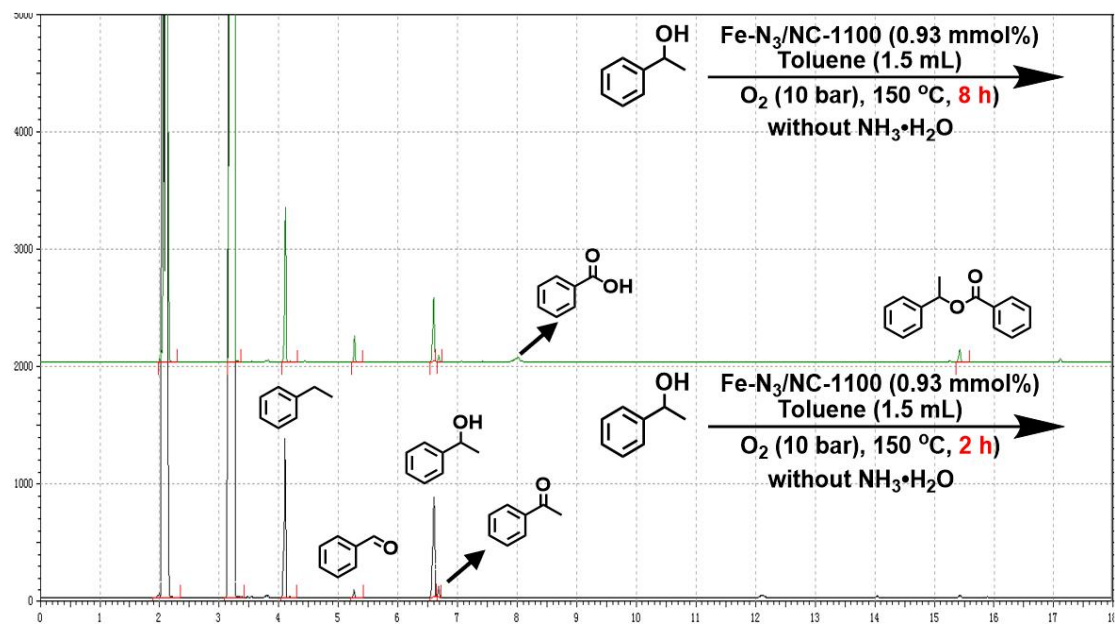

**Fig. S15. GC spectrum of the intermediate generated from the aerobic oxidation cleavage and functionalization of DL-1-phenethylalcohol in toluene.**



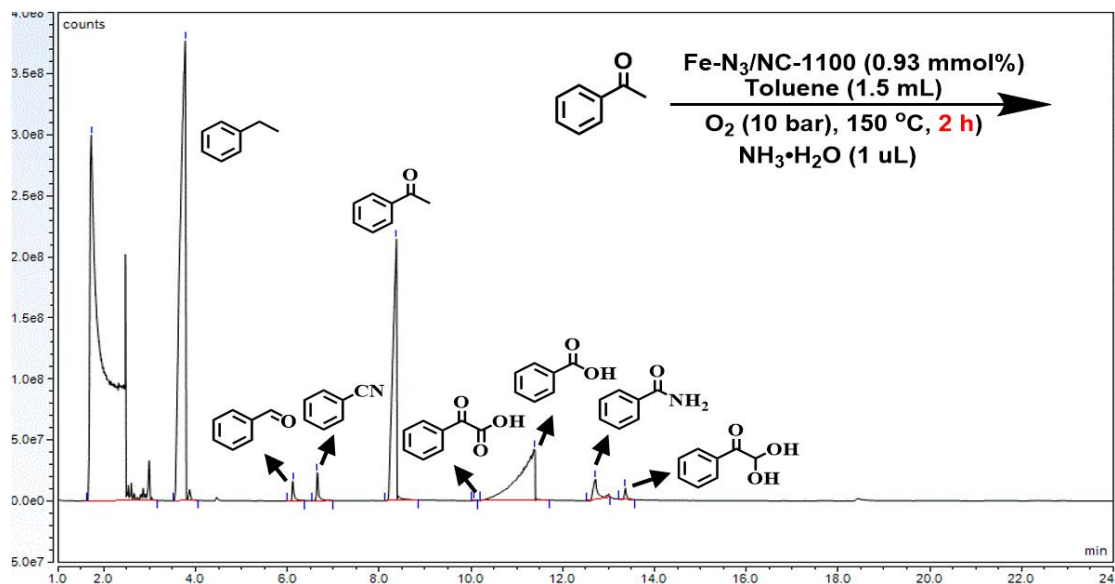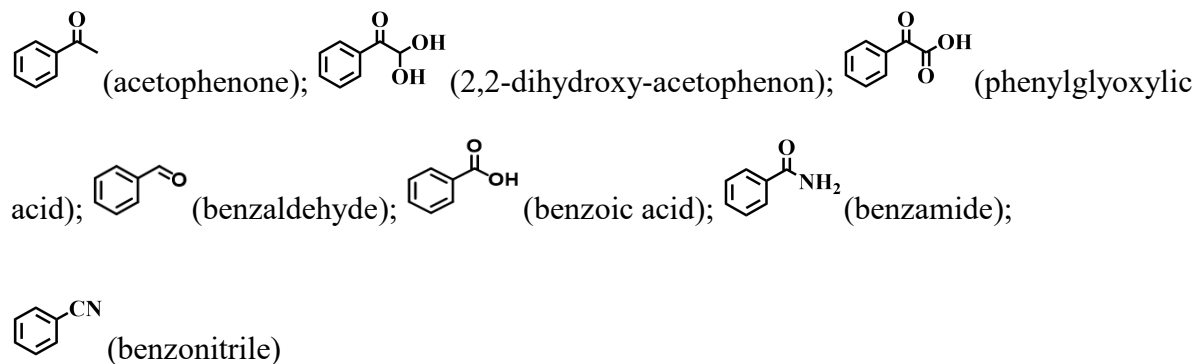

**Fig. S16.** GC-MS spectrum of the intermediate generated from the aerobic oxidation cleavage and functionalization of acetophenone in toluene.

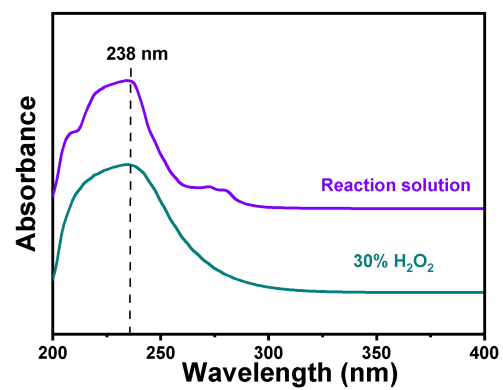

**Fig. S17. Detection of H<sub>2</sub>O<sub>2</sub>.** UV/visible spectrophotometer of 30% H<sub>2</sub>O<sub>2</sub> solution and solution after reaction in methanol.

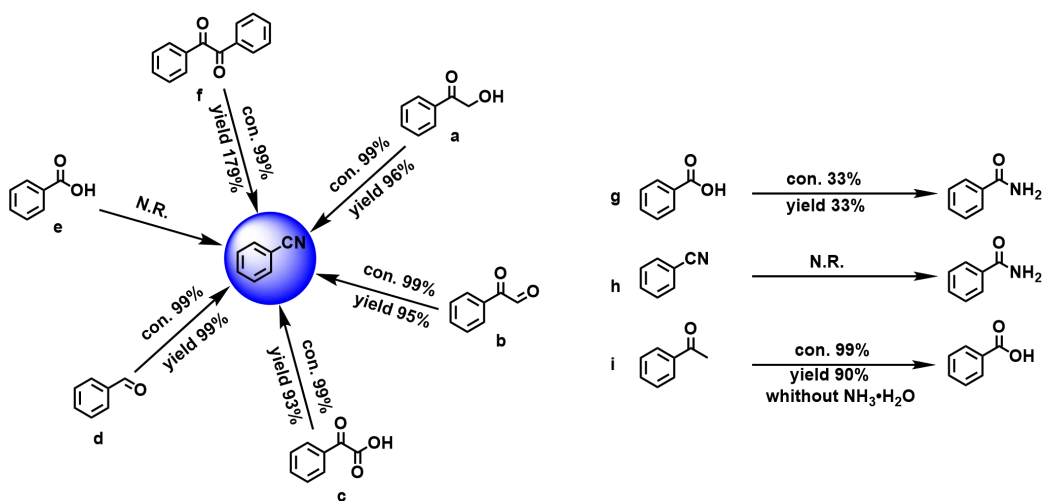

**Fig. S18. Some important intermediates for the synthesis of benzonitrile.** Reaction conditions: Substrate (0.20 mmol), Fe-N<sub>3</sub>/NC-1100 (20 mg 0.98 mmol%), NH<sub>3</sub>•H<sub>2</sub>O (26.5 wt.% 400  $\mu$ L), toluene (1.5 mL), O<sub>2</sub> (10 bar), 150  $^{\circ}$ C and 10 h.

**A. Successive cleavage and ammoxidation of mixed aromatic-alkyl ketones in a one-pot reaction**

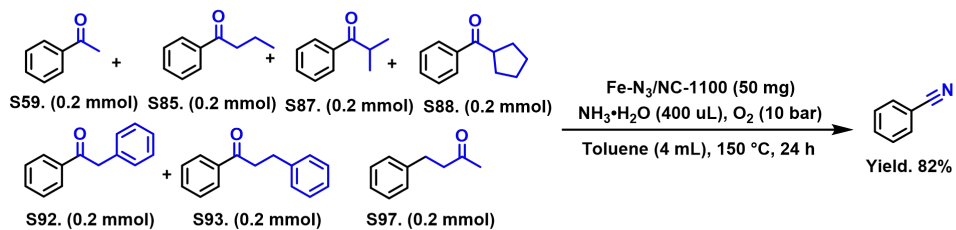

**B. Effective functionalization of complex bioactive molecules into nitrile**

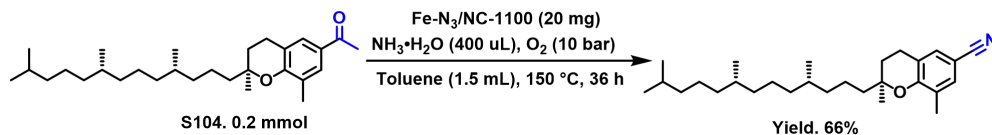

**Fig. S19. Practical applications of developed catalytic methods.**

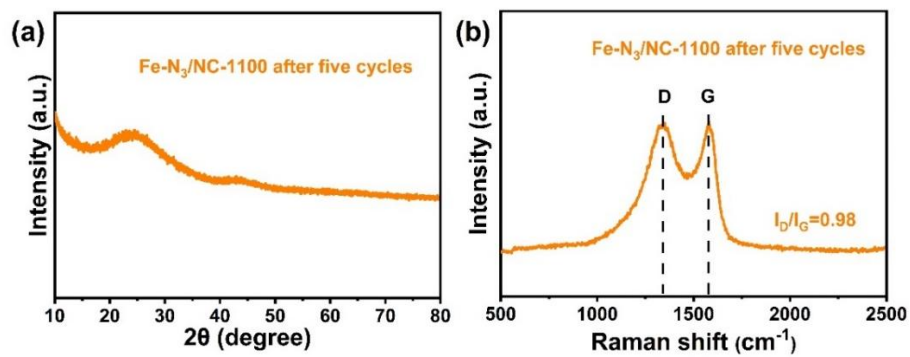

Fig. S20. XRD and Raman patterns of Fe-N<sub>3</sub>/NC-1100 after five large-scale cycles. (a) XRD; (b) Raman.

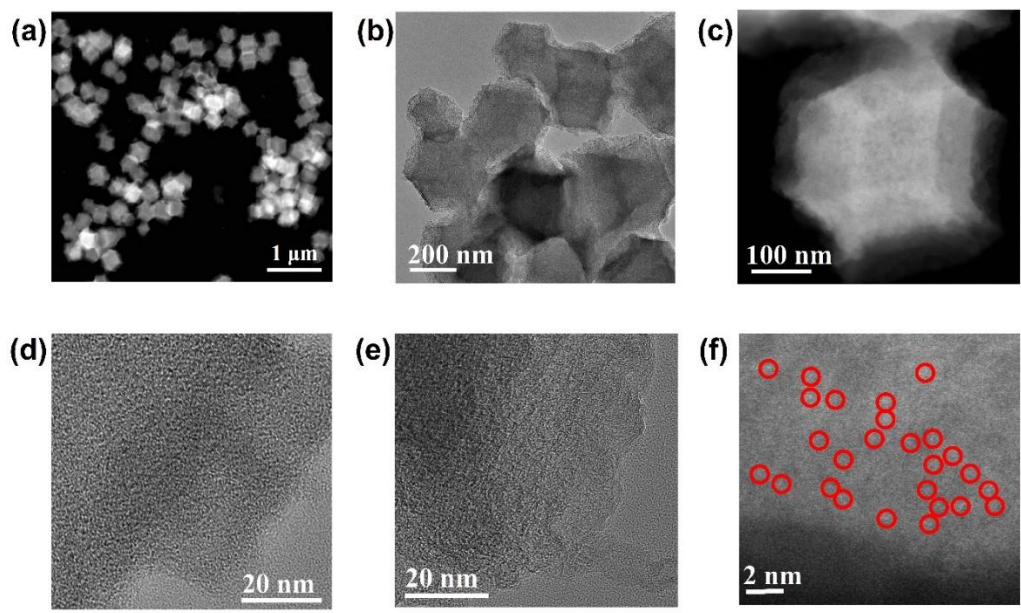

**Fig. S21. STEM images of the Fe-N<sub>3</sub>/NC-1100 after five large-scale cycles. (a~e) STEM images; (f) HAADF-STEM image (single-atom Fe is highlighted with red circles).**

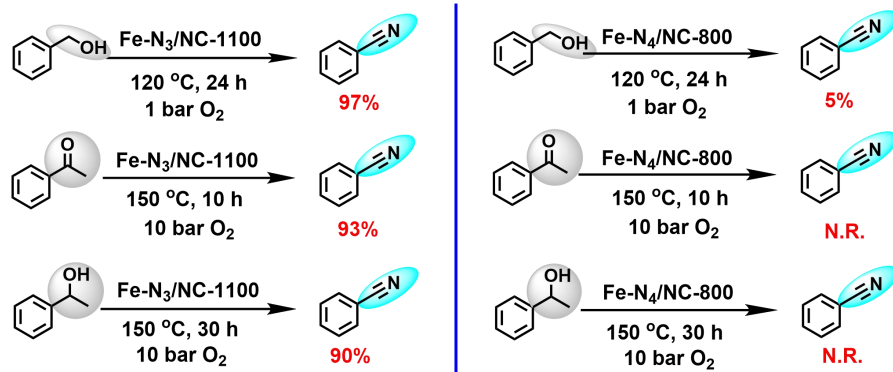

Reaction conditions: substrates (0.20 mmol), catalyst (20 mg),  $\text{NH}_3 \cdot \text{H}_2\text{O}$  (26.5 wt.%, 400  $\mu\text{L}$ ), toluene (1.5 mL).

**Fig. S22.** Comparison of catalytic activity of  $\text{Fe-N}_3/\text{NC-1100}$  and  $\text{Fe-N}_4/\text{NC-800}$ .

**Table S1. Texture properties and elements content in the Fe catalysts.**

| Sample                     | S <sub>BET</sub><br>(m <sup>2</sup> /g) | Pore Volume<br>(cm <sup>3</sup> /g) | Pore Size<br>(nm) | Content                |                        |
|----------------------------|-----------------------------------------|-------------------------------------|-------------------|------------------------|------------------------|
|                            |                                         |                                     |                   | Fe (wt.%) <sup>a</sup> | Zn (wt.%) <sup>a</sup> |
| Fe-N <sub>3</sub> /NC-1100 | 811                                     | 0.67                                | 3.3               | 0.52                   | 0.05                   |
| Fe-N <sub>3</sub> /NC-1000 | 627                                     | 0.40                                | 2.6               | 0.76                   | 0.54                   |

<sup>a</sup> Measured by ICP-AES.



**Table S2. Elements content in the Fe catalysts. <sup>a</sup>**

| Sample                     | C (at.%) | N (at.%) | O (at.%) | Fe (at.%) | Zn (at.%) |
|----------------------------|----------|----------|----------|-----------|-----------|
| Fe-N <sub>3</sub> /NC-1100 | 89.67    | 1.71     | 8.42     | 0.2       | 0         |
| Fe-N <sub>3</sub> /NC-1000 | 87.45    | 5.46     | 6.08     | 0         | 1.01      |

<sup>a</sup> Measured by XPS.

**Table S3. EXAFS fitting parameters at the Fe K-edge for various samples ( $S_0^2=0.811$ ).**

| Sample                         | Shell | CN <sup>a</sup> | R(Å) <sup>b</sup> | $\sigma^2(\text{Å}^2)$ <sup>c</sup> | $\Delta E_0(\text{eV})$ <sub>d</sub> | R factor |
|--------------------------------|-------|-----------------|-------------------|-------------------------------------|--------------------------------------|----------|
| <i>Fe K-edge</i>               |       |                 |                   |                                     |                                      |          |
| Fe foil                        | Fe-Fe | 8*              | 2.46±0.01         | 0.0048                              | 5.8                                  | 0.0055   |
|                                | Fe-Fe | 6*              | 2.85±0.01         | 0.0055                              |                                      |          |
| FeO                            | Fe-O  | 6.0             | 2.12±0.01         | 0.0147                              | -2.2                                 | 0.0074   |
|                                | Fe-Fe | 12.0            | 3.07±0.01         | 0.0119                              |                                      |          |
| Fe <sub>3</sub> O <sub>4</sub> | Fe-O  | 6.0             | 2.00±0.01         | 0.0135                              | -0.9                                 | 0.0092   |
|                                | Fe-Fe | 8.0             | 3.00±0.02         | 0.0145                              |                                      |          |
|                                | Fe-Fe | 8.0             | 3.50±0.01         | 0.0092                              |                                      |          |
| Fe-N <sub>3</sub> /NC-1000     | Fe-N  | 2.9±0.6         | 1.97±0.01         | 0.0111                              | -7.9                                 | 0.0048   |
|                                | Fe-O  | 2.3±0.5         | 1.70±0.03         | 0.0111                              |                                      |          |
| Fe-N <sub>3</sub> /NC-1100     | Fe-N  | 2.7±0.4         | 1.98±0.01         | 0.0101                              | -6.6                                 | 0.0035   |
|                                | Fe-O  | 2.1±0.3         | 1.72±0.02         | 0.0101                              |                                      |          |

<sup>a</sup>CN, coordination number; <sup>b</sup>R, distance between absorber and backscatter atoms; <sup>c</sup> $\sigma^2$ , Debye-Waller factor to account for both thermal and structural disorders; <sup>d</sup> $\Delta E_0$ , inner potential correction; R factor indicates the goodness of the fit.  $S_0^2$  was fixed to 0.811, according to the experimental EXAFS fit of Fe foil by fixing CN as the known crystallographic value. Fitting range:  $3.0 \leq k (\text{Å}^{-1}) \leq 12.5$  and  $1.0 \leq R (\text{Å}) \leq 3.0$  (Fe foil, FeO and Fe<sub>3</sub>O<sub>4</sub>);  $2.0 \leq k (\text{Å}^{-1}) \leq \sim 9.5$  and  $1.0 \leq R (\text{Å}) \leq \sim 3.0$  (Fe-1000 and Fe-1100). A reasonable range of EXAFS fitting parameters:  $0.700 < S_0^2 < 1.000$ ;  $CN > 0$ ;  $\sigma^2 > 0 \text{ Å}^2$ ;  $\Delta E_0 < 10 \text{ eV}$ ; R factor  $< 0.02$ .

**Table S4. Oxidative transformation of *R,R*-hydrobenzoin in different solvents.<sup>a</sup>**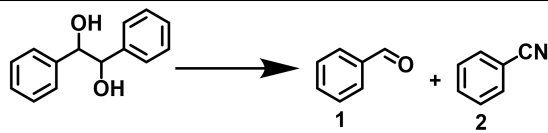

| Entry | Solvent      | Con. (%) | Sel. of 1 (%) | Sel. of 2 (%) |
|-------|--------------|----------|---------------|---------------|
| 1     | Toluene      | > 99     | 40            | 60            |
| 2     | Methanol     | > 99     | 14            | 58            |
| 3     | THF          | > 99     | 43            | 46            |
| 4     | Hexane       | > 99     | 10            | 31            |
| 5     | 1,4-Dioxane  | 43       | 93            | 7             |
| 6     | Acetonitrile | > 99     | 45            | 26            |

<sup>a</sup> Reaction conditions: *R,R*-hydrobenzoin (0.20 mmol), Fe-N<sub>3</sub>/NC-1100 (20 mg, 0.93 mmol%), NH<sub>3</sub>•H<sub>2</sub>O (26.5 wt.%, 200 μL), solvent (1.5 mL), O<sub>2</sub> (1 bar), 25 °C and 8 h.

**Table S5. The effect of NH<sub>3</sub>•H<sub>2</sub>O loading on the oxidative transformation of *R,R*-hydrobenzoin.<sup>a</sup>**

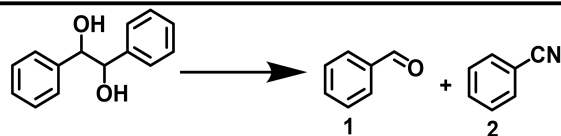

| Entry | NH <sub>3</sub> •H <sub>2</sub> O (μL) | Con. (%) | Sel. of 1 (%) | Sel. of 2 (%) |
|-------|----------------------------------------|----------|---------------|---------------|
| 1     | 50                                     | > 99     | 55            | 45            |
| 2     | 100                                    | > 99     | 50            | 50            |
| 3     | 200                                    | > 99     | 40            | 60            |
| 4     | 300                                    | > 99     | 29            | 71            |
| 5     | 400                                    | > 99     | 21            | 79            |

<sup>a</sup> Reaction conditions: *R,R*-hydrobenzoin (0.20 mmol), Fe-N<sub>3</sub>/NC-1100 (20 mg, 0.93 mmol%), NH<sub>3</sub>•H<sub>2</sub>O (26.5 wt.%, 50~400 μL), toluene (1.5 mL), O<sub>2</sub> (1 bar), 25 °C and 8 h.

**Table S6. Time course of the products distribution during the oxidative transformation of *R,R*-hydrobenzoin. <sup>a</sup>**

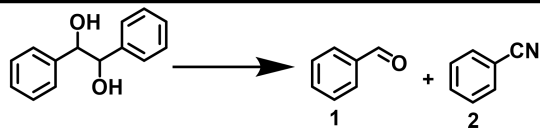

| Entry | Time (h) | Con. (%) | Sel. of 1 (%) | Sel. of 2 (%) |
|-------|----------|----------|---------------|---------------|
| 1     | 0.5      | 62       | 96            | 4             |
| 2     | 1        | 87       | 81            | 19            |
| 3     | 2        | > 99     | 67            | 33            |
| 4     | 4        | > 99     | 37            | 63            |
| 5     | 8        | > 99     | 29            | 71            |
| 6     | 16       | > 99     | 5             | 95            |
| 7     | 24       | > 99     | 0             | > 99          |

<sup>a</sup> Reaction conditions: *R,R*-hydrobenzoin (0.20 mmol), Fe-N<sub>3</sub>/NC-1100 (20 mg, 0.93 mmol%), NH<sub>3</sub>•H<sub>2</sub>O (26.5 wt.%, 400 μL), toluene (1.5 mL), O<sub>2</sub> (1 bar) and 25 °C.

**Table S7. The effect of the reaction temperature and oxygen pressure on the oxidative transformation of acetophenone. <sup>a</sup>**

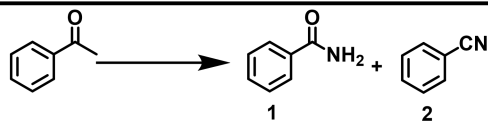

| Entry | T (°C) | O <sub>2</sub> pressure (bar) | Con. (%) | Sel. of 1 (%) | Sel. of 2 (%) |
|-------|--------|-------------------------------|----------|---------------|---------------|
| 1     | 120    | 1                             | 0        | -             | -             |
| 2     | 140    | 1                             | 0        | -             | -             |
| 3     | 150    | 1                             | 4        | 0             | 100           |
| 4     | 150    | 2.5                           | 15       | 27            | 73            |
| 5     | 150    | 5                             | 36       | 14            | 86            |
| 6     | 150    | 7.5                           | 70       | 19            | 81            |
| 7     | 150    | 10                            | 70       | 9             | 91            |

<sup>a</sup> Reaction conditions: Acetophenone (0.20 mmol), toluene (1.5 mL), Fe-N<sub>3</sub>/NC-1100 (20 mg, 0.93 mmol%), NH<sub>3</sub>•H<sub>2</sub>O (26.5 wt.%, 400 μL) and 4 h.

**Table S8. Time course of the products distribution during the oxidative transformation of acetophenone. <sup>a</sup>**

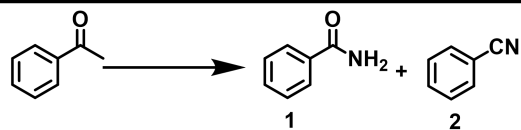

| Entry | Time (h) | Con. (%) | Yield of 1 (%) | Yield of 2 (%) |
|-------|----------|----------|----------------|----------------|
| 1     | 0.5      | 21       | 1              | 20             |
| 2     | 1        | 31       | 2              | 29             |
| 3     | 2        | 50       | 3              | 47             |
| 4     | 4        | 70       | 5              | 65             |
| 5     | 8        | 90       | 6              | 84             |
| 6     | 10       | 100      | 7              | 93             |

<sup>a</sup> Reaction conditions: Acetophenone (0.20 mmol), toluene (1.5 mL), Fe-N<sub>3</sub>/NC-1100 (20 mg, 0.93 mmol%), NH<sub>3</sub>•H<sub>2</sub>O (26.5 wt.%, 400 μL), 150 °C and O<sub>2</sub> (10 bar).

**Table S9. Control experiments for the oxidative transformation of ketones into nitriles. <sup>a</sup>**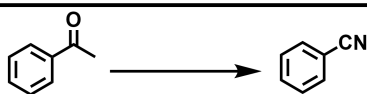

| Entry | Catalyst                                                       | T (°C) | Time (h) | Con. (%) | Yield (%) |
|-------|----------------------------------------------------------------|--------|----------|----------|-----------|
| 1     | Fe-N <sub>3</sub> /NC-1100                                     | 150    | 4        | 70       | 65        |
| 2     | NC-1100                                                        | 150    | 4        | 0        | -         |
| 3     | Fe-N <sub>3</sub> /NC-1100-H <sup>+</sup>                      | 150    | 4        | 76       | 74        |
| 4     | Fe-N <sub>3</sub> /NC-1100-H <sup>+</sup> + KSCN<br>(2 equiv.) | 150    | 4        | 13       | 12        |

<sup>a</sup> Reaction conditions: Acetophenone (0.20 mmol), toluene (1.5 mL), catalyst (20 mg, 0.93 mmol%), NH<sub>3</sub>•H<sub>2</sub>O (26.5 wt.%, 400 μL), 150 °C and O<sub>2</sub> (10 bar) and 4 h.



**Table S10. Control experiments for the oxidative transformation of secondary alcohols into nitriles. <sup>a</sup>**

---

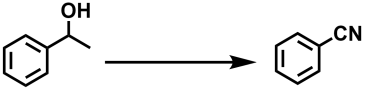

---

| Entry | Catalyst                                                       | T (°C) | Time (h) | Con. (%) | Yield (%) |
|-------|----------------------------------------------------------------|--------|----------|----------|-----------|
| 1     | Fe-N <sub>3</sub> /NC-1100                                     | 150    | 30       | 99       | 90        |
| 2     | NC-1100                                                        | 150    | 30       | 0        | -         |
| 3     | Fe-N <sub>3</sub> /NC-1100-H <sup>+</sup>                      | 150    | 30       | 99       | 94        |
| 4     | Fe-N <sub>3</sub> /NC-1100-H <sup>+</sup> + KSCN<br>(2 equiv.) | 150    | 30       | 28       | 27        |

---

<sup>a</sup> Reaction conditions: DL-1-phenethylalcohol (0.20 mmol), toluene (1.5 mL), catalyst (20 mg, 0.93 mmol%), NH<sub>3</sub>·H<sub>2</sub>O (26.5 wt.%, 400 μL), 150 °C and O<sub>2</sub> (10 bar) and 30 h.

**Table S11. The radical inhibition experiments of the oxidative transformation of acetophenone into benzonitrile. <sup>a</sup>**

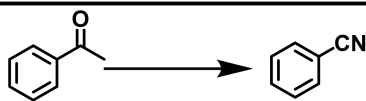

| Entry | Additive          | Conversion (%) | Yield (%) |
|-------|-------------------|----------------|-----------|
| 1     | -                 | 70             | 58        |
| 2     | BHT               | 18             | 18        |
| 3     | 1,4-Benzoquinone  | 16             | 13        |
| 4     | Furfuryl alcohol  | 65             | 54        |
| 5     | Isopropyl alcohol | 72             | 62        |

<sup>a</sup> Reaction conditions: Acetophenone (0.20 mmol), Fe-N<sub>3</sub>/NC-1100 catalyst (20 mg, 0.93 mmol%), additive (2 equiv.), NH<sub>3</sub>•H<sub>2</sub>O (26.5 wt.%, 400 μL), toluene (1.5 mL), O<sub>2</sub> (10 bar), 150 °C and 4 h.

**Table S12. Methods for the preparation of Fe-N<sub>3</sub>/NC-1100 with 1~5 gram scale.**

| Entry | Ferrocene | ZIF-8 | Pyrolysis (at ramp. 5 °C/min) | Catalyst mass (g) |
|-------|-----------|-------|-------------------------------|-------------------|
| 1     | 56 mg     | 4 g   | 1100 °C, 2 h                  | 1.46              |
| 2     | 112 mg    | 8 g   | 1100 °C, 2 h                  | 3.28              |
| 3     | 168 mg    | 12 g  | 1100 °C, 2 h                  | 5.12              |

**Table S13. Activity test of the prepared catalyst in difference scale. <sup>a</sup>**

| Substrates                    | 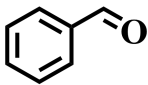 |  |  |  |
|-------------------------------|-----------------------------------------------------------------------------------|------------------------------------------------------------------------------------|-------------------------------------------------------------------------------------|-------------------------------------------------------------------------------------|
| Products                      |  |  |  |  |
| Catalyst from 1.46 g of scale | 97% yield                                                                         | 92% yield                                                                          | 99% yield                                                                           | 85% yield <sup>b</sup>                                                              |
| Catalyst from 3.28 g of scale | 99% yield                                                                         | 89% yield                                                                          | 99% yield                                                                           | 88% yield <sup>b</sup>                                                              |
| Catalyst from 5.12 g of scale | 95% yield                                                                         | 90% yield                                                                          | 99% yield                                                                           | 86% yield <sup>b</sup>                                                              |

<sup>a</sup> Reaction conditions: Substrate (0.20 mmol), catalyst (20 mg), NH<sub>3</sub>•H<sub>2</sub>O (26.5 wt.%, 400 μL) toluene (1.5 mL), O<sub>2</sub> (1 bar), 25 °C and 24 h; <sup>b</sup>O<sub>2</sub> (10 bar). 150 °C and 10 h.

**Table S14. Large-scale applications in the synthesis of nitriles. <sup>a</sup>**

|                   |                                                                                   |                                                                                   |                                                                                   |                                                                                    |                                                                                     |                                                                                     |
|-------------------|-----------------------------------------------------------------------------------|-----------------------------------------------------------------------------------|-----------------------------------------------------------------------------------|------------------------------------------------------------------------------------|-------------------------------------------------------------------------------------|-------------------------------------------------------------------------------------|
| <b>Substrates</b> | 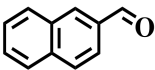 |  |  |  |  |  |
| <b>Products</b>   |  |  |  |  |  |  |
| <b>Yield</b>      | 86%                                                                               | 93%                                                                               | 83%                                                                               | 88%                                                                                | 93%                                                                                 | 95%                                                                                 |

<sup>a</sup> Reaction conditions: Substrates (2 g), catalyst (500 mg), NH<sub>3</sub>•H<sub>2</sub>O (26.5 wt.%, 1 mL) acetonitrile (10 mL), O<sub>2</sub> (10 bar), 80 °C and 24 h.

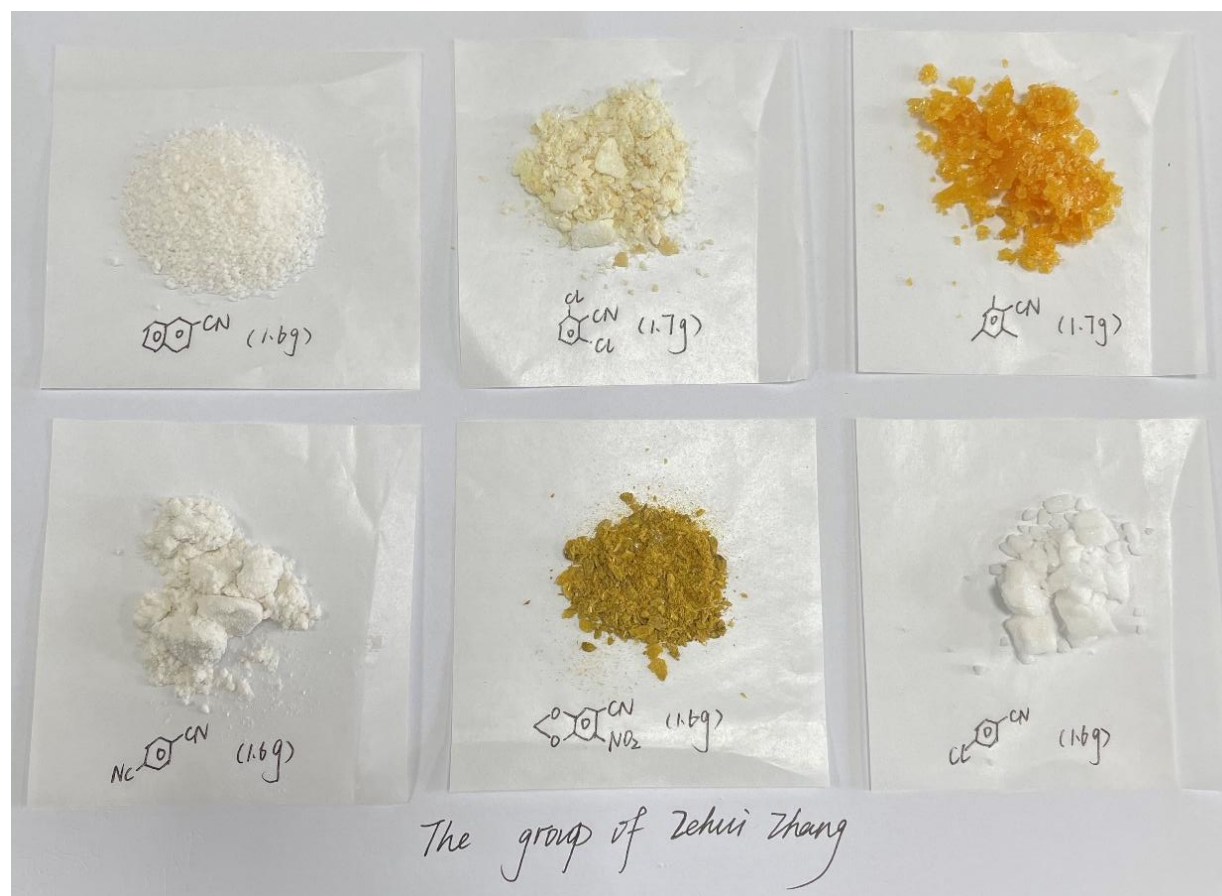

**The figure of products**

**Table S15. Large-scale cycle experiment in the synthesis of nitriles. <sup>a</sup>**

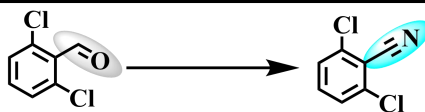

| Entry | Catalyst                   | T (°C) | Time (h) | Yield. (%) |
|-------|----------------------------|--------|----------|------------|
| 1     |                            | 80     | 24       | 99         |
| 2     |                            | 80     | 24       | 99         |
| 3     | Fe-N <sub>3</sub> /NC-1100 | 80     | 24       | 99         |
| 4     |                            | 80     | 24       | 99         |
| 5     |                            | 80     | 24       | 99         |

<sup>a</sup> Reaction conditions: 2,6-dichlorobenzaldehyde (1 g), Fe-N<sub>3</sub>/NC-1100 (500 mg), NH<sub>3</sub>•H<sub>2</sub>O (26.5 wt.%, 1 mL), acetonitrile (10 mL), O<sub>2</sub> (10 bar), 80 °C and 24 h.

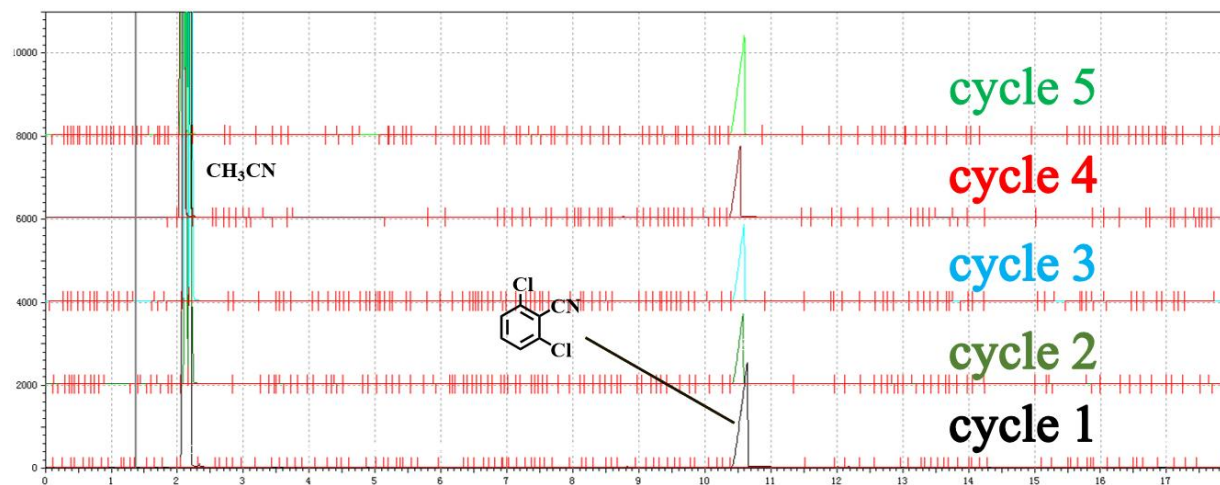

**GC spectrum of cycle**

### Benzonitrile

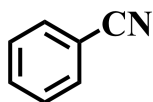

$^1\text{H NMR}$  (400 MHz,  $\text{CDCl}_3$ )  $\delta$  7.63-7.51 (m, 3H), 7.43 (t,  $J=7.7$  Hz, 2H).

$^{13}\text{C NMR}$  (101 MHz,  $\text{CDCl}_3$ )  $\delta$  132.71, 131.97, 129.03, 118.73, 112.19.

### 4-Fluorobenzonitrile

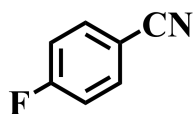

$^1\text{H NMR}$  (400 MHz,  $\text{CDCl}_3$ )  $\delta$  7.70-7.57 (m, 2H), 7.19-7.06 (m, 2H).

$^{13}\text{C NMR}$  (101 MHz,  $\text{CDCl}_3$ )  $\delta$  166.20, 163.65, 134.68, 134.59, 117.97, 116.88, 116.66, 108.46, 108.42.

### 4-Chlorobenzonitrile

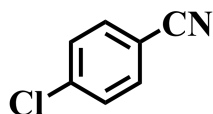

$^1\text{H NMR}$  (400 MHz,  $\text{CDCl}_3$ )  $\delta$  7.56 (d,  $J=8.5$  Hz, 2H), 7.42 (d,  $J=8.4$  Hz, 2H).

$^{13}\text{C NMR}$  (101 MHz,  $\text{CDCl}_3$ )  $\delta$  139.39, 133.32, 129.59, 117.89, 110.66.

### 4-Bromobenzonitrile

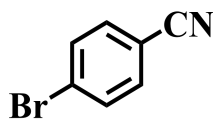

$^1\text{H NMR}$  (400 MHz,  $\text{CDCl}_3$ )  $\delta$  7.61-7.55 (m, 2H), 7.52-7.46 (m, 2H).

$^{13}\text{C NMR}$  (101 MHz,  $\text{CDCl}_3$ )  $\delta$  133.36, 132.54, 127.91, 117.99, 111.11.

## 2-Chlorobenzonitrile

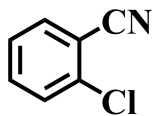

$^1\text{H NMR}$  (400 MHz,  $\text{CDCl}_3$ )  $\delta$  7.63 (dd,  $J=7.7, 1.5$  Hz, 1H), 7.57-7.43 (m, 2H), 7.40-7.32 (m, 1H).

$^{13}\text{C NMR}$  (101 MHz,  $\text{CDCl}_3$ )  $\delta$  136.64, 133.95, 129.98, 127.21, 115.93, 113.17.

## 4-Methylbenzonitrile

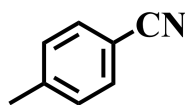

$^1\text{H NMR}$  (400 MHz,  $\text{CDCl}_3$ )  $\delta$  7.46 (d,  $J=8.0$  Hz, 2H), 7.22 (d,  $J=8.0$  Hz, 2H), 2.36 (s, 3H).

$^{13}\text{C NMR}$  (101 MHz,  $\text{CDCl}_3$ )  $\delta$  143.60, 131.82, 129.71, 119.00, 109.05, 21.64.

## 4-Methoxybenzonitrile

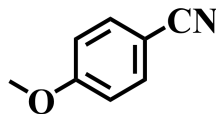

$^1\text{H NMR}$  (400 MHz,  $\text{CDCl}_3$ )  $\delta$  7.51 (d,  $J=8.9$  Hz, 2H), 6.89 (d,  $J=8.9$  Hz, 2H), 3.80 (s, 3H).

$^{13}\text{C NMR}$  (101 MHz,  $\text{CDCl}_3$ )  $\delta$  162.74, 133.81, 119.13, 114.66, 103.67, 55.44.

## 3-Methoxybenzonitrile

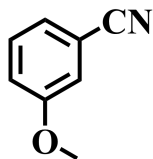

$^1\text{H NMR}$  (400 MHz,  $\text{CD}_3\text{OD}$ )  $\delta$  7.46-7.33 (m, 1H), 7.27-7.10 (m, 3H), 3.84-3.72 (m, 3H).

$^{13}\text{C NMR}$  (101 MHz,  $\text{CD}_3\text{OD}$ )  $\delta$  161.17, 131.59, 125.32, 120.40, 119.60, 117.85, 114.03, 56.07.



### Isonicotinonitrile

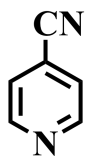

$^1\text{H NMR}$  (400 MHz,  $\text{CDCl}_3$ )  $\delta$  8.76-8.65 (m, 2H), 7.46 (dd,  $J=4.5, 1.5$  Hz, 2H).

$^{13}\text{C NMR}$  (101 MHz,  $\text{CDCl}_3$ )  $\delta$  150.60, 125.12, 120.18, 116.26.

### Furan-2-carbonitrile

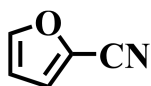

$^1\text{H NMR}$  (400 MHz,  $\text{CD}_3\text{OD}$ )  $\delta$  7.85-7.70 (m, 1H), 7.28 (d,  $J=3.6$  Hz, 1H), 6.63 (dd,  $J=3.6, 1.8$  Hz, 1H).

$^{13}\text{C NMR}$  (101 MHz,  $\text{CD}_3\text{OD}$ )  $\delta$  149.43, 127.11, 123.48, 112.65, 112.32.

### 3-Chlorobenzonitrile

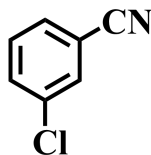

$^1\text{H NMR}$  (400 MHz,  $\text{CDCl}_3$ )  $\delta$  7.62-7.50 (m, 3H), 7.45-7.37 (m, 1H).

$^{13}\text{C NMR}$  (101 MHz,  $\text{CDCl}_3$ )  $\delta$  135.15, 133.22, 131.84, 130.52, 130.29, 117.41, 113.89.

### 4-(Trifluoromethyl)benzonitrile

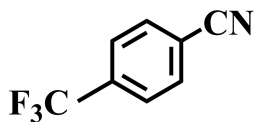

$^1\text{H NMR}$  (400 MHz,  $\text{CDCl}_3$ )  $\delta$  7.79 (d,  $J=8.3$  Hz, 2H), 7.73 (d,  $J=8.4$  Hz, 2H).

$^{13}\text{C NMR}$  (101 MHz,  $\text{CDCl}_3$ )  $\delta$  132.73, 126.23, 126.20, 126.16, 126.12, 124.46, 121.75, 117.48, 116.07.

### 1,4-Dicyanobenzene

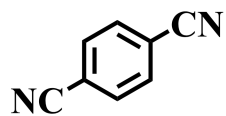

$^1\text{H NMR}$  (400 MHz,  $\text{CDCl}_3$ )  $\delta$  7.80 (s, 4H).

$^{13}\text{C NMR}$  (101 MHz,  $\text{CDCl}_3$ )  $\delta$  132.85, 117.07, 116.75.

### 4-Nitrobenzonitrile

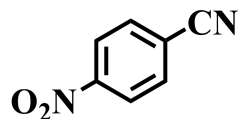

$^1\text{H NMR}$  (400 MHz,  $\text{CDCl}_3$ )  $\delta$  8.35 (d,  $J=8.7$  Hz, 2H), 7.89 (d,  $J=8.8$  Hz, 2H).

$^{13}\text{C NMR}$  (101 MHz,  $\text{CDCl}_3$ )  $\delta$  150.04, 133.57, 124.33, 118.32, 116.90.

### 4-(Methylsulfonyl)benzonitrile

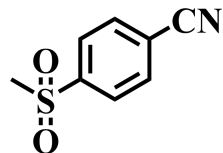

$^1\text{H NMR}$  (400 MHz,  $\text{CDCl}_3$ )  $\delta$  8.06 (d,  $J=8.5$  Hz, 2H), 7.87 (d,  $J=8.5$  Hz, 2H), 3.08 (s, 3H).

$^{13}\text{C NMR}$  (101 MHz,  $\text{CDCl}_3$ )  $\delta$  144.42, 133.26, 128.22, 117.53, 117.14, 44.21.

### 3-Methylbenzonitrile

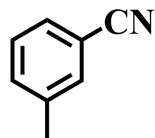

$^1\text{H NMR}$  (400 MHz,  $\text{CD}_3\text{OD}$ )  $\delta$  7.61-7.10 (m, 4H), 2.34 (s, 3H).

$^{13}\text{C NMR}$  (101 MHz,  $\text{CD}_3\text{OD}$ )  $\delta$  140.74, 134.85, 133.34, 130.22, 130.21, 119.82, 113.05, 21.06.

### 2-Methylbenzonitrile

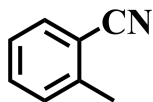

$^1\text{H NMR}$  (400 MHz,  $\text{CD}_3\text{OD}$ )  $\delta$  7.64-7.43 (m, 2H), 7.38-7.21 (m, 2H), 2.45 (s, 3H).

$^{13}\text{C NMR}$  (101 MHz,  $\text{CD}_3\text{OD}$ )  $\delta$  142.89, 133.94, 133.42, 131.31, 127.44, 118.83, 113.46, 20.39.

### 4-Tert-Butylbenzonitrile

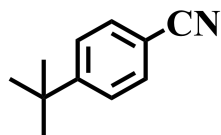

$^1\text{H NMR}$  (400 MHz,  $\text{CD}_3\text{OD}$ )  $\delta$  7.58 (dd,  $J=19.5, 8.5$  Hz, 4H), 1.31 (s, 9H).

$^{13}\text{C NMR}$  (101 MHz,  $\text{CD}_3\text{OD}$ )  $\delta$  157.84, 132.80, 127.26, 119.69, 110.02, 35.87, 31.07.

### 2-Methoxybenzonitrile

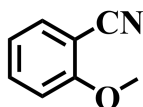

$^1\text{H NMR}$  (400 MHz,  $\text{CD}_3\text{OD}$ )  $\delta$  7.34-7.27 (m, 2H), 7.26-7.20 (m, 1H), 2.89-2.78 (m, 1H), 2.60 (qd,  $J=7.2, 1.7$  Hz, 3H).

$^{13}\text{C NMR}$  (101 MHz,  $\text{CD}_3\text{OD}$ )  $\delta$  162.52, 135.90, 134.65, 121.89, 117.32, 112.68, 102.14, 56.61.

### 4-Cyanothioanisole

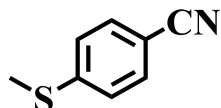

$^1\text{H NMR}$  (400 MHz,  $\text{CDCl}_3$ )  $\delta$  7.48 (d,  $J=8.4$  Hz, 2H), 7.23 (t,  $J=11.4$  Hz, 2H), 2.47 (d,  $J=6.4$  Hz, 3H).

$^{13}\text{C NMR}$  (101 MHz,  $\text{CDCl}_3$ )  $\delta$  146.03, 131.99, 125.30, 118.87, 107.37, 14.52.

### [1,1'-Biphenyl]-4-carbonitrile

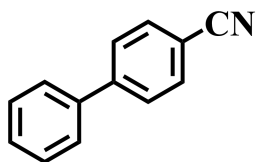

$^1\text{H NMR}$  (400 MHz,  $\text{CDCl}_3$ )  $\delta$  7.68 (q,  $J=8.5$  Hz, 4H), 7.63-7.54 (m, 2H), 7.54-7.40 (m, 3H).

$^{13}\text{C NMR}$  (101 MHz,  $\text{CDCl}_3$ )  $\delta$  145.49, 139.00, 132.51, 129.07, 128.63, 127.62, 127.14, 118.91, 110.77.

### Benzo[d][1,3]dioxole-5-carbonitrile

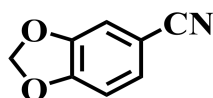

$^1\text{H NMR}$  (400 MHz,  $\text{CDCl}_3$ )  $\delta$  7.16 (dd,  $J=8.1, 1.5$  Hz, 1H), 6.98 (d,  $J=1.4$  Hz, 1H), 6.83 (d,  $J=8.1$  Hz, 1H), 6.04 (s, 2H).

$^{13}\text{C NMR}$  (101 MHz,  $\text{CDCl}_3$ )  $\delta$  151.50, 147.98, 128.15, 118.87, 111.28, 109.08, 104.78, 102.25.

### Naphthonitrile

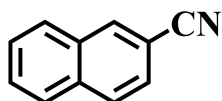

$^1\text{H NMR}$  (400 MHz,  $\text{CDCl}_3$ )  $\delta$  8.14 (s, 1H), 7.88-7.78 (m, 3H), 7.65-7.50 (m, 3H).

$^{13}\text{C NMR}$  (101 MHz,  $\text{CDCl}_3$ )  $\delta$  134.50, 134.01, 132.09, 129.09, 128.98, 128.31, 127.96, 127.59, 126.18, 119.21, 109.20.

### Thiophene-2-carbonitrile

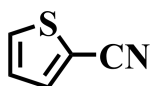

$^1\text{H NMR}$  (400 MHz,  $\text{CDCl}_3$ )  $\delta$  7.63-7.55 (m, 2H), 7.14-7.04 (m, 1H).

$^{13}\text{C NMR}$  (101 MHz,  $\text{CDCl}_3$ )  $\delta$  147.38, 137.41, 132.68, 127.64, 122.04, 114.21, 109.61.

### Phenylpropanenitrile

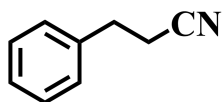

$^1\text{H NMR}$  (400 MHz,  $\text{CD}_3\text{OD}$ )  $\delta$  7.34-7.27 (m, 2H), 7.26-7.20 (m, 3H), 2.89-2.78 (m, 2H), 2.60 (qd,  $J=7.2, 1.7$  Hz, 2H).

$^{13}\text{C NMR}$  (101 MHz,  $\text{CD}_3\text{OD}$ )  $\delta$  139.86, 129.62, 129.36, 127.92, 120.66, 32.16, 19.49.

### 1,3-Dicyanobenzene

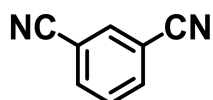

$^1\text{H NMR}$  (400 MHz,  $\text{CDCl}_3$ )  $\delta$  8.03-7.81 (m, 3H), 7.66 (t,  $J=7.8$  Hz, 1H).

$^{13}\text{C NMR}$  (101 MHz,  $\text{CDCl}_3$ )  $\delta$  136.02, 135.39, 130.34, 116.62, 114.02.

### 2,6-Dichlorobenzonitrile

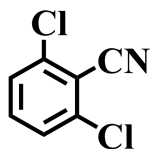

$^1\text{H NMR}$  (400 MHz,  $\text{CDCl}_3$ )  $\delta$  7.54-7.35 (m, 3H).

$^{13}\text{C NMR}$  (101 MHz,  $\text{CDCl}_3$ )  $\delta$  138.49, 133.97, 128.21, 114.38, 113.40.

### 3,5-Dibromobenzonitrile

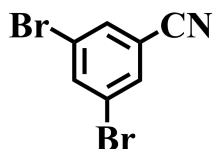

$^1\text{H NMR}$  (400 MHz,  $\text{CDCl}_3$ )  $\delta$  7.95-7.85 (m, 1H), 7.73 (d,  $J=1.3$  Hz, 2H).

$^{13}\text{C NMR}$  (101 MHz,  $\text{CDCl}_3$ )  $\delta$  138.85, 133.47, 123.61, 115.94, 115.45.

### 2,4,6-Trimethylbenzonitrile

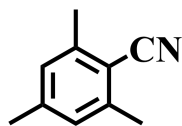

$^1\text{H NMR}$  (400 MHz,  $\text{CD}_3\text{OD}$ )  $\delta$  7.23-6.71 (m, 2H), 2.75-1.80 (m, 9H).

$^{13}\text{C NMR}$  (101 MHz,  $\text{CD}_3\text{OD}$ )  $\delta$  144.34, 142.80, 129.09, 118.05, 110.75, 21.39, 20.39.

### 4-Vinylbenzonitrile

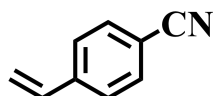

$^1\text{H NMR}$  (400 MHz,  $\text{CDCl}_3$ )  $\delta$  7.58 (d,  $J=8.2$  Hz, 2H), 7.47 (t,  $J=10.7$  Hz, 2H), 6.70 (dd,  $J=17.6, 10.9$  Hz, 1H), 5.86 (d,  $J=17.6$  Hz, 1H), 5.43 (d,  $J=10.9$  Hz, 1H).

$^{13}\text{C NMR}$  (101 MHz,  $\text{CDCl}_3$ )  $\delta$  141.82, 135.27, 132.31, 126.69, 118.87, 117.71, 110.99.

### 2,3-Dihydrothieno[3,4-b][1,4]dioxine-5-carbonitrile

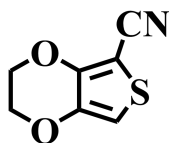

$^1\text{H NMR}$  (400 MHz,  $\text{CD}_3\text{OD}$ )  $\delta$  6.83 (s, 1H), 4.43-4.30 (m, 2H), 4.25 (dd,  $J=5.3, 3.0$  Hz, 2H).

$^{13}\text{C NMR}$  (101 MHz,  $\text{CD}_3\text{OD}$ )  $\delta$  151.14, 142.16, 113.41, 108.61, 85.23, 66.75, 65.37.

### Quinoline-6-carbonitrile

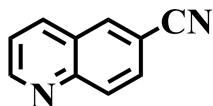

$^1\text{H NMR}$  (400 MHz,  $\text{CDCl}_3$ )  $\delta$  8.90 (s, 1H), 8.26-7.87 (m, 3H), 7.66 (d,  $J=6.6$  Hz, 1H), 7.39 (s, 1H).

$^{13}\text{C NMR}$  (101 MHz,  $\text{CDCl}_3$ )  $\delta$  152.91, 148.65, 136.04, 133.83, 130.62, 129.69, 127.16, 122.47, 118.19, 109.88.

#### 4-(Trifluoromethoxy)benzonitrile

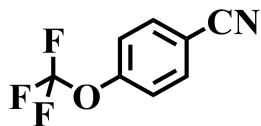

$^1\text{H NMR}$  (400 MHz,  $\text{CD}_3\text{OD}$ )  $\delta$  7.85 (d,  $J=8.6$  Hz, 2H), 7.45 (d,  $J=8.2$  Hz, 2H).

$^{13}\text{C NMR}$  (101 MHz,  $\text{CD}_3\text{OD}$ )  $\delta$  153.26, 135.50, 122.43, 118.41, 112.02.

#### 6-Nitrobenzo[d][1,3]dioxole-5-carbonitrile

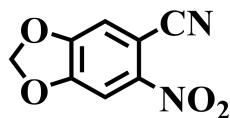

$^1\text{H NMR}$  (400 MHz,  $\text{CD}_3\text{OD}$ )  $\delta$  7.82 (s, 1H), 7.40 (d,  $J=8.4$  Hz, 1H), 6.31 (s, 2H).

$^{13}\text{C NMR}$  (101 MHz,  $\text{CD}_3\text{OD}$ )  $\delta$  113.78, 106.80, 106.30.

#### 2-Phenylacetonitrile

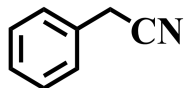

$^1\text{H NMR}$  (400 MHz,  $\text{CD}_3\text{OD}$ )  $\delta$  7.58-6.89 (m, 5H), 4.07-3.52 (m, 2H).

$^{13}\text{C NMR}$  (101 MHz,  $\text{CD}_3\text{OD}$ )  $\delta$  131.89, 129.92, 128.88, 128.69, 119.59, 23.44.

#### Cinnamonitrile

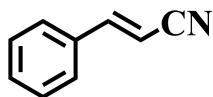

$^1\text{H NMR}$  (400 MHz,  $\text{CDCl}_3$ )  $\delta$  7.80-6.93 (m, 6H), 5.85 (d,  $J=16.6$  Hz, 1H).

$^{13}\text{C NMR}$  (101 MHz,  $\text{CDCl}_3$ )  $\delta$  150.36, 133.31, 131.06, 128.94, 127.23, 118.08, 96.13.

### Cyclohexanecarbonitrile

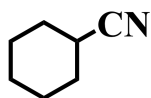

$^1\text{H NMR}$  (400 MHz,  $\text{CDCl}_3$ )  $\delta$  2.58 (dt,  $J=11.9, 4.0$  Hz, 1H), 1.98-1.54 (m, 6H), 1.53-1.17 (m, 4H).

$^{13}\text{C NMR}$  (101 MHz,  $\text{CDCl}_3$ )  $\delta$  122.50, 29.33, 27.79, 25.08, 23.90.

### Pentanenitrile

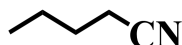

$^1\text{H NMR}$  (400 MHz,  $\text{CDCl}_3$ )  $\delta$  2.26 (t,  $J=7.1$  Hz, 2H), 1.55 (dt,  $J=15.1, 7.1$  Hz, 2H), 1.46-1.29 (m, 2H), 0.86 (t,  $J=7.3$  Hz, 3H).

$^{13}\text{C NMR}$  (101 MHz,  $\text{CDCl}_3$ )  $\delta$  119.61, 27.03, 21.51, 16.47, 12.90.

### Adiponitrile

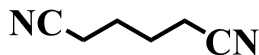

$^1\text{H NMR}$  (400 MHz,  $\text{CDCl}_3$ )  $\delta$  2.59-1.95 (m, 4H), 1.90-1.39 (m, 4H).

$^{13}\text{C NMR}$  (101 MHz,  $\text{CDCl}_3$ )  $\delta$  118.73, 23.59, 15.83.

### Heptanenitrile

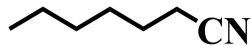

$^1\text{H NMR}$  (400 MHz,  $\text{CD}_3\text{OD}$ )  $\delta$  2.78-2.13 (m, 2H), 1.91-0.51 (m, 11H).

$^{13}\text{C NMR}$  (101 MHz,  $\text{CD}_3\text{OD}$ )  $\delta$  120.91, 31.87, 29.18, 26.23, 23.23, 17.11, 14.13.

### Octanenitrile

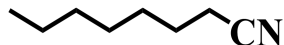

$^1\text{H NMR}$  (400 MHz,  $\text{CD}_3\text{OD}$ )  $\delta$  2.52-2.25 (m, 2H), 1.81-1.17 (m, 10H), 1.00-0.76 (m, 3H).

$^{13}\text{C NMR}$  (101 MHz,  $\text{CD}_3\text{OD}$ )  $\delta$  120.90, 32.50, 29.48, 29.37, 26.28, 23.39, 17.11, 14.23.



### Dodecanenitrile

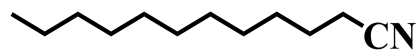

$^1\text{H NMR}$  (400 MHz,  $\text{CD}_3\text{OD}$ )  $\delta$  2.67-2.12 (m, 2H), 1.80-1.09 (m, 16H), 1.06-0.68 (m, 3H).

$^{13}\text{C NMR}$  (101 MHz,  $\text{CD}_3\text{OD}$ )  $\delta$  120.86, 32.88, 30.54, 30.50, 30.33, 30.29, 29.75, 29.56, 26.31, 23.56, 17.13, 14.34.

### 3,4,5-Trimethoxybenzonitrile

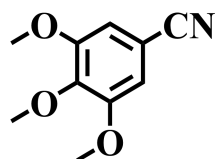

$^1\text{H NMR}$  (400 MHz,  $\text{CD}_3\text{OD}$ )  $\delta$  7.01 (s, 2H), 4.09-3.49 (m, 9H).

$^{13}\text{C NMR}$  (101 MHz,  $\text{CD}_3\text{OD}$ )  $\delta$  154.77, 110.53, 61.01, 56.73.

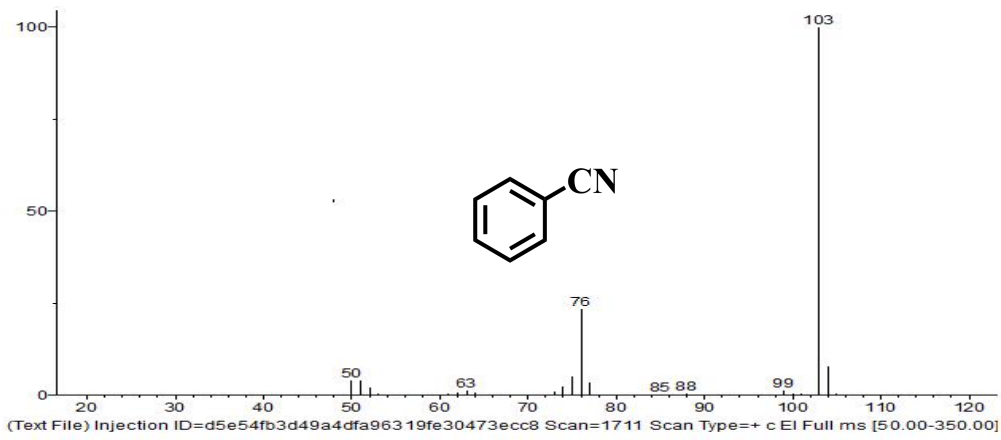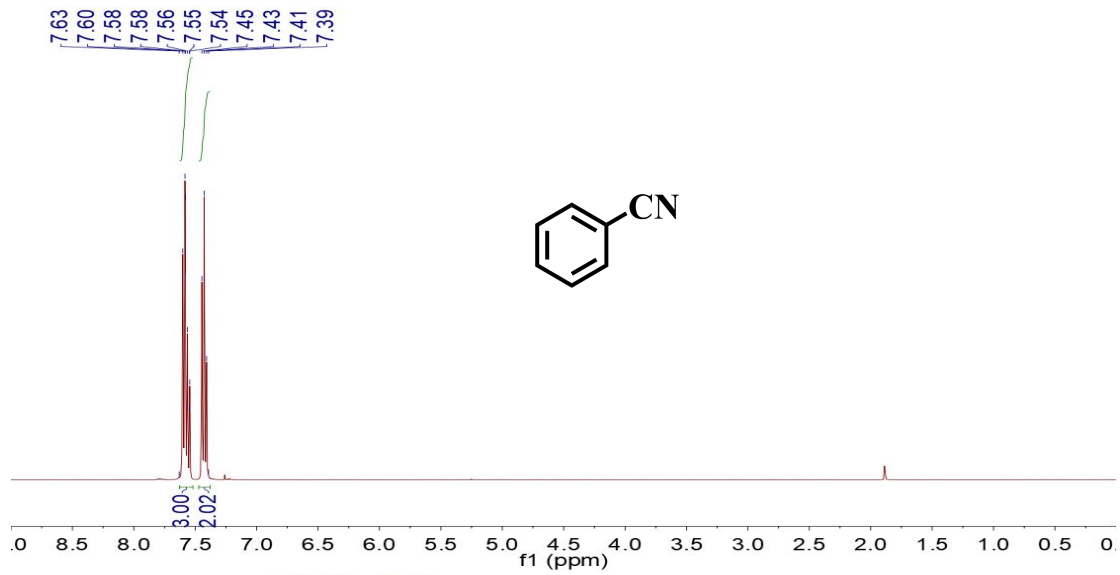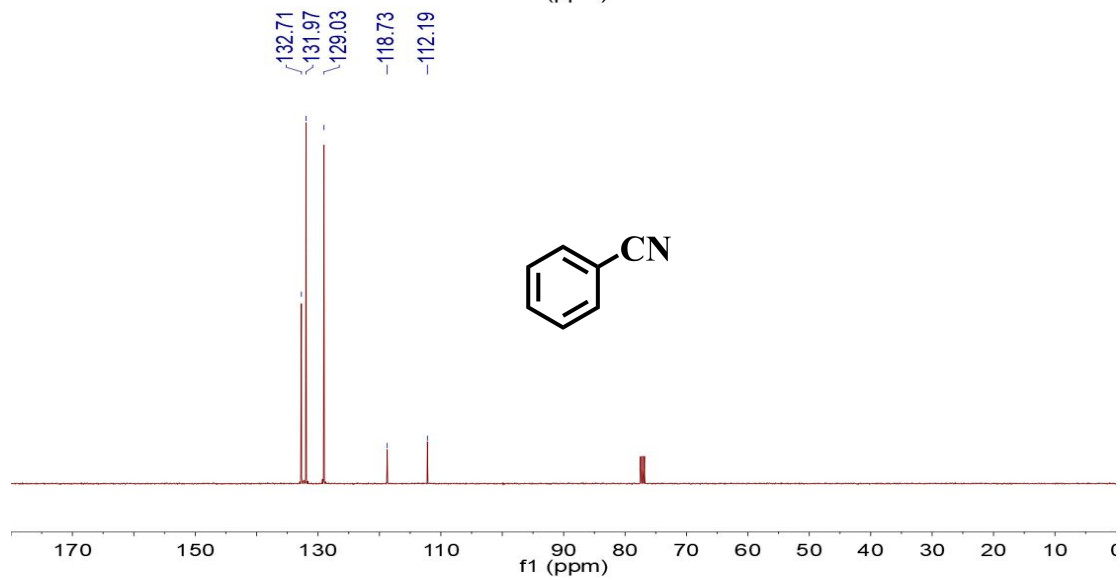

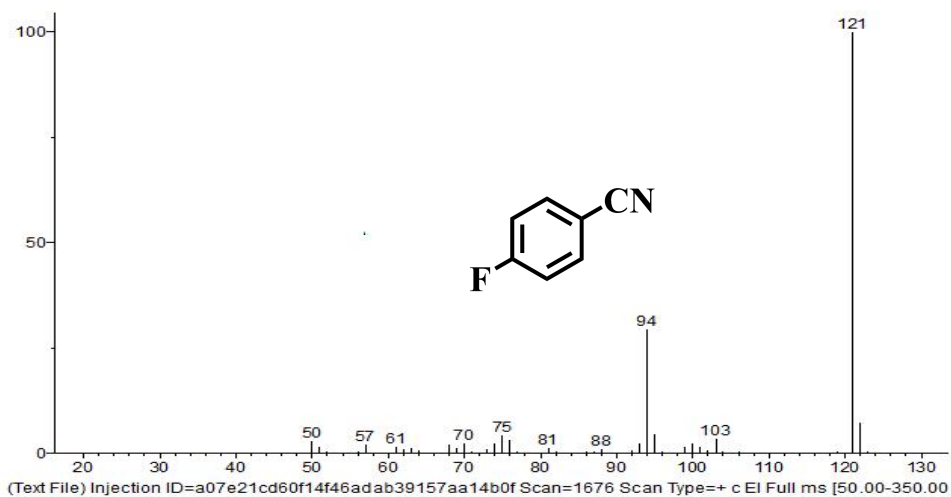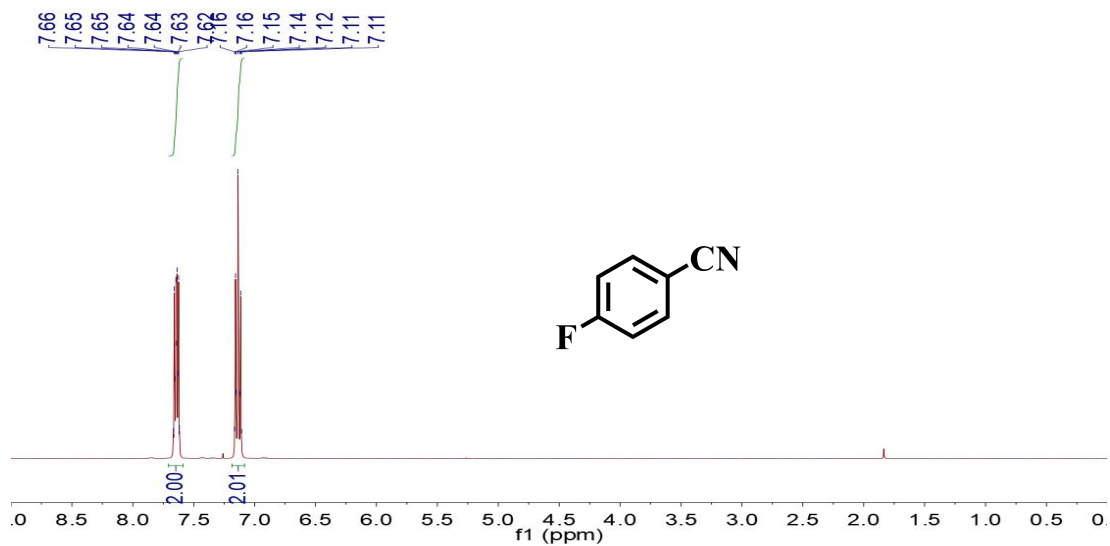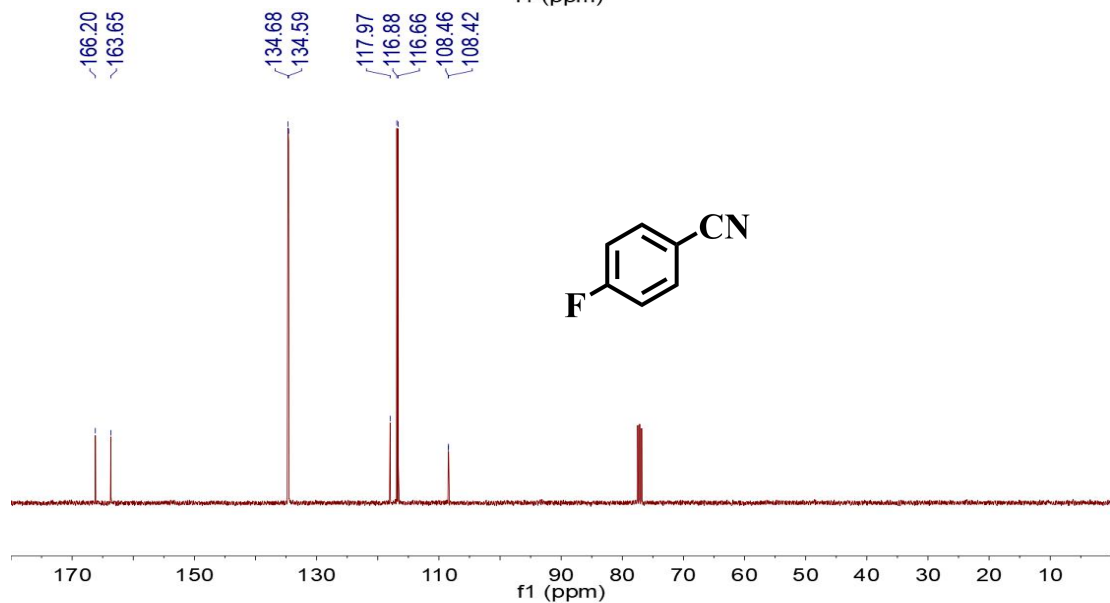

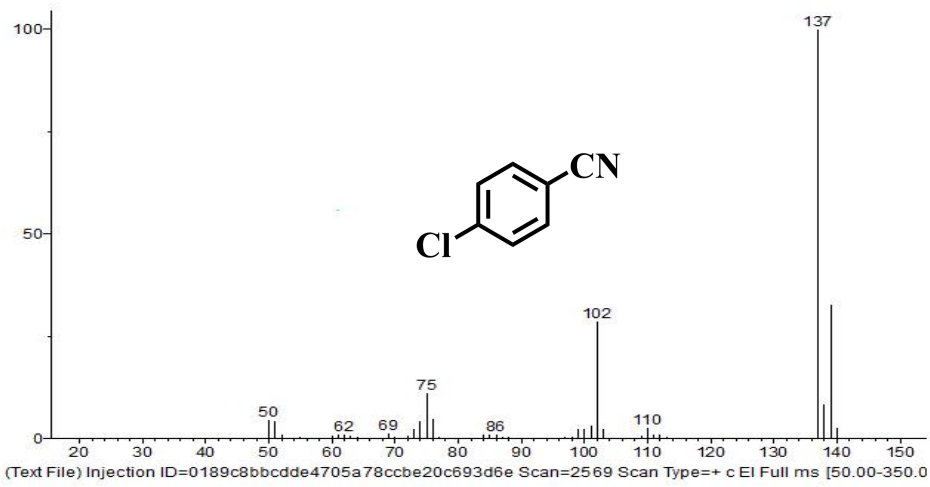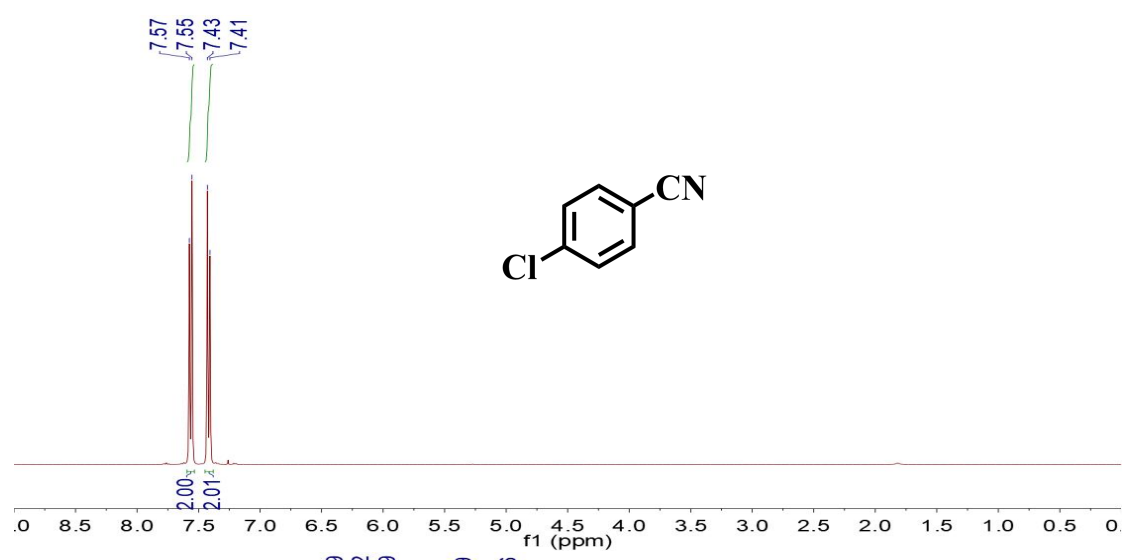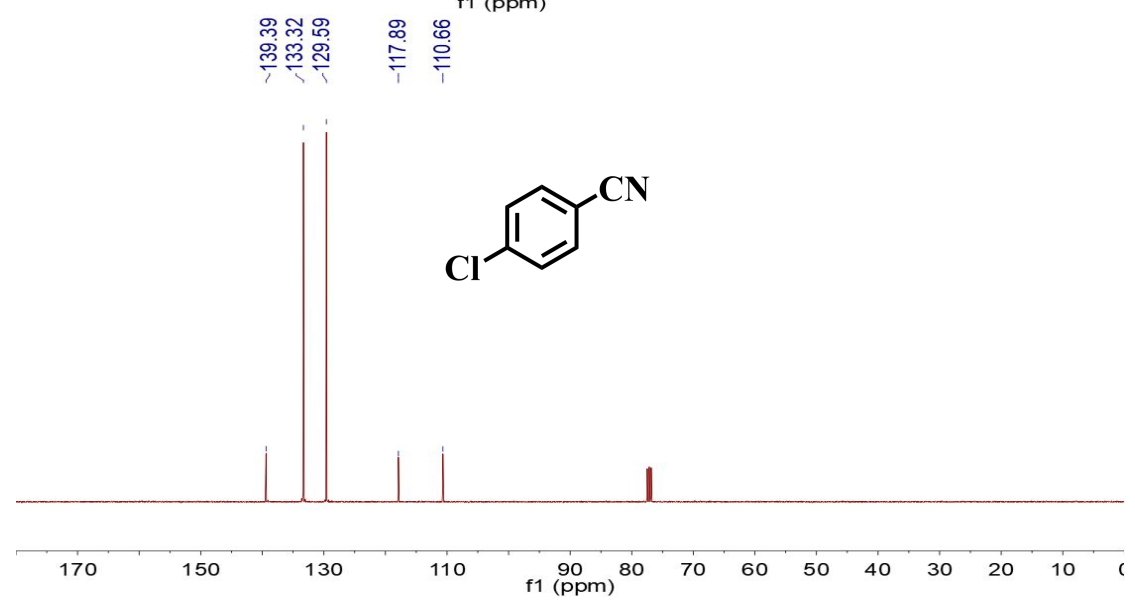

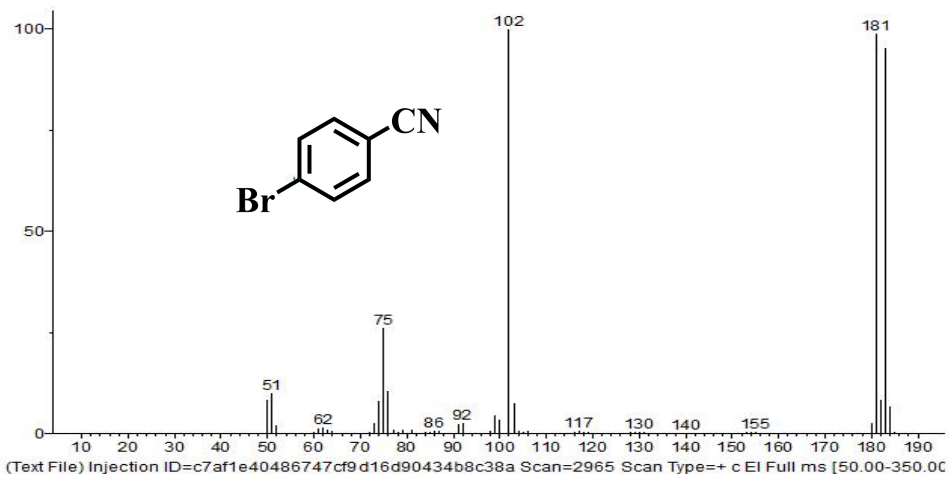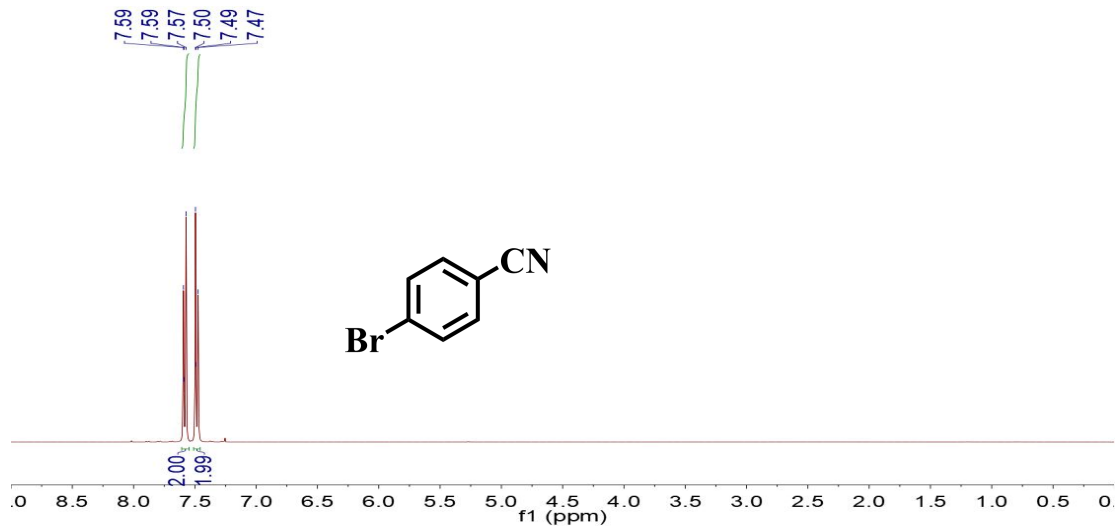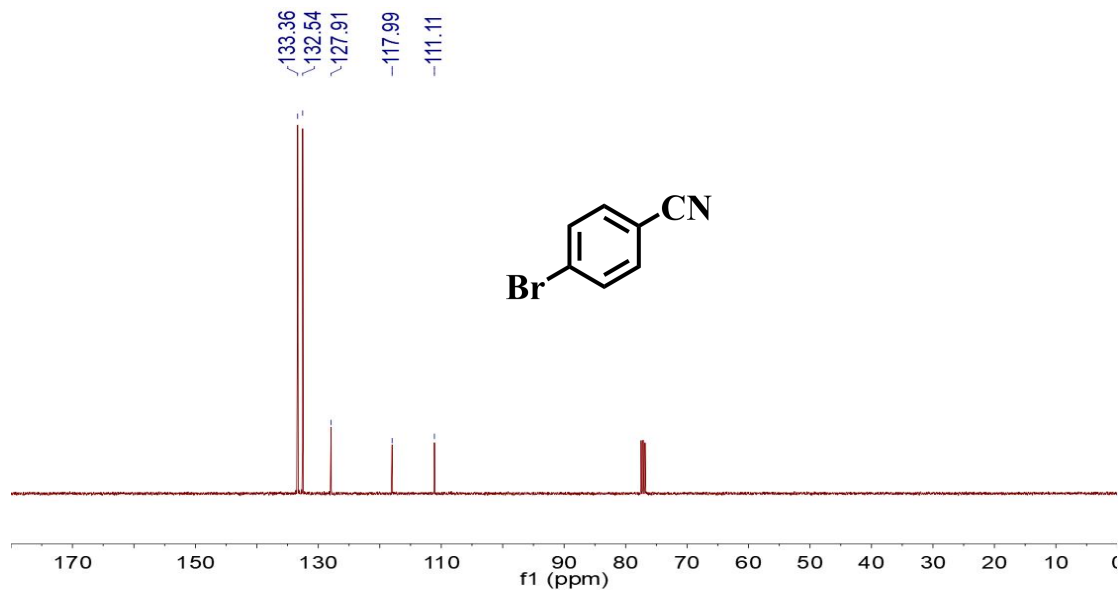

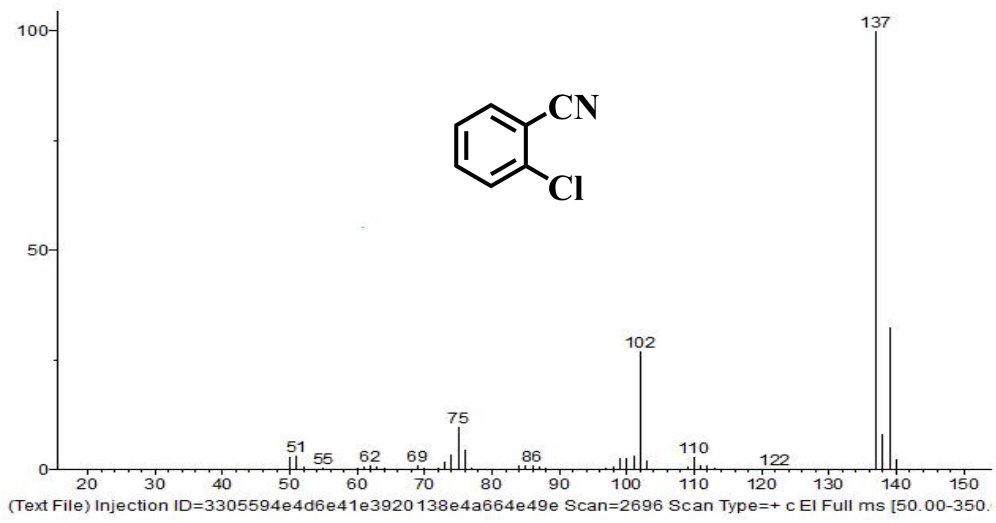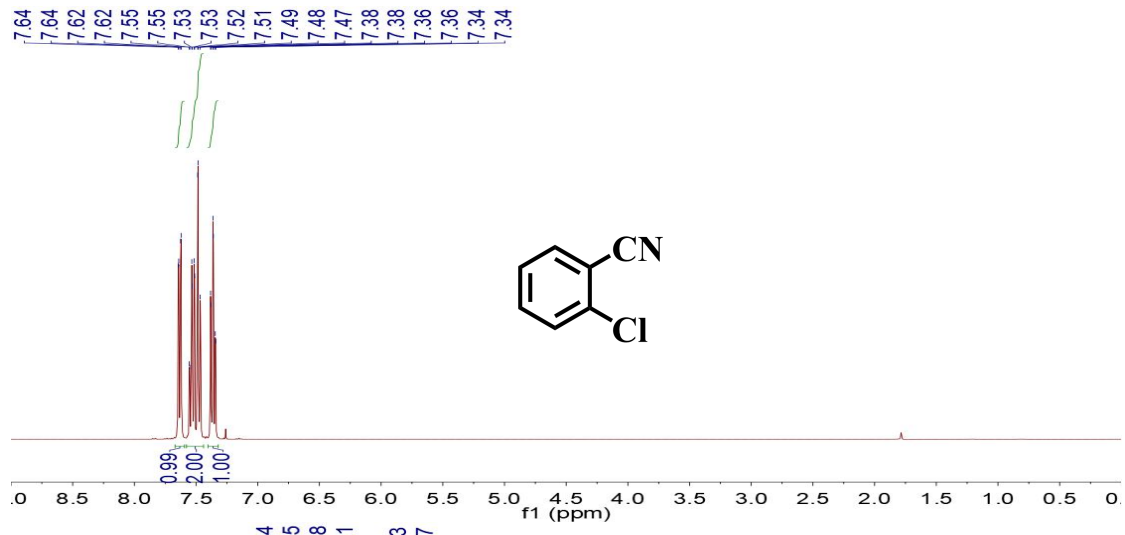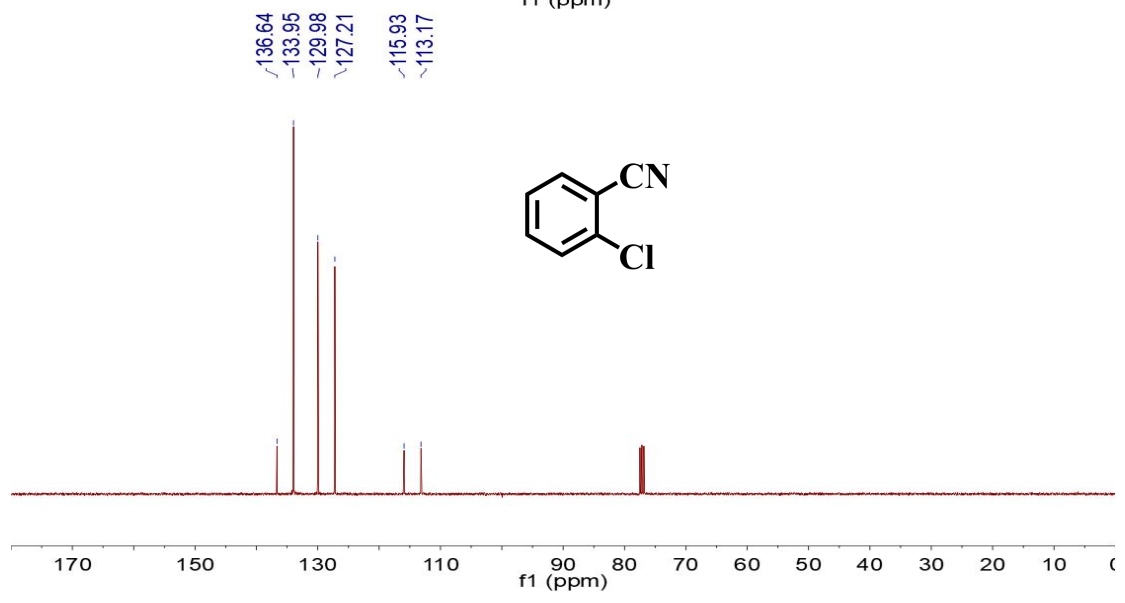

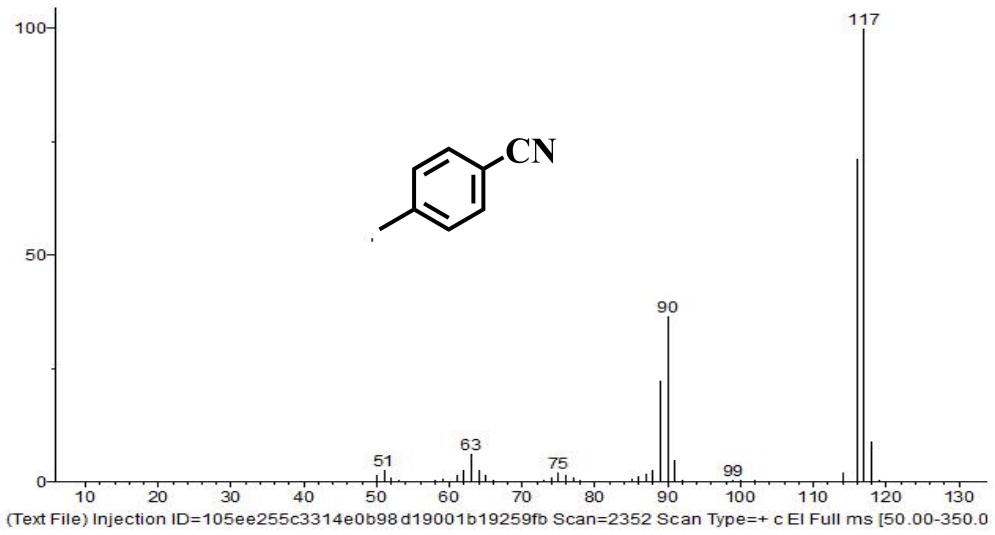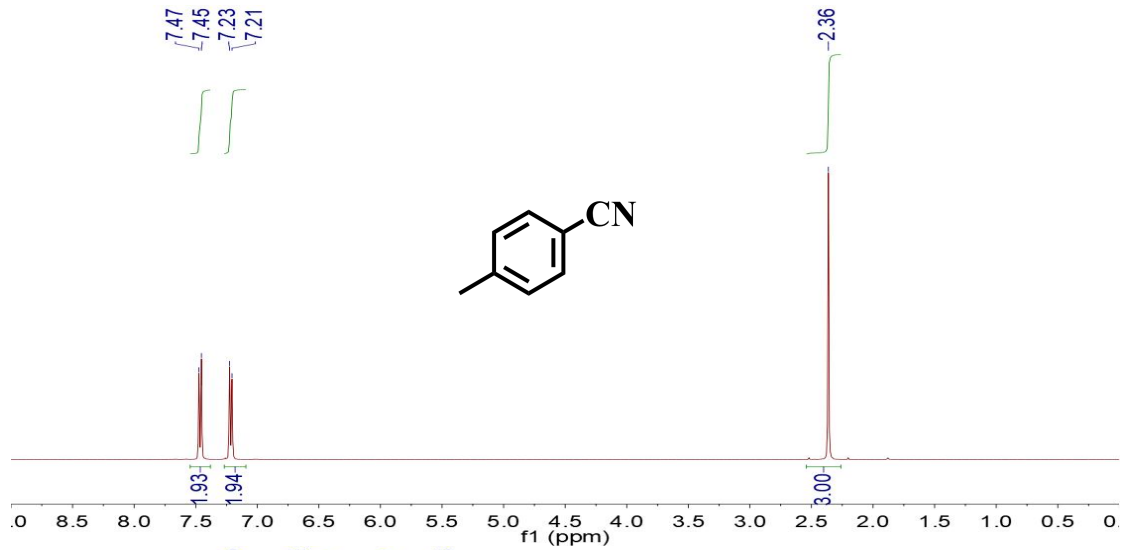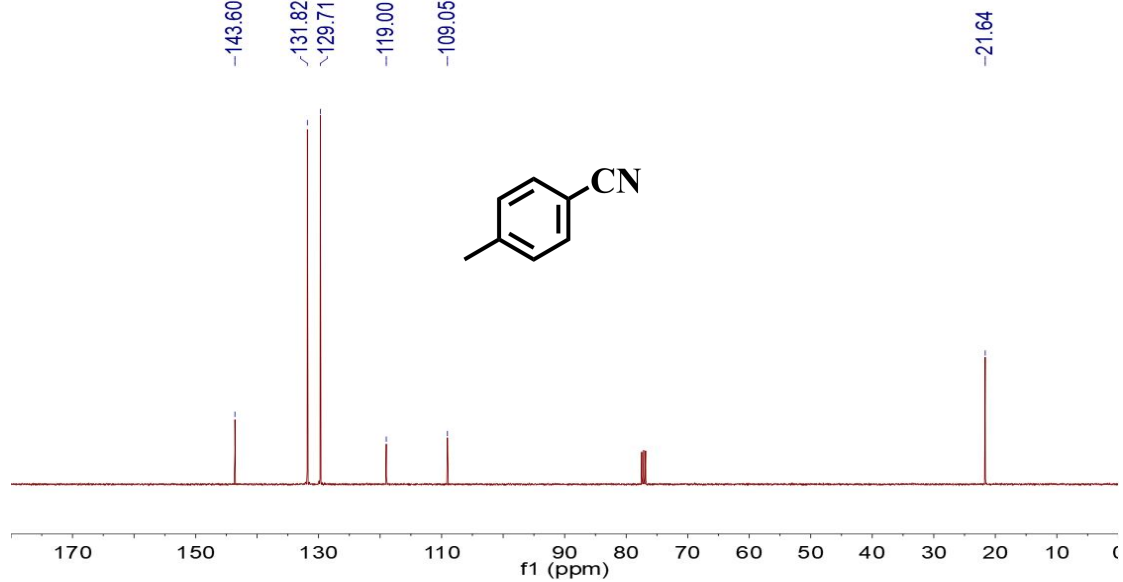

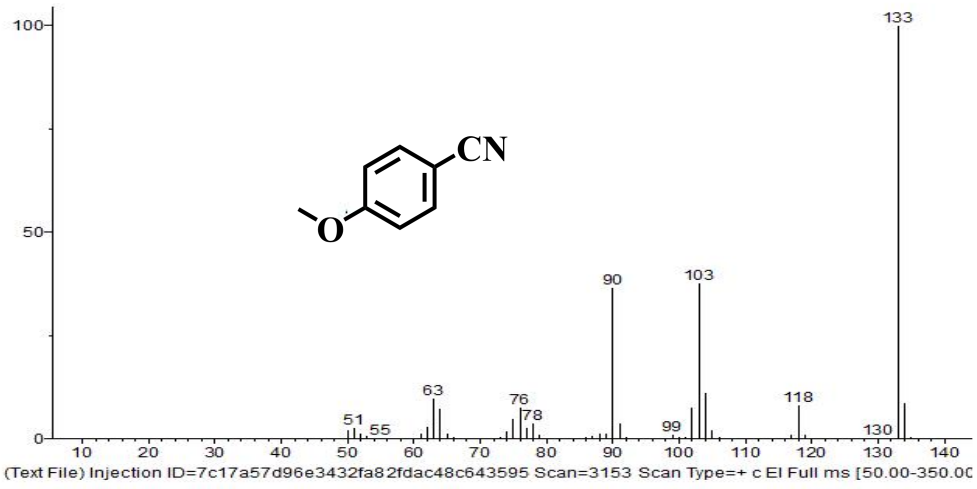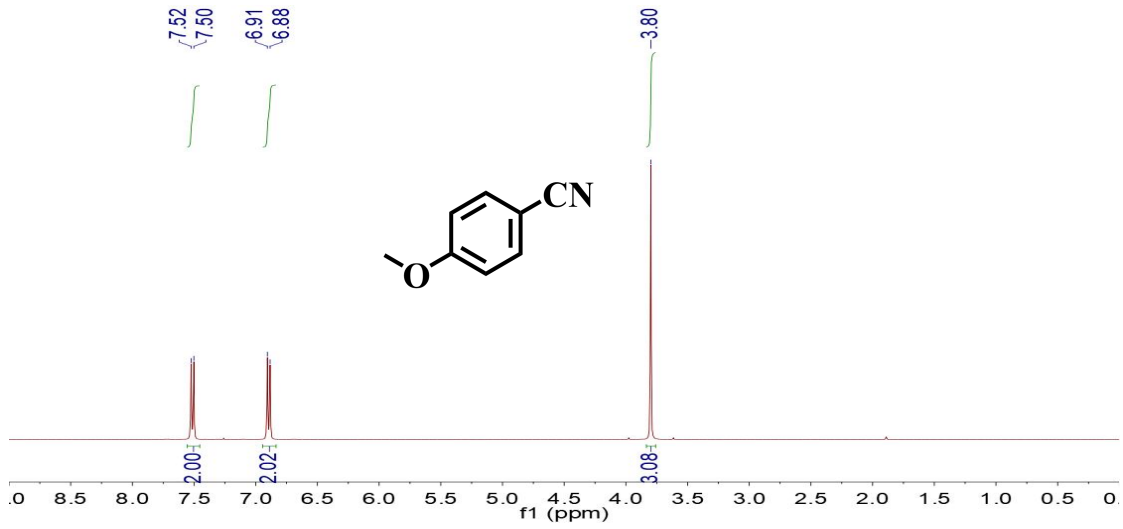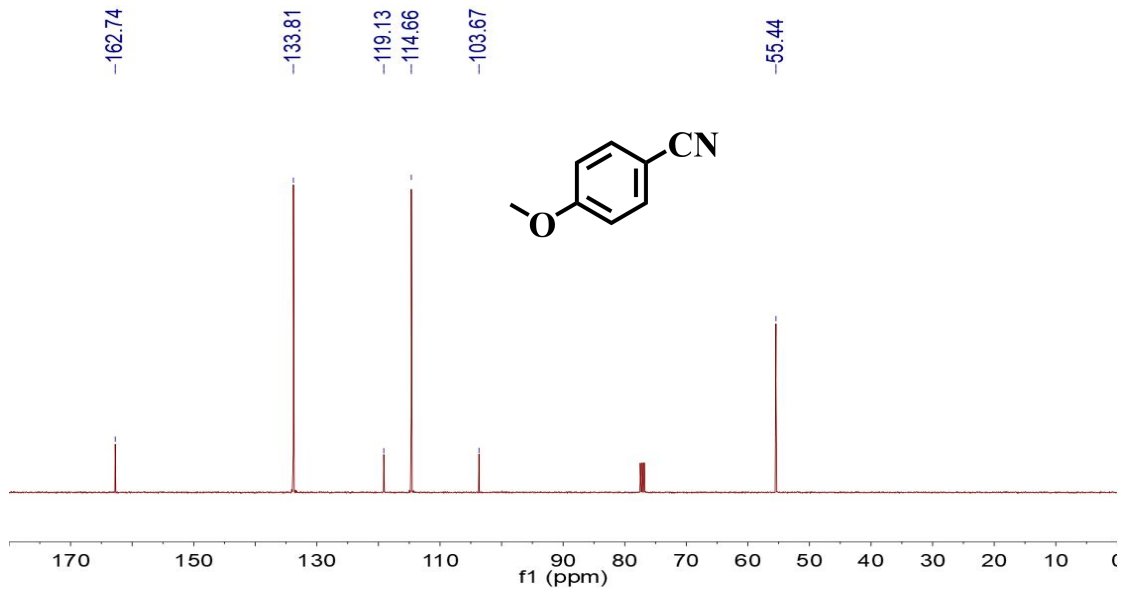



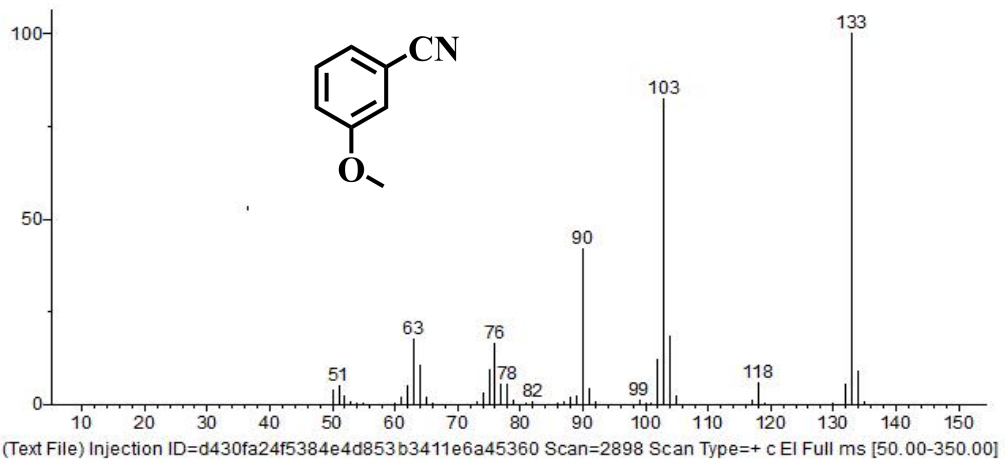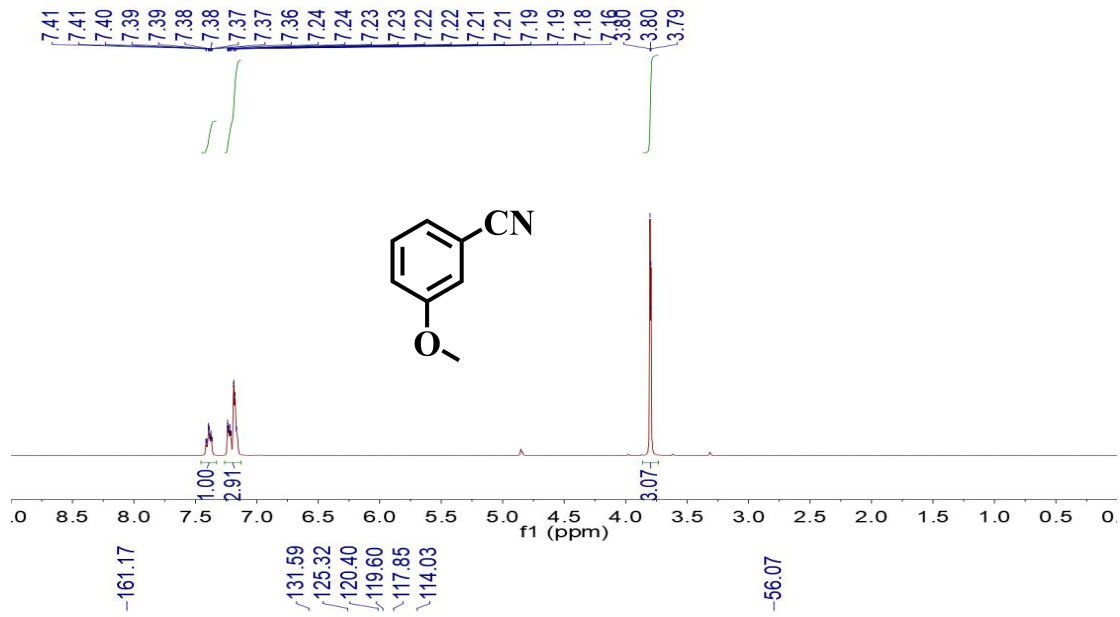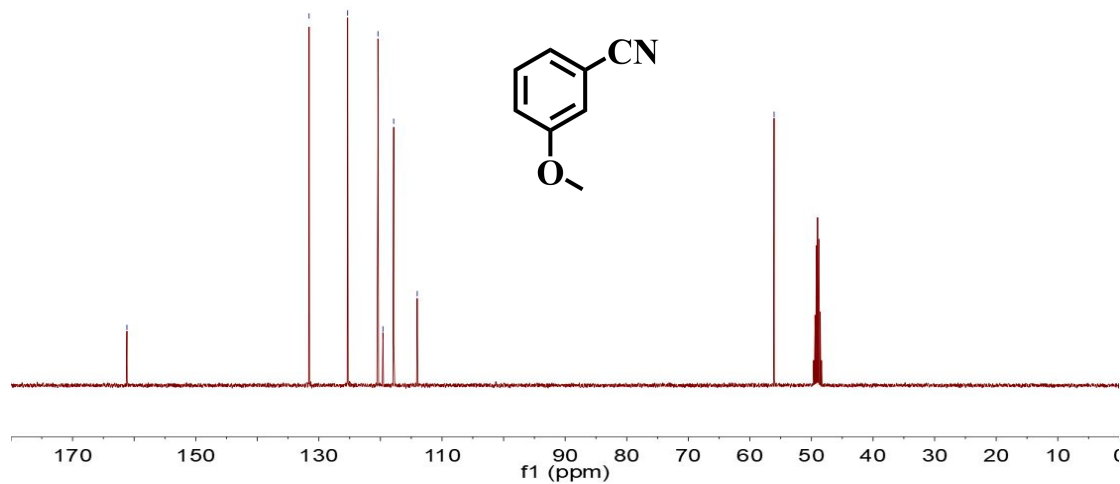

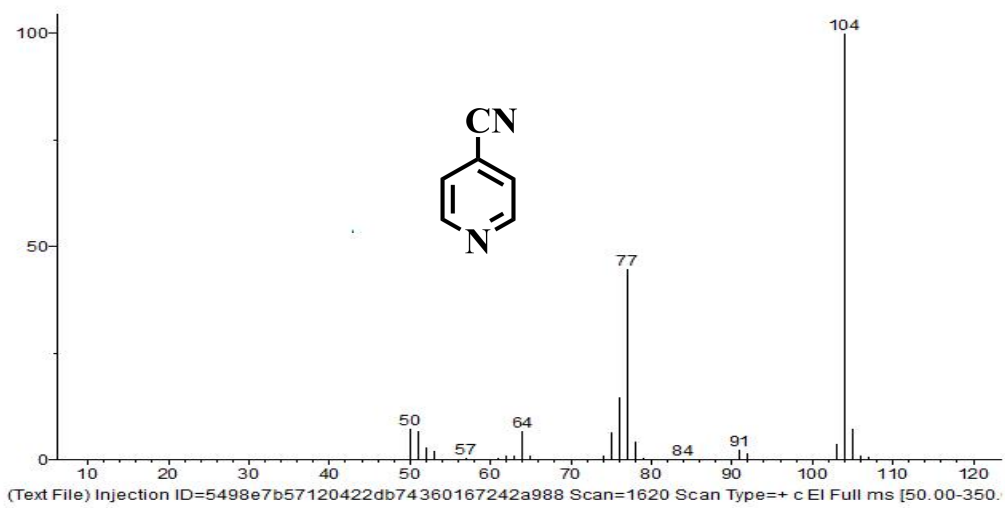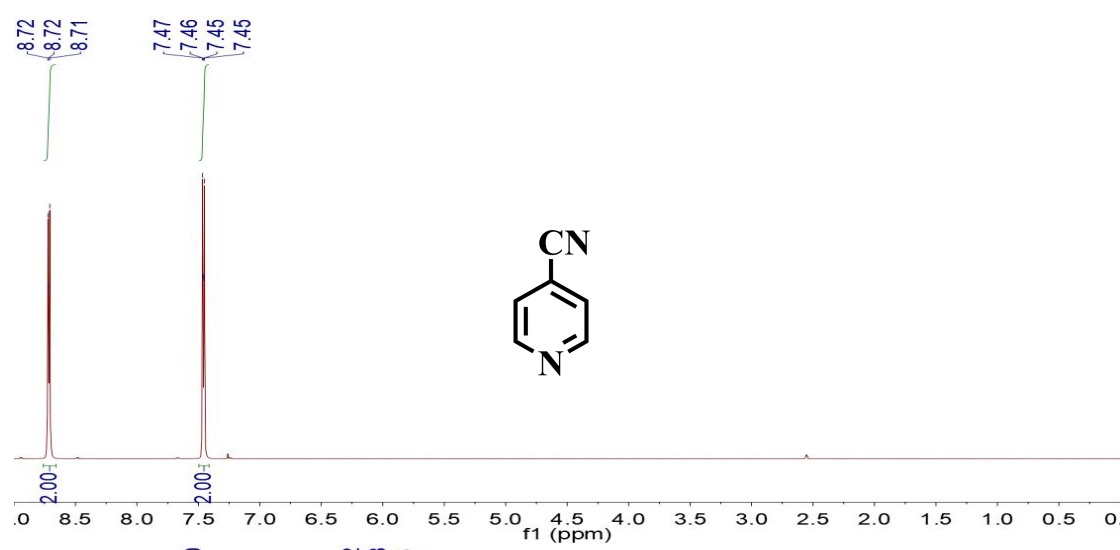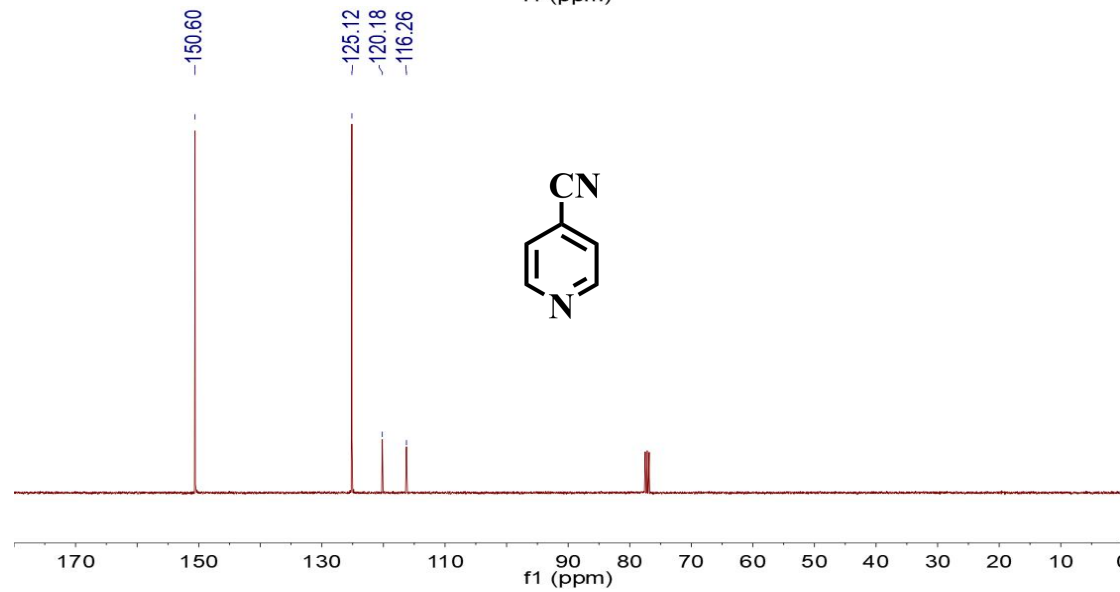

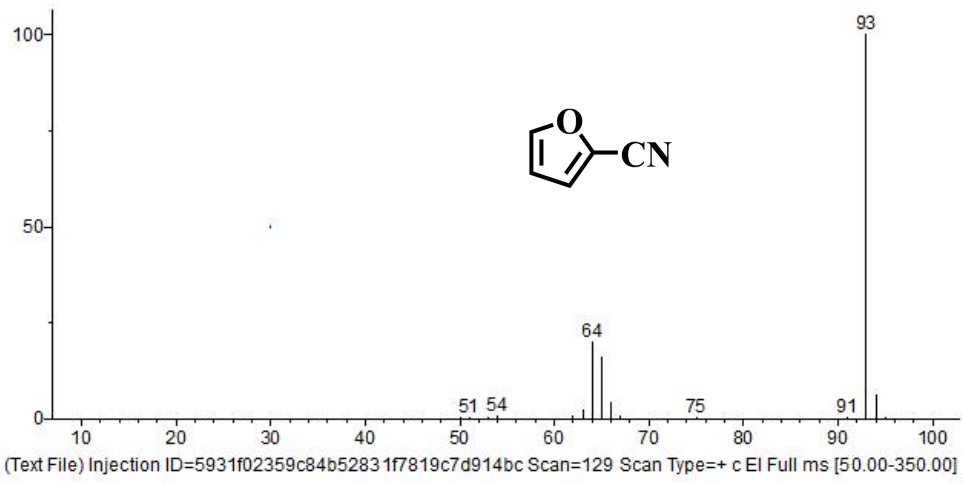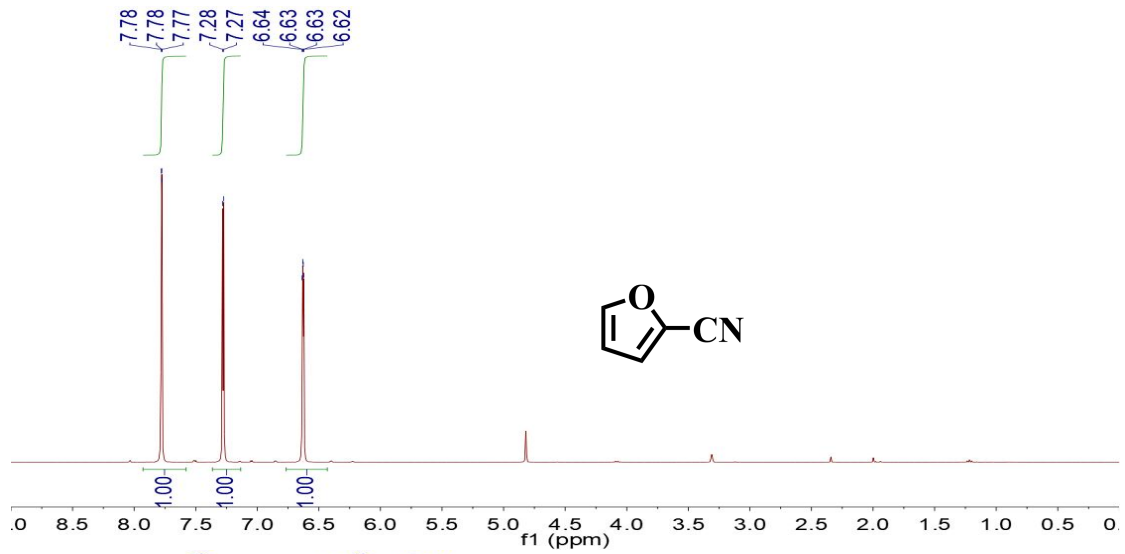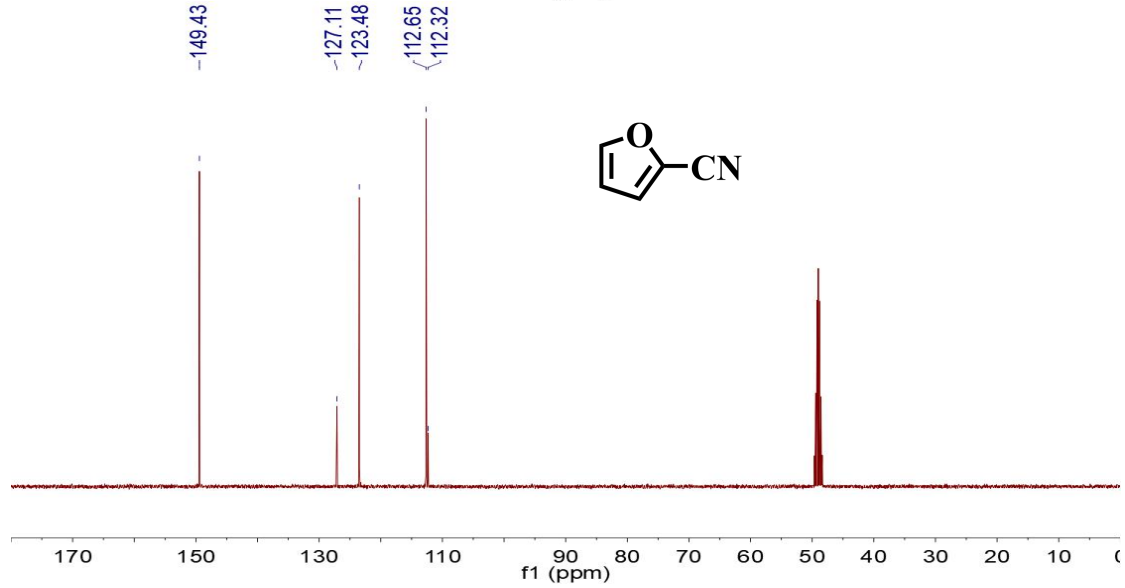

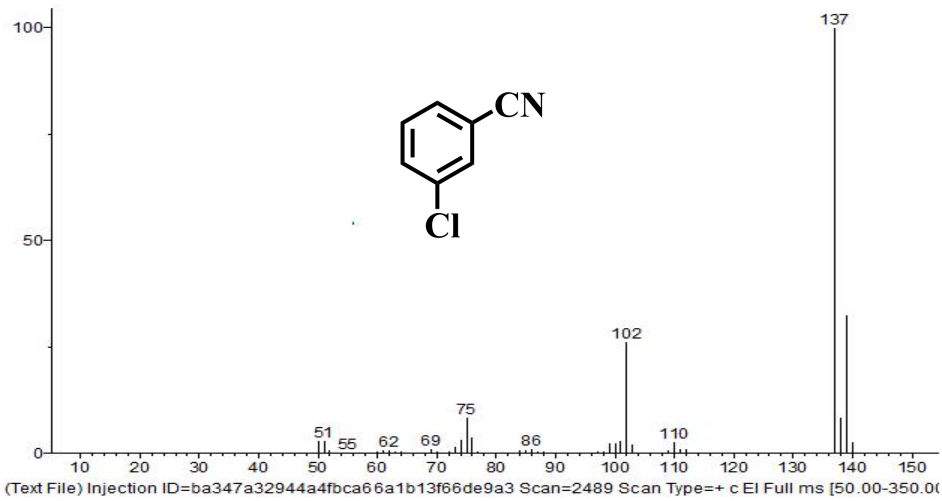

7.59  
7.59  
7.57  
7.57  
7.55  
7.55  
7.55  
7.54  
7.53  
7.52  
7.43  
7.41  
7.39

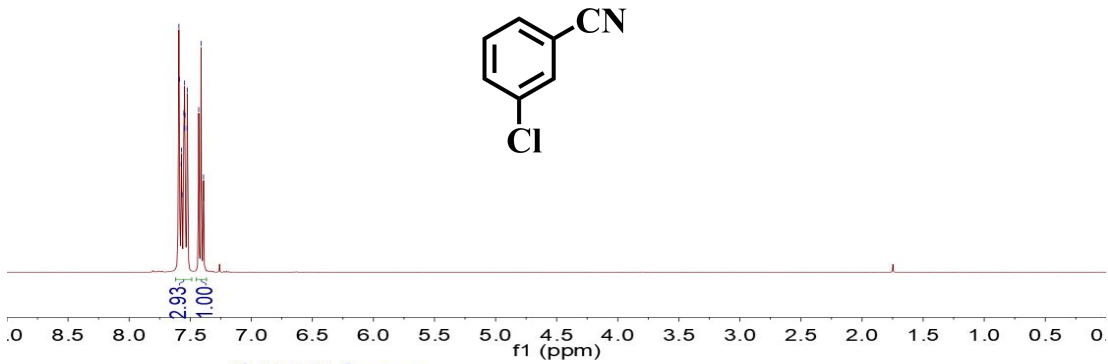

135.15  
133.22  
131.84  
130.52  
130.29  
117.41  
113.89

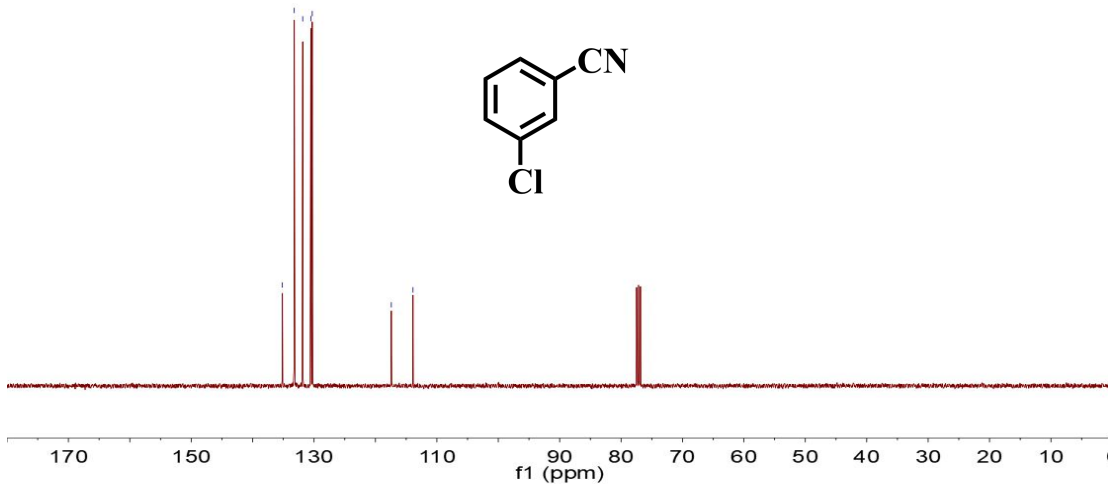

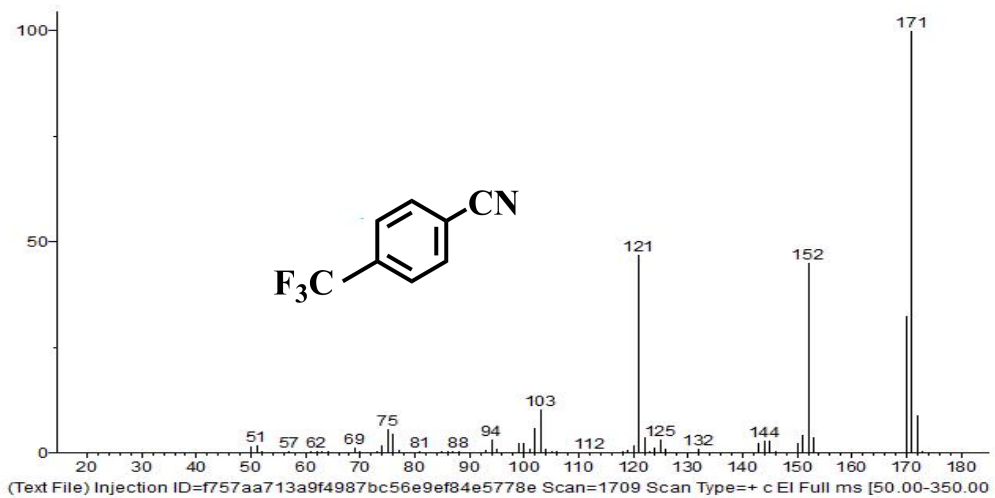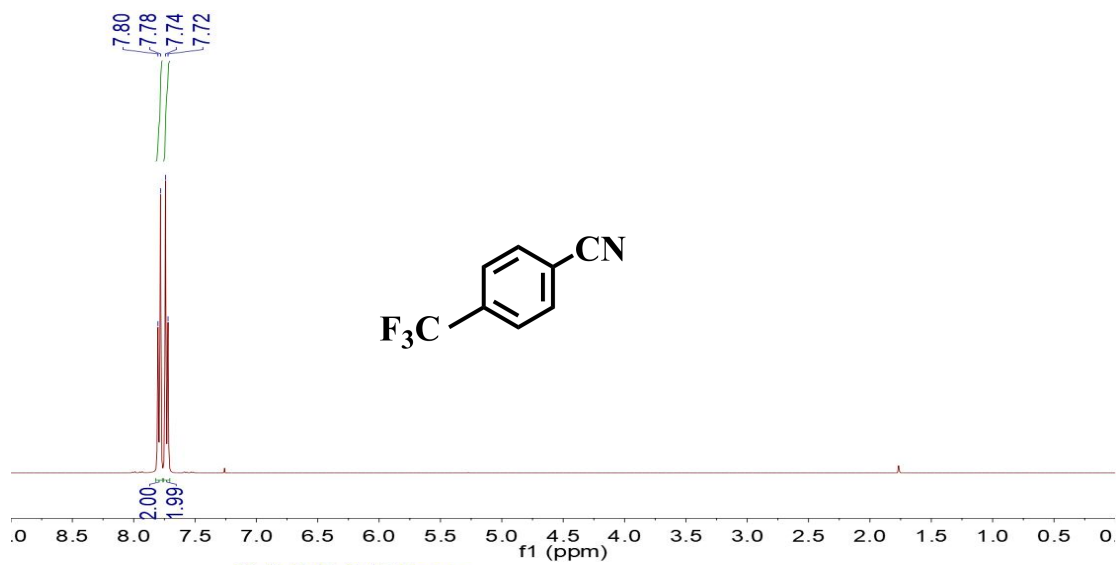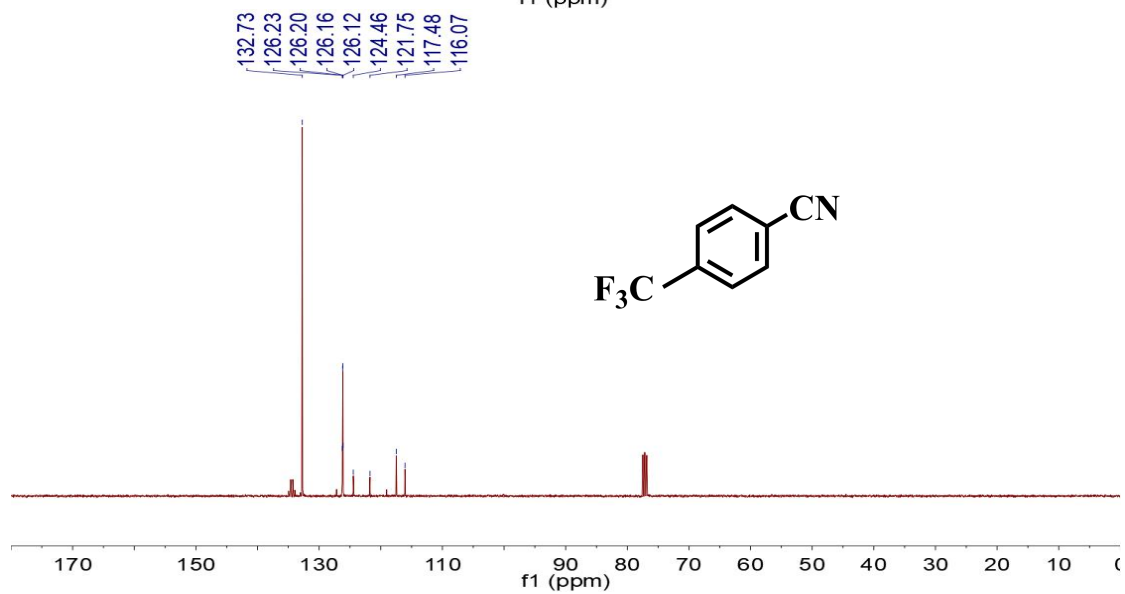

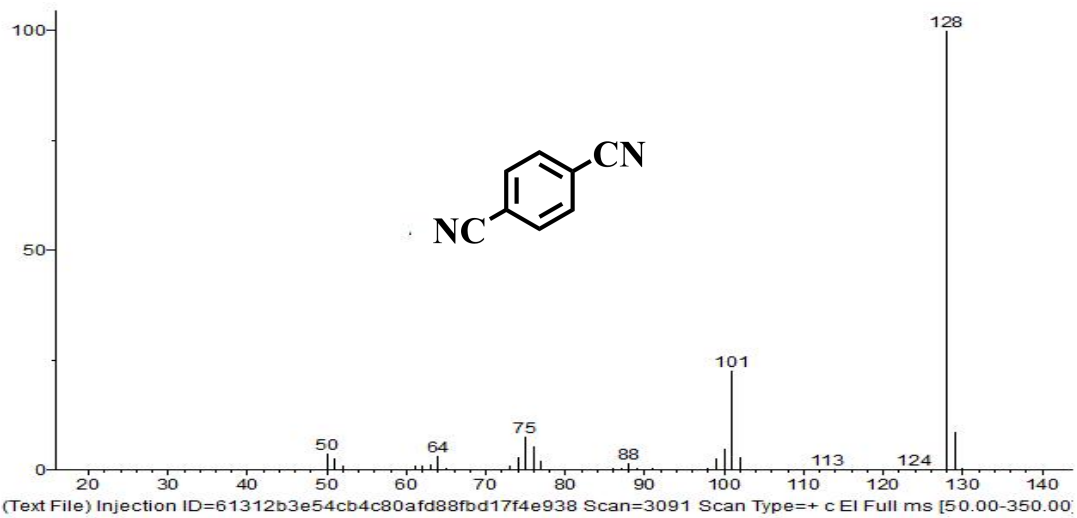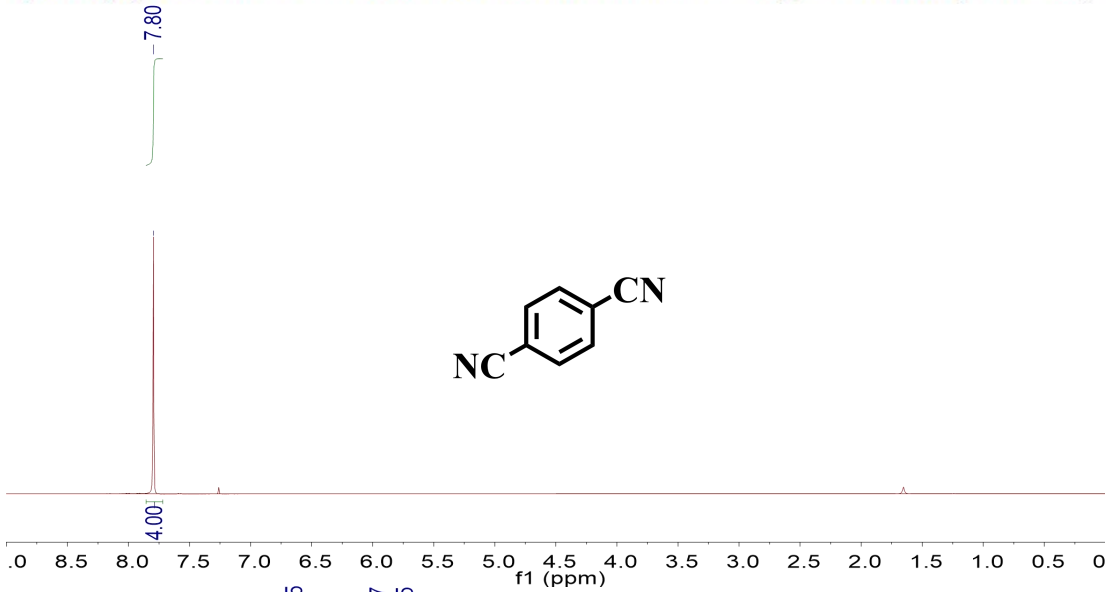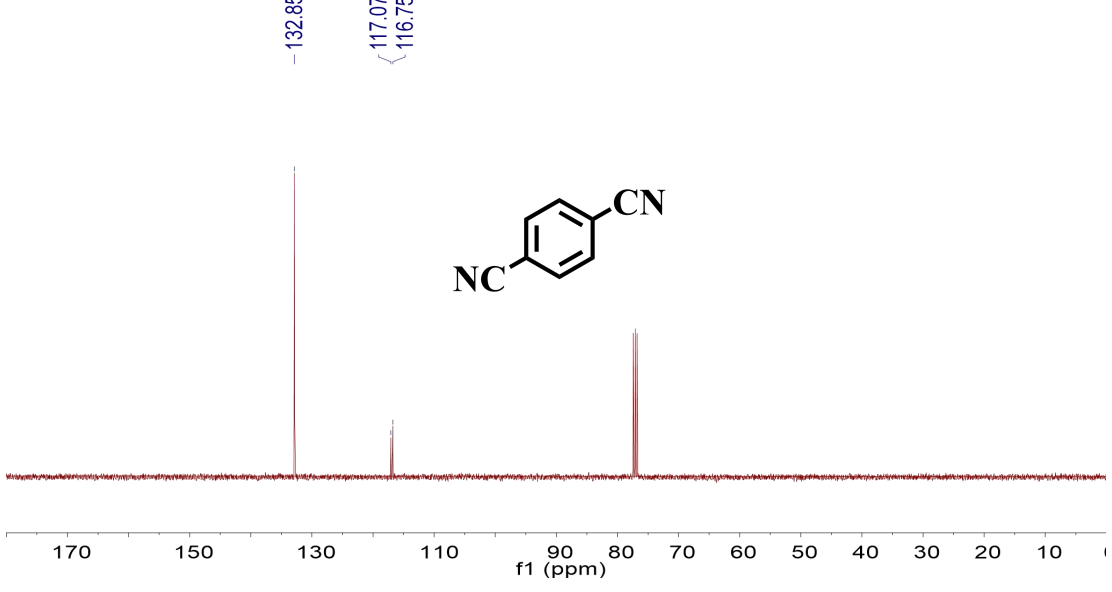

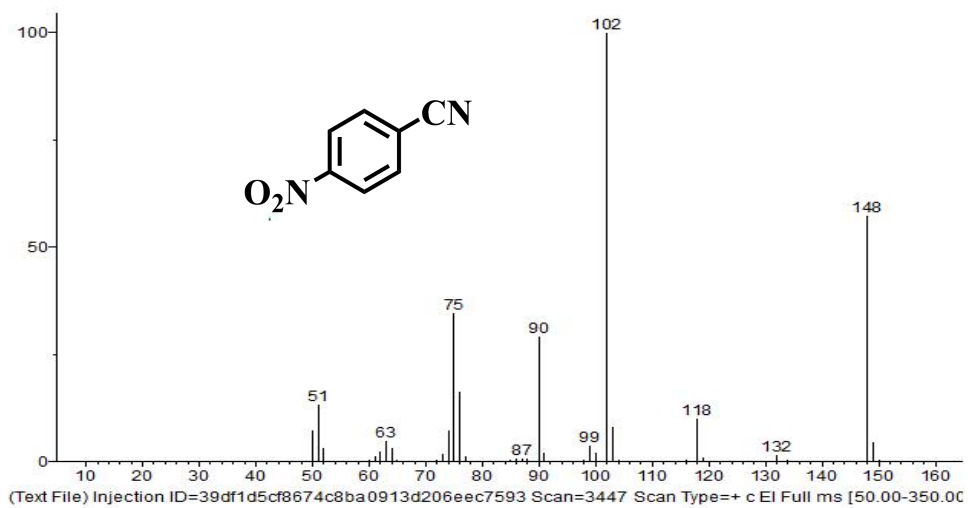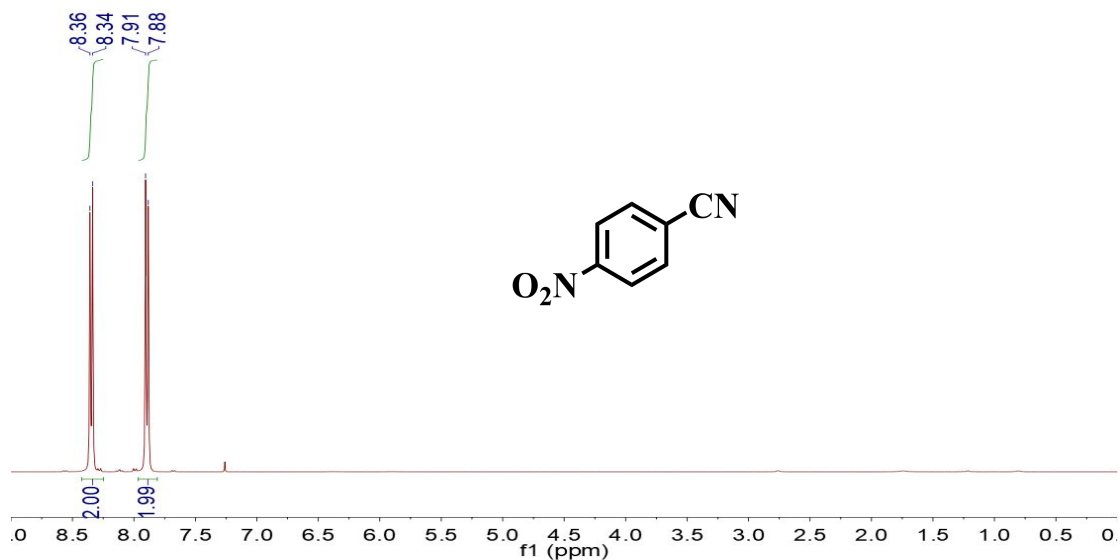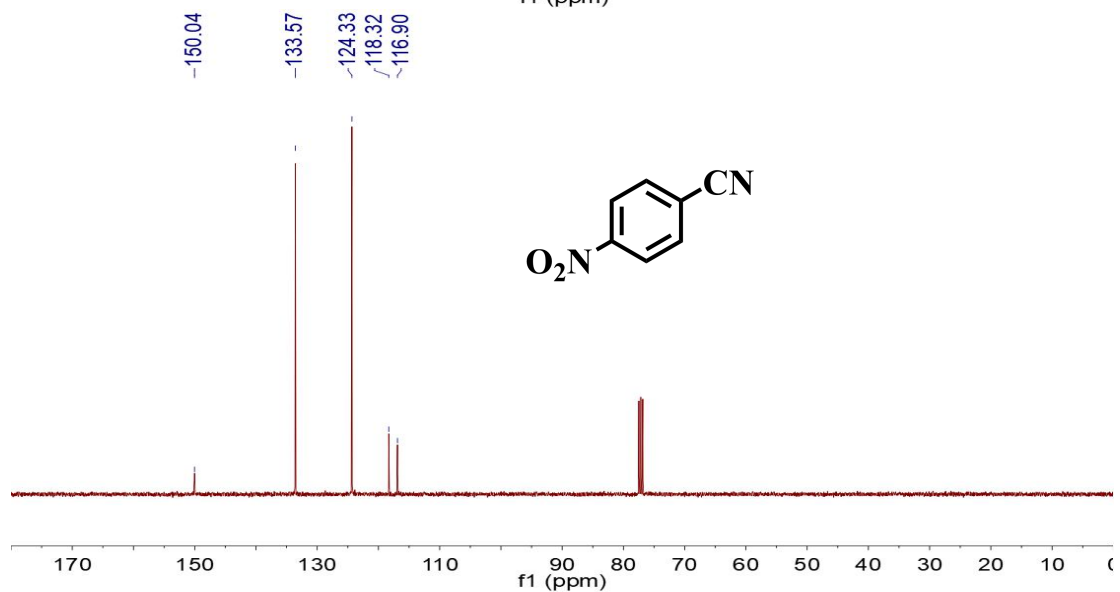

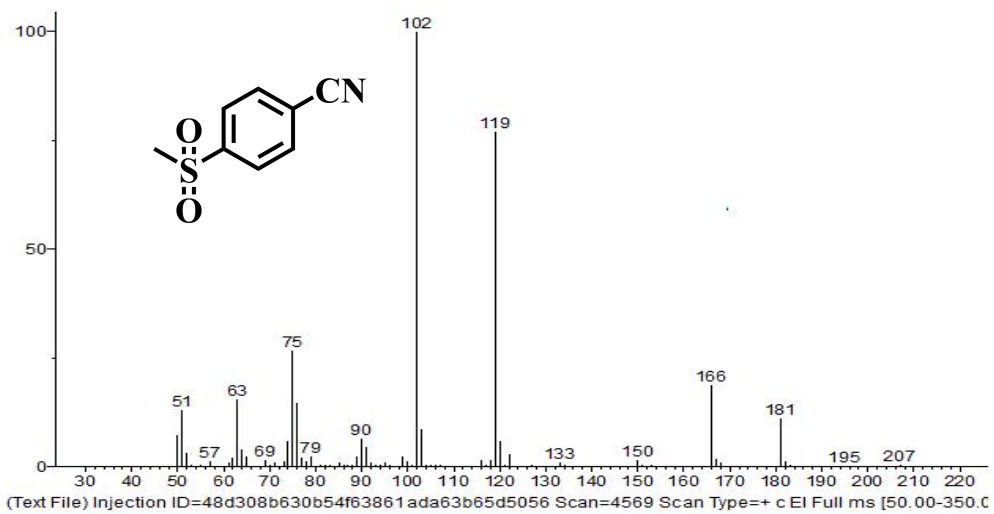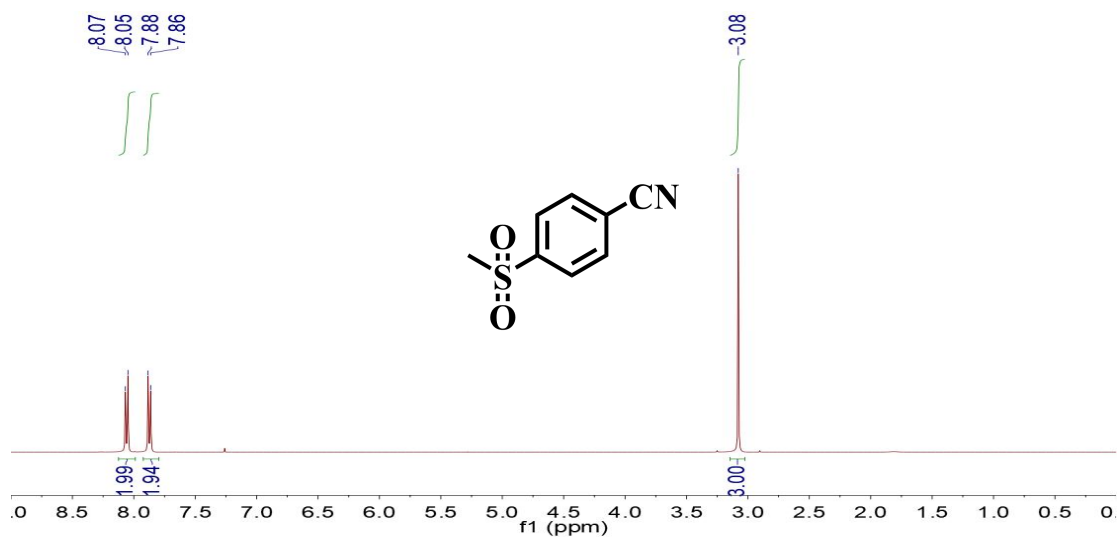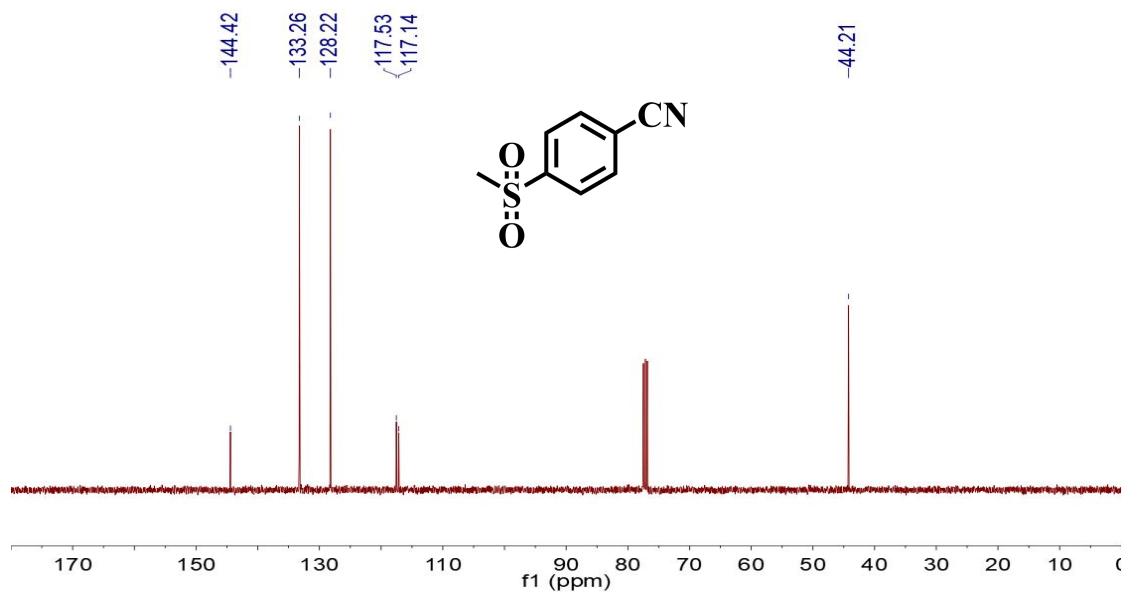



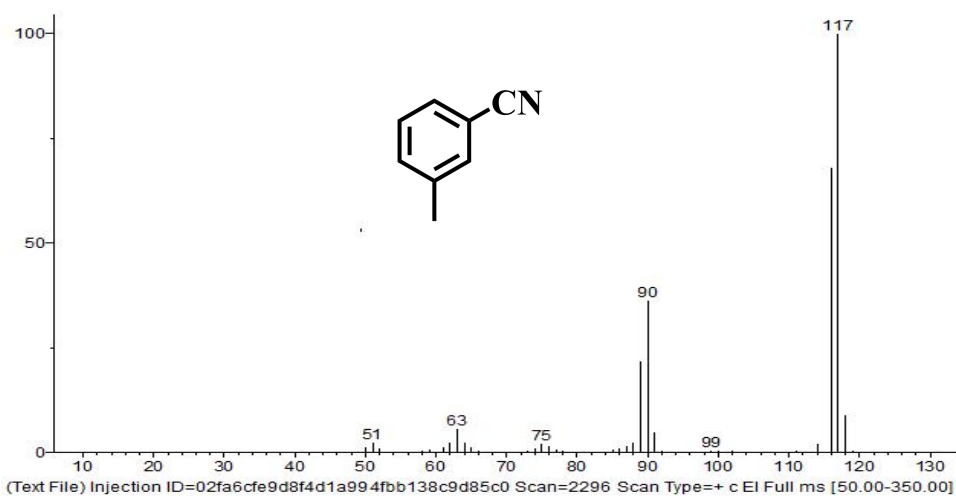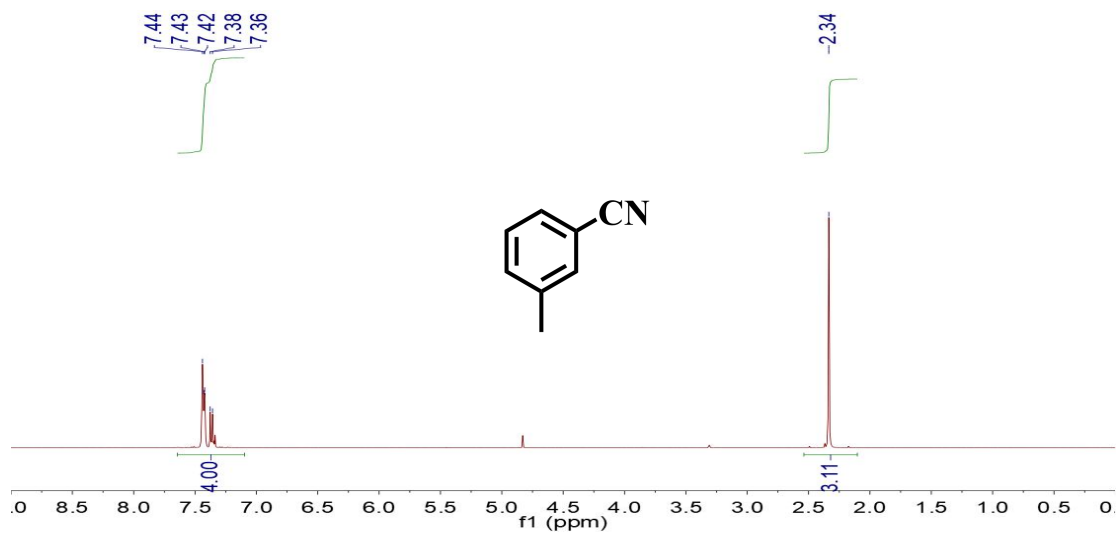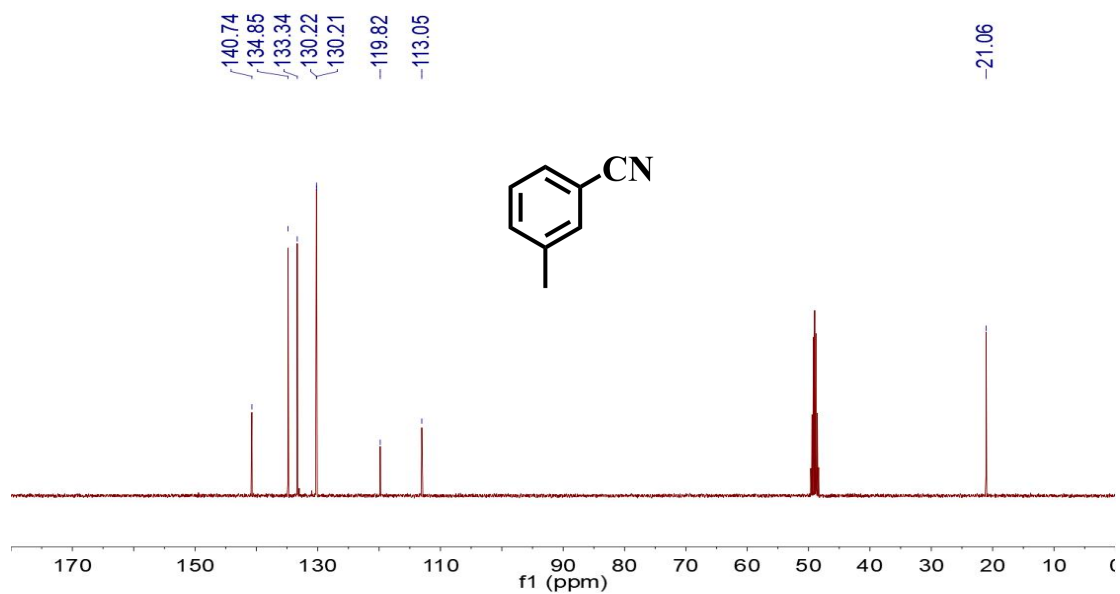

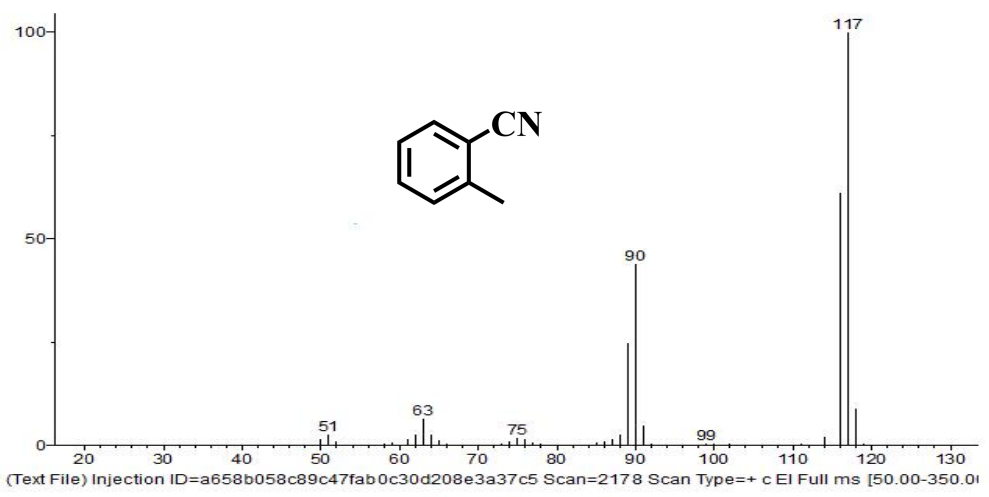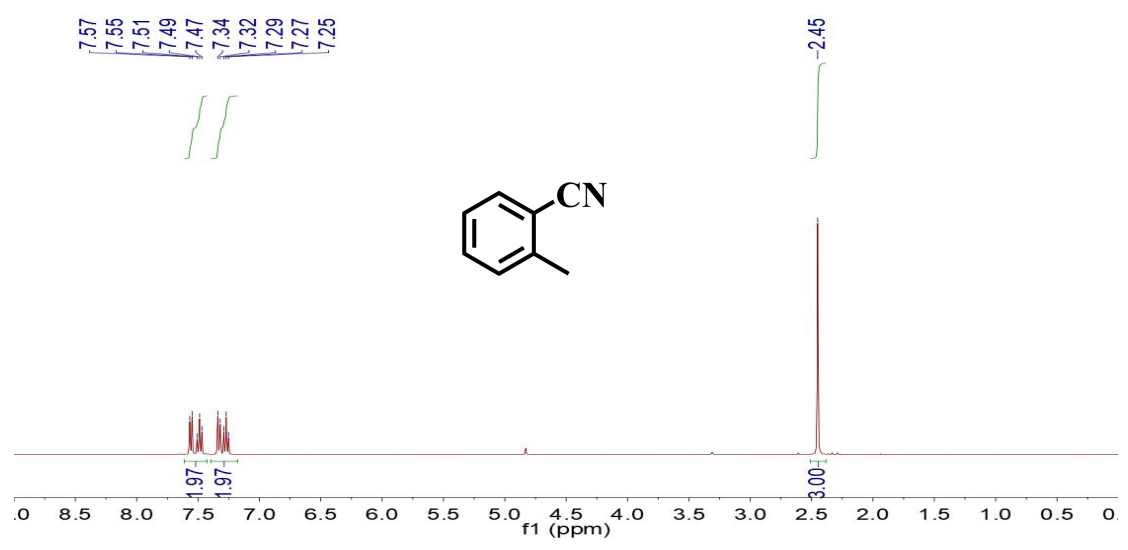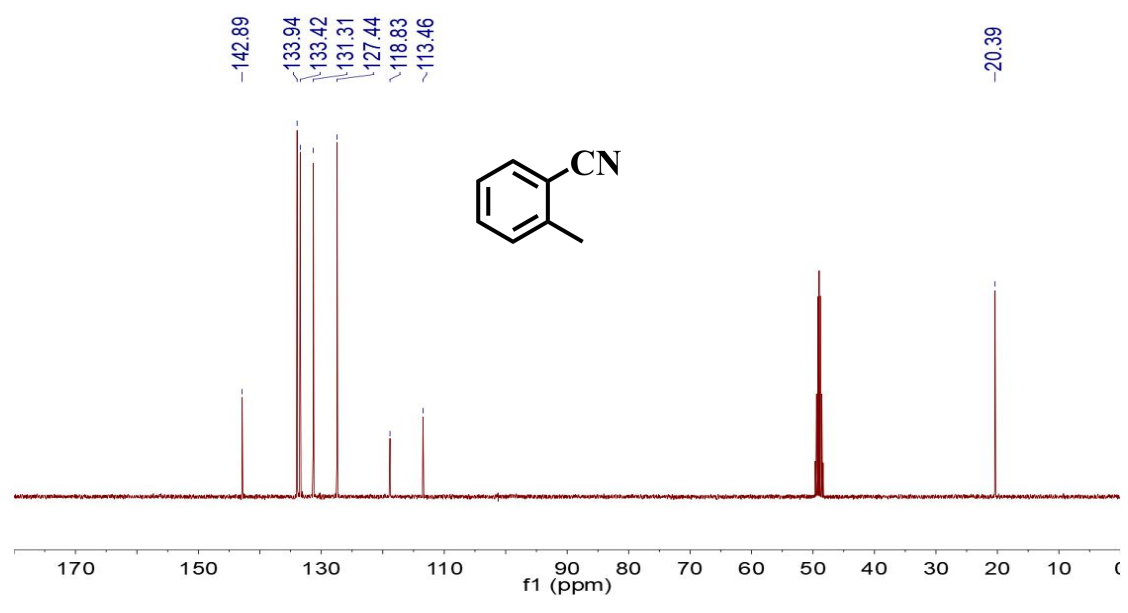

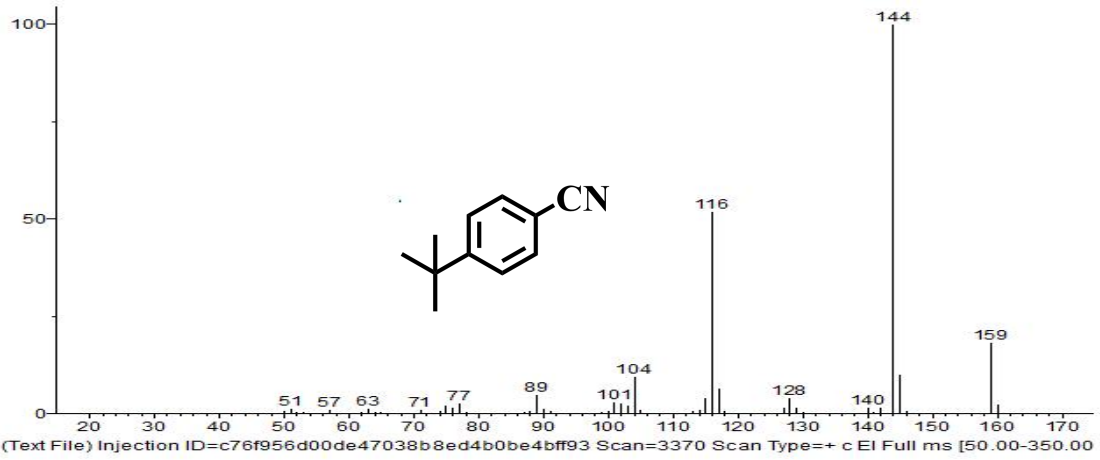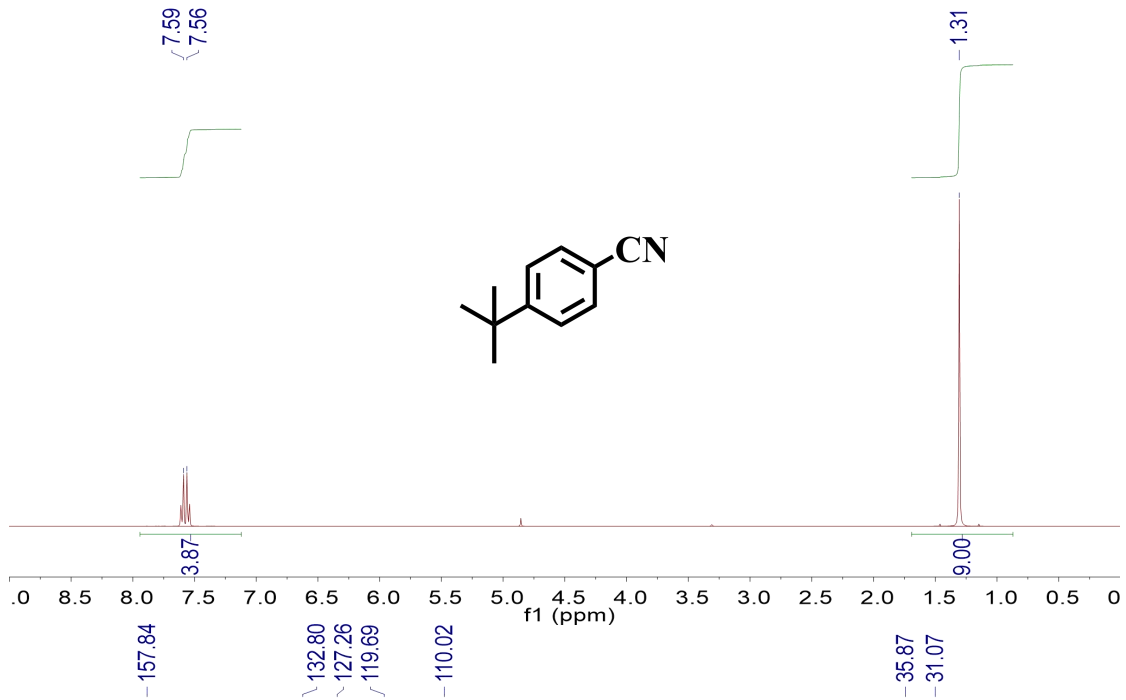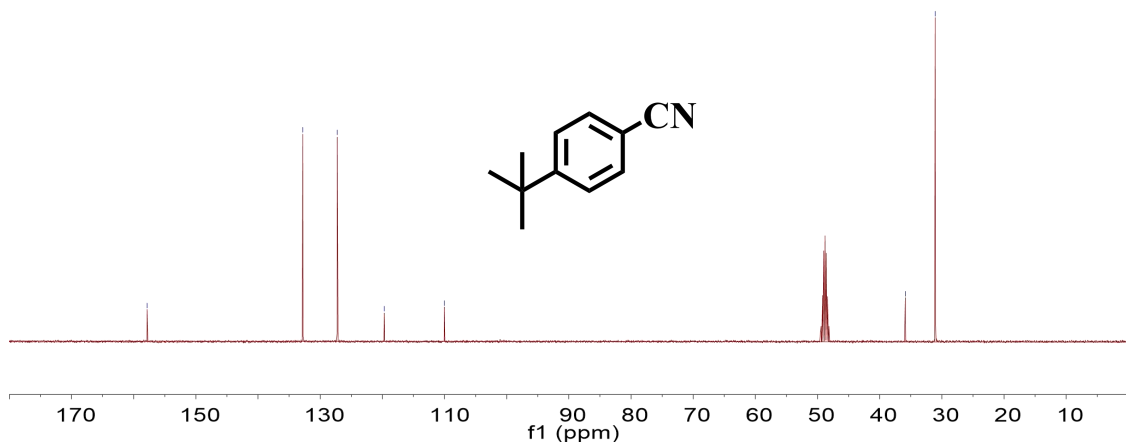

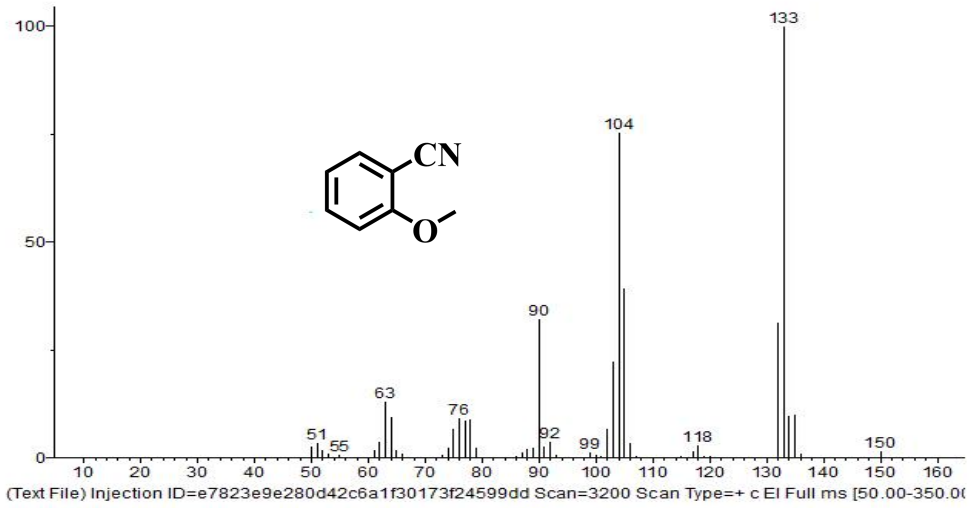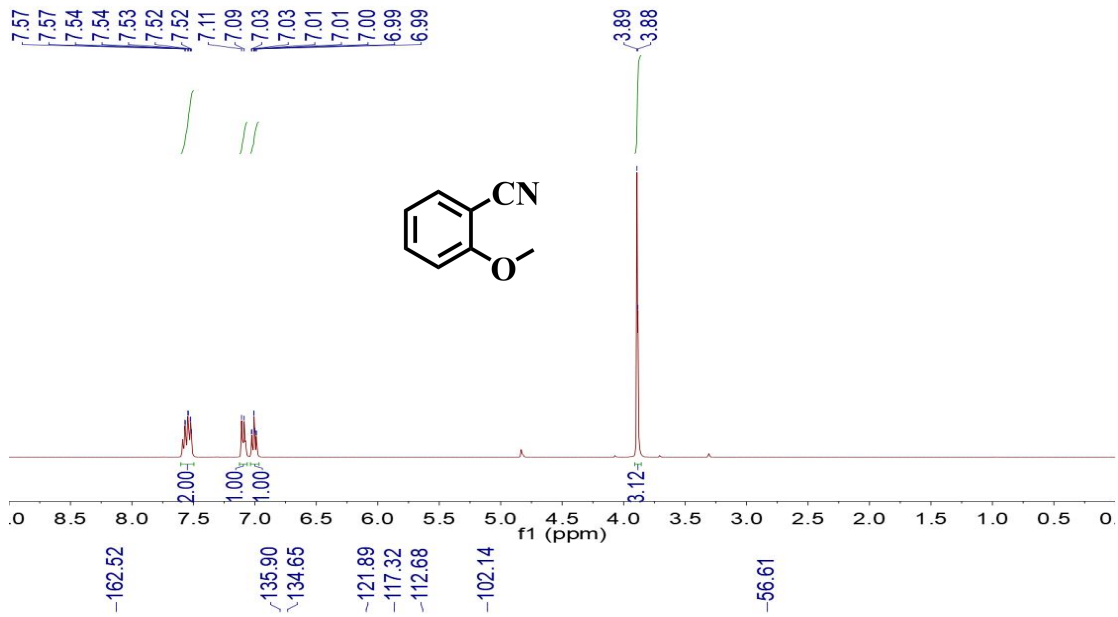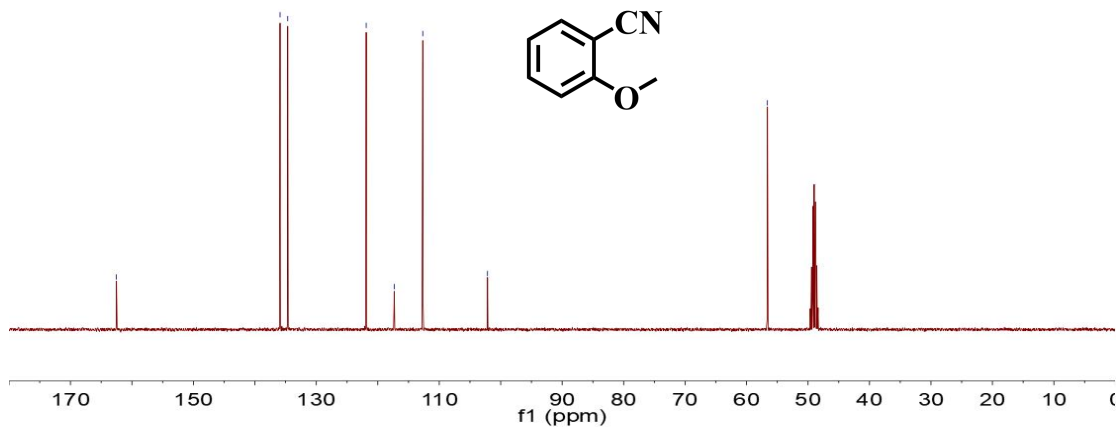

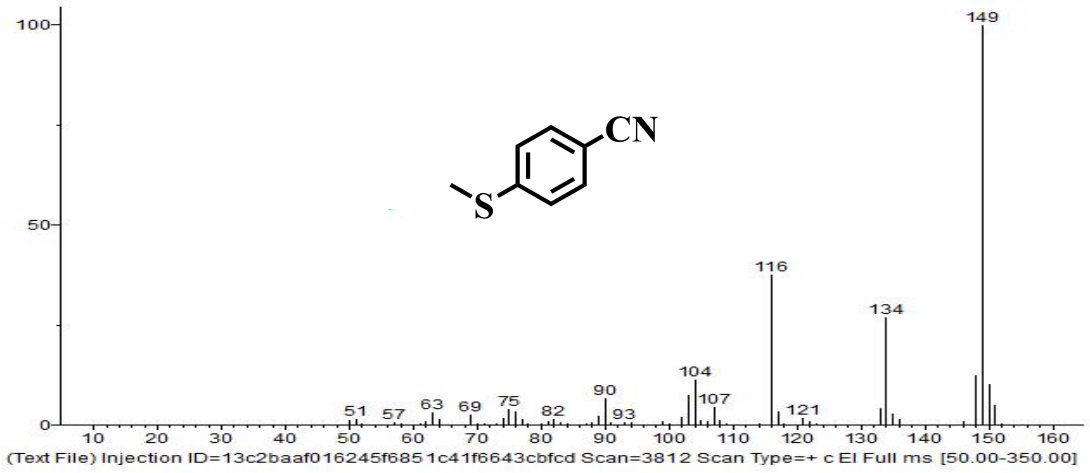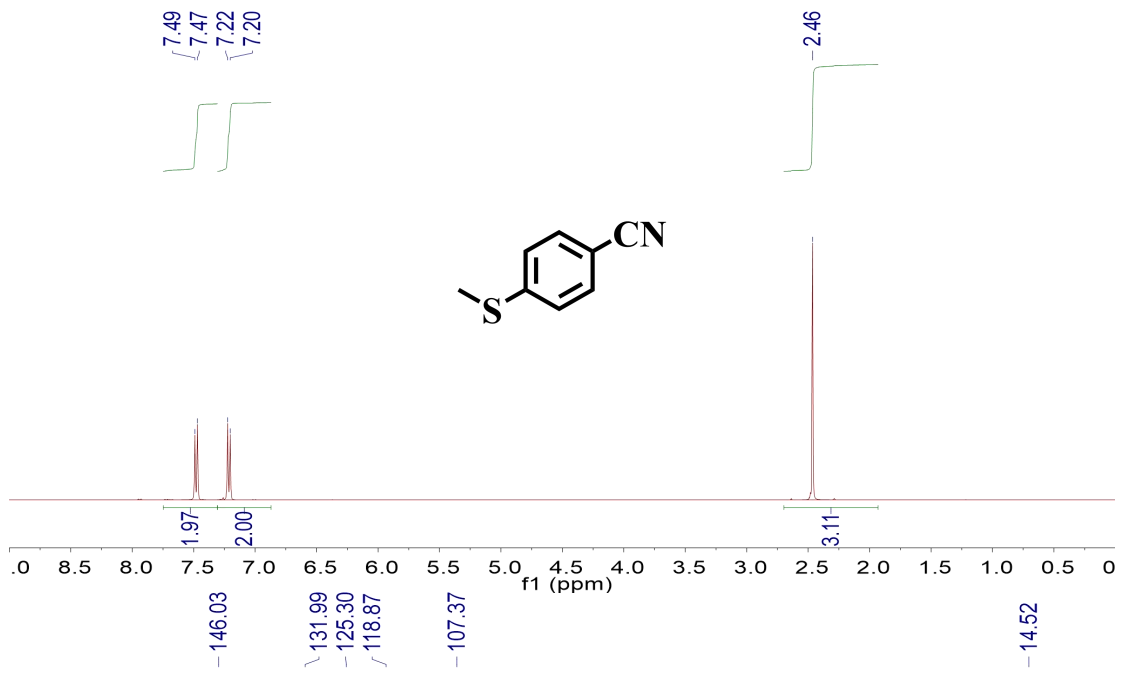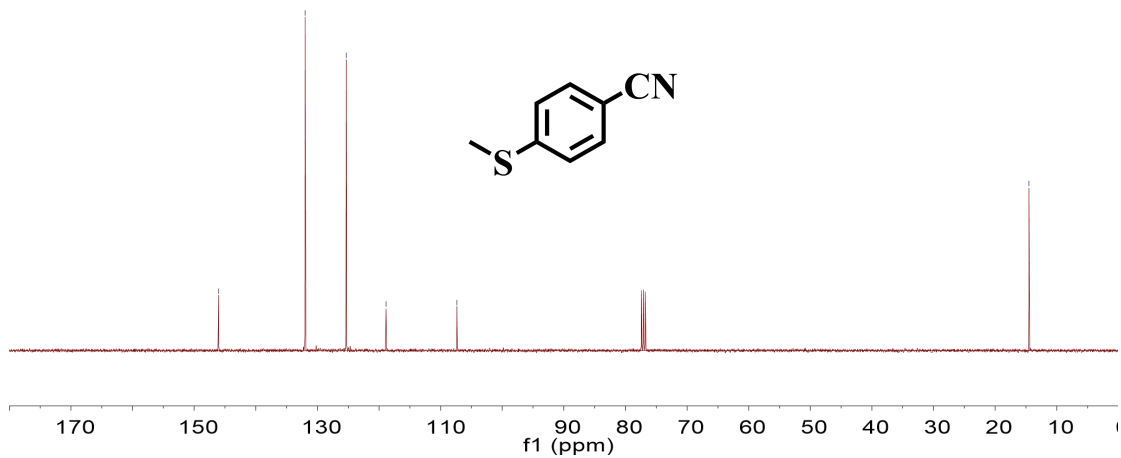

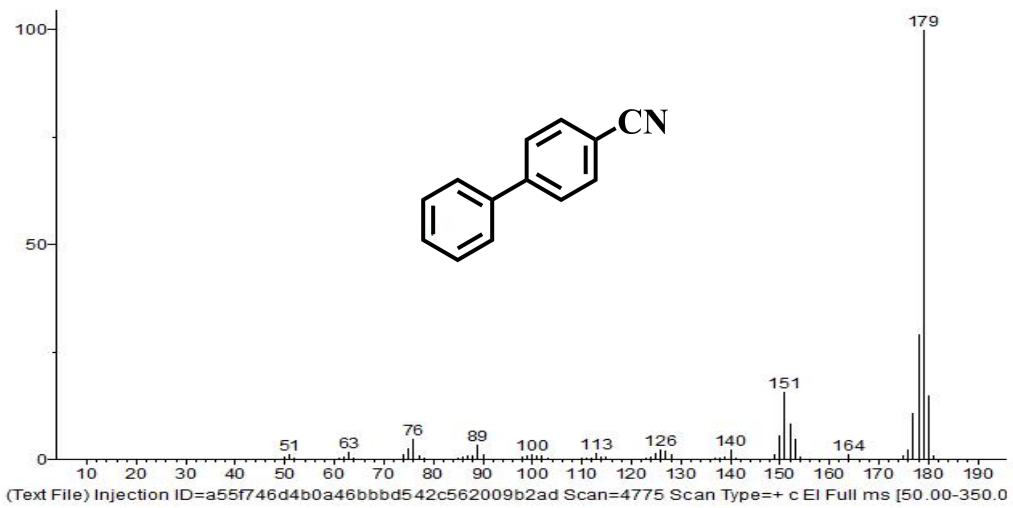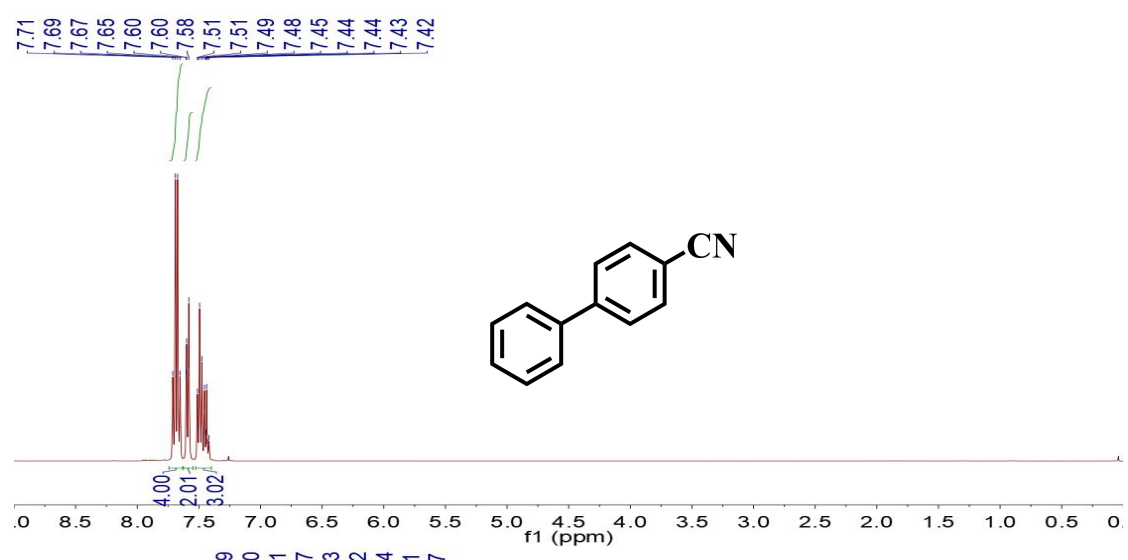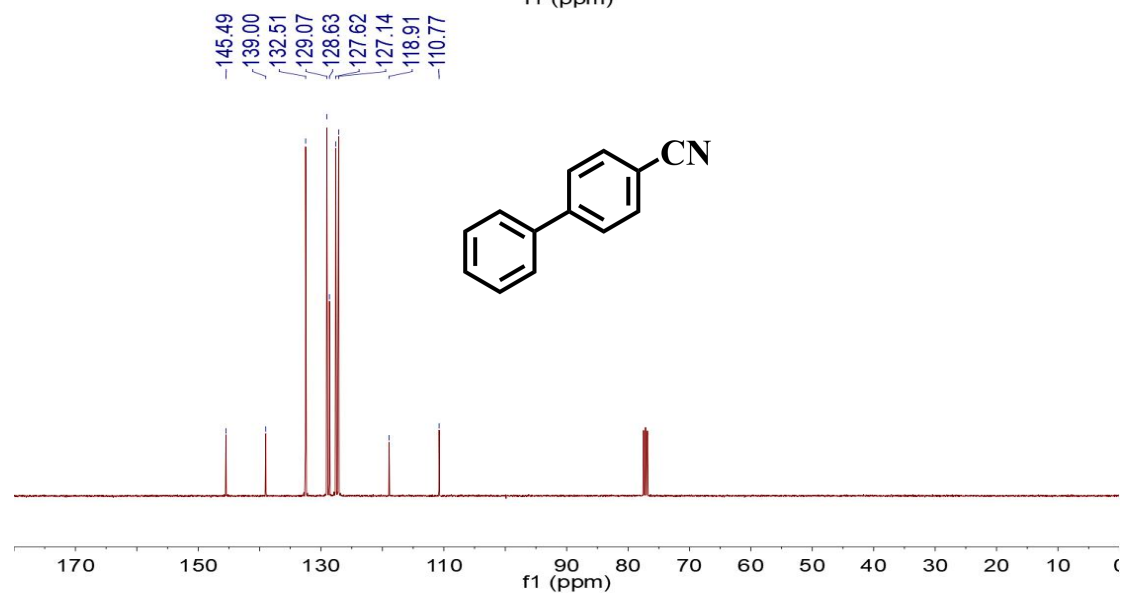

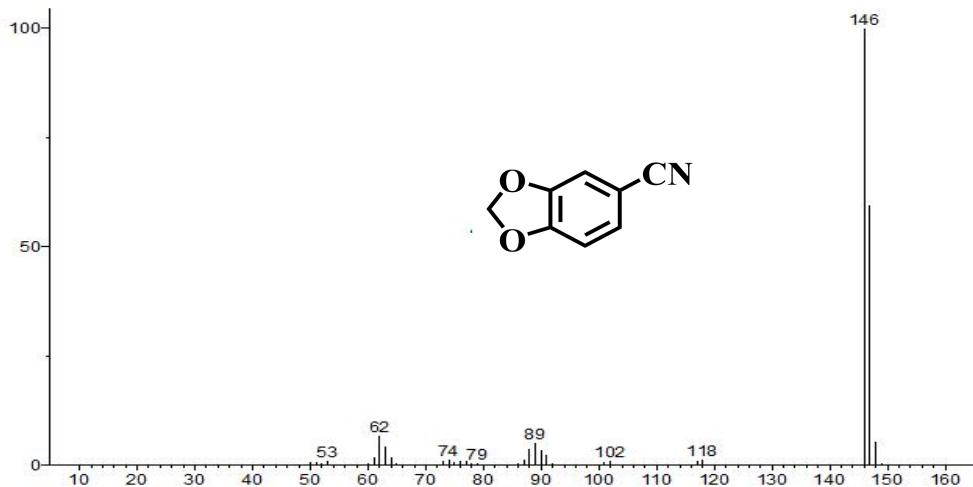

(Text File) Injection ID=e481a6eed7114847afe8da963e8e0c0b Scan=3447 Scan Type=+ c EI Full ms [50.00-350.0

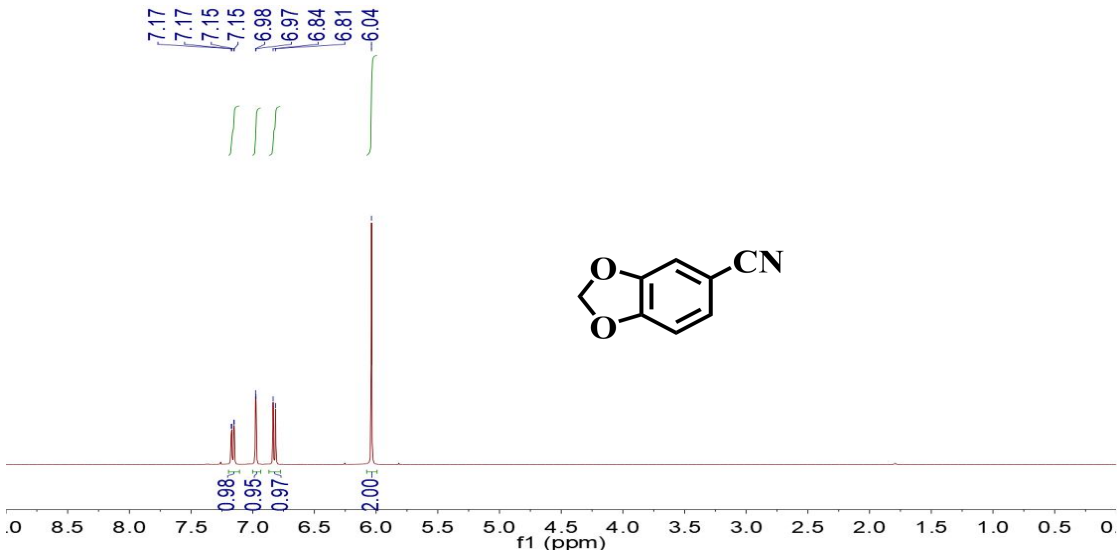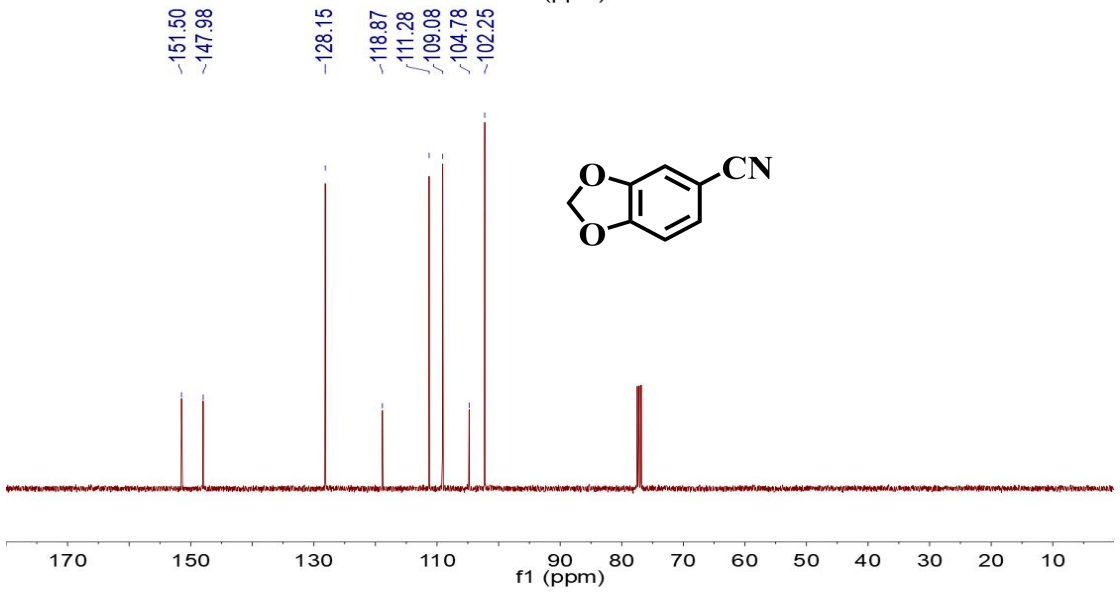

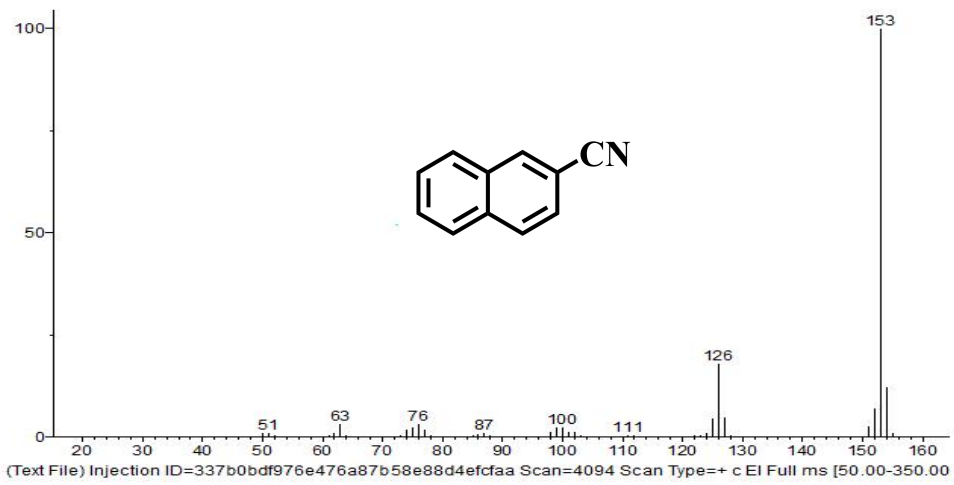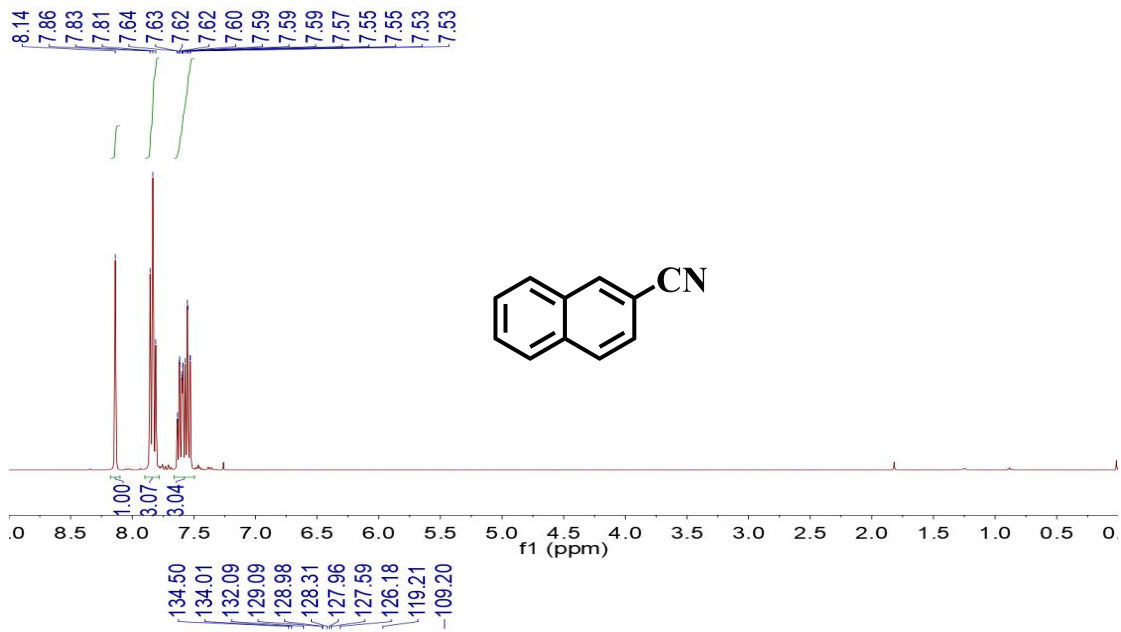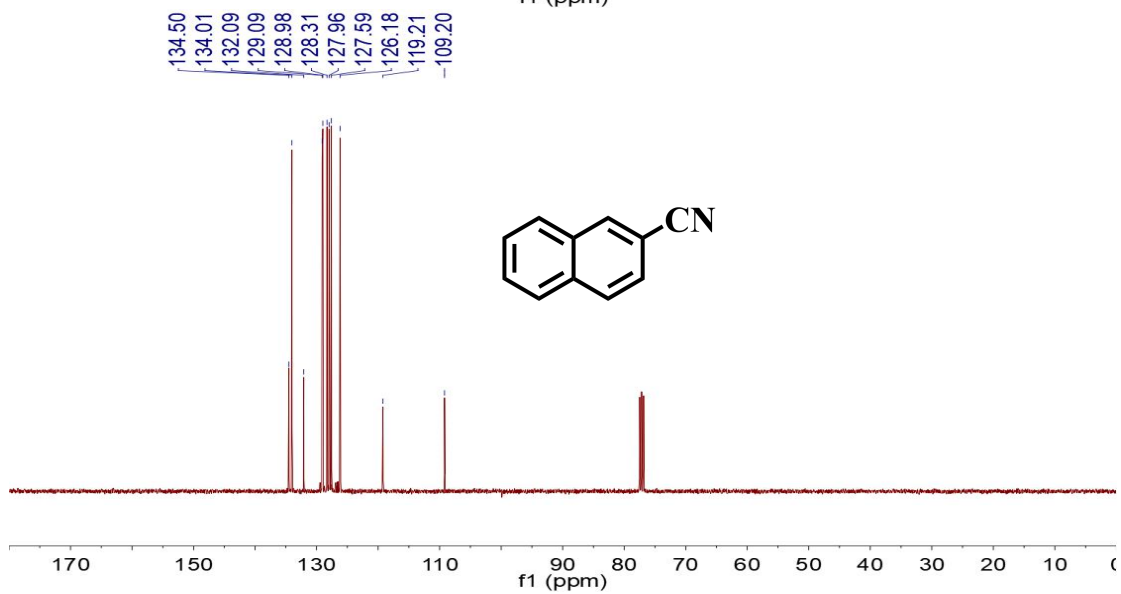



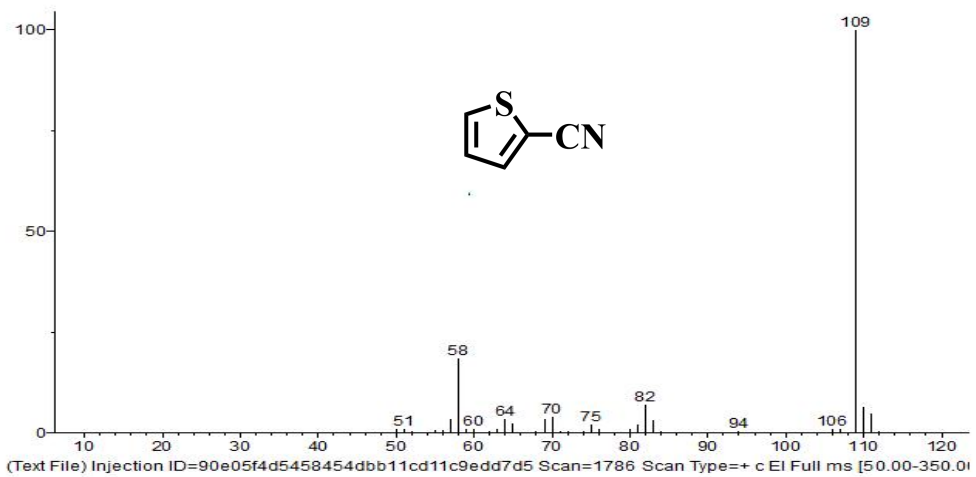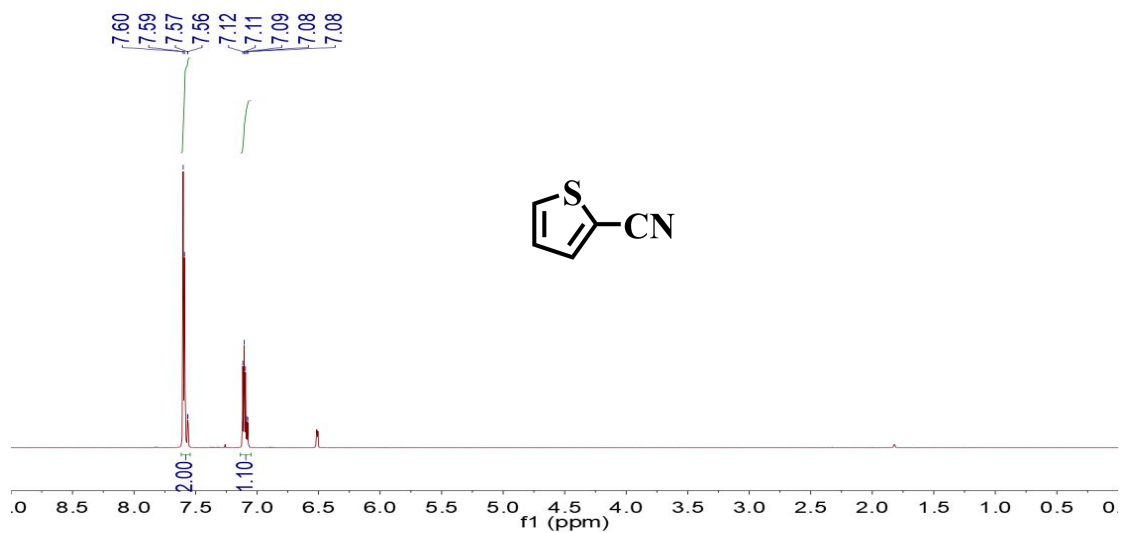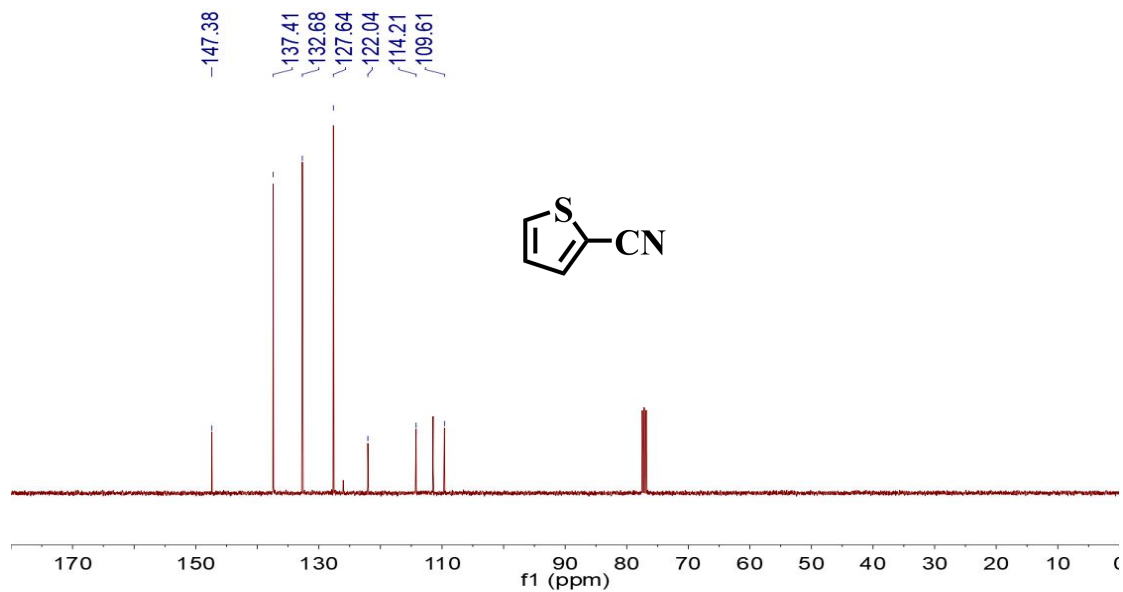

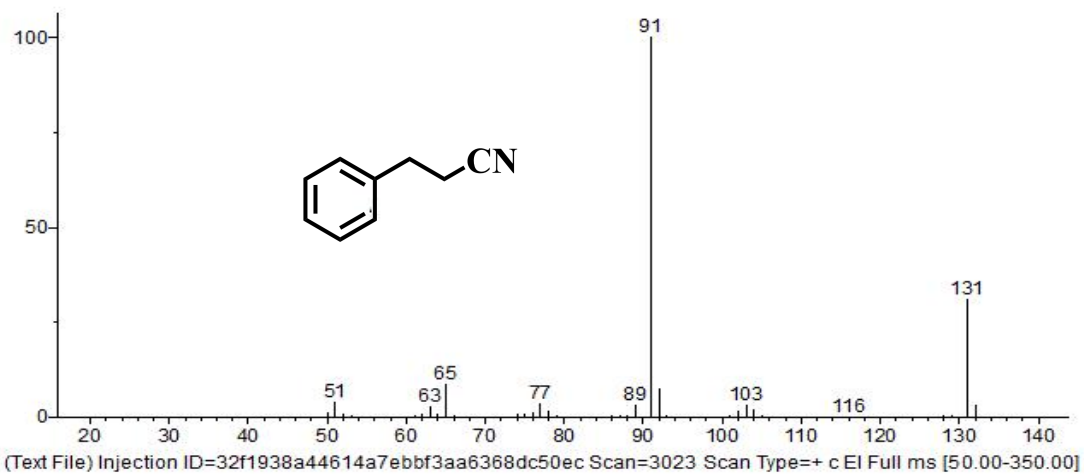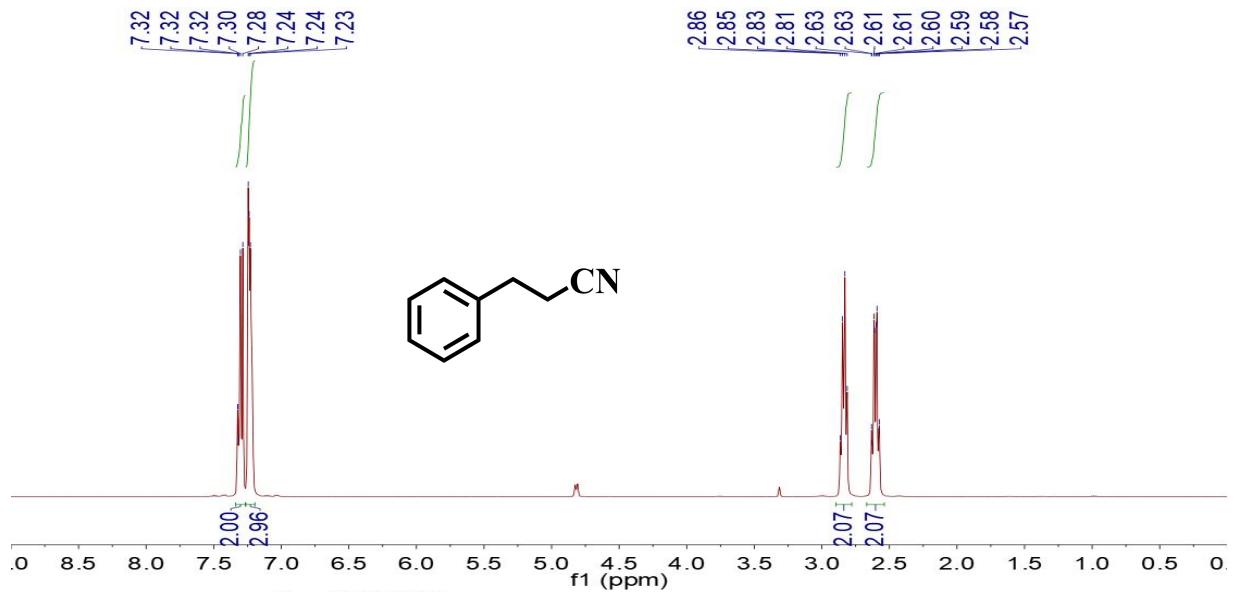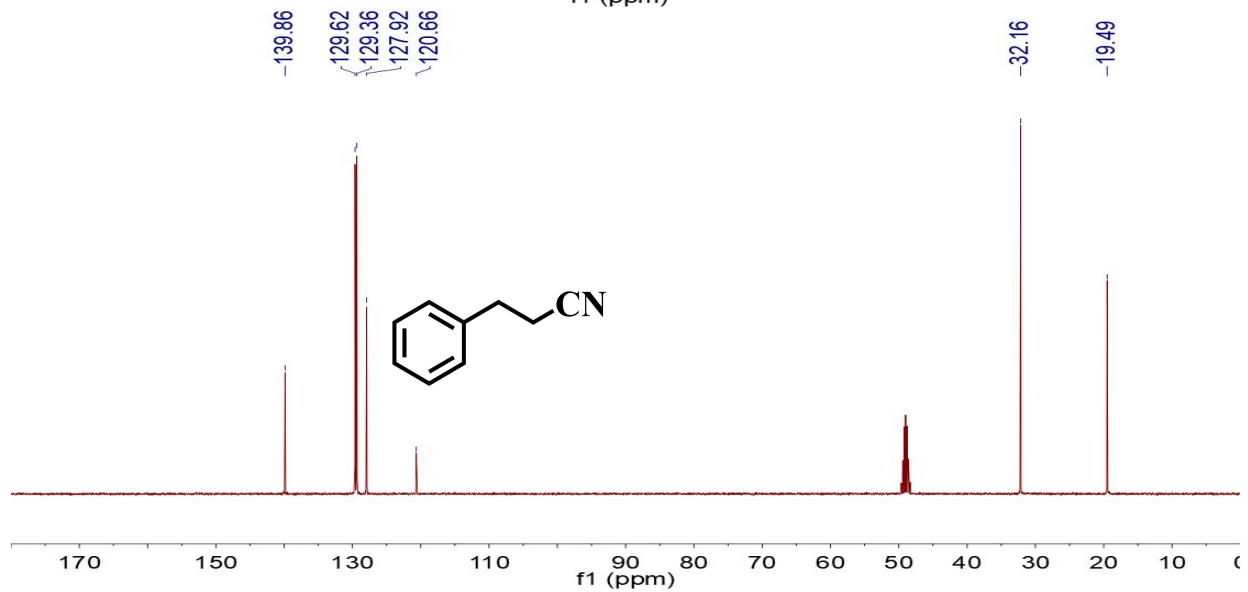

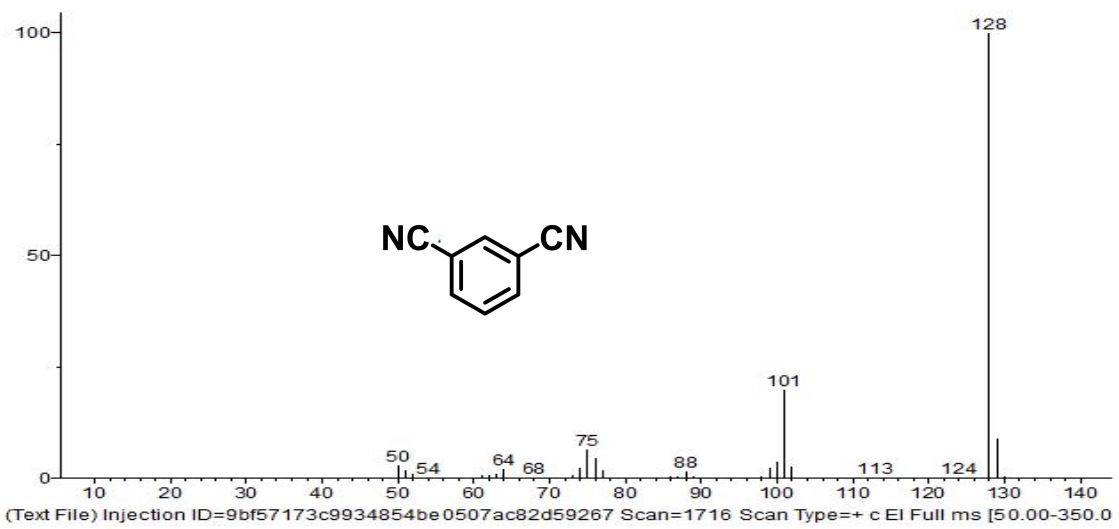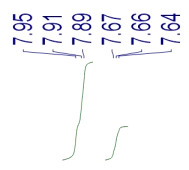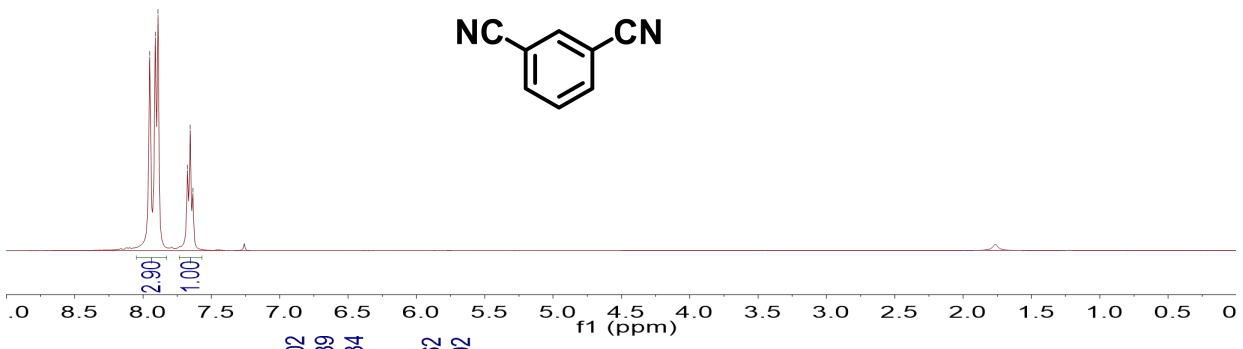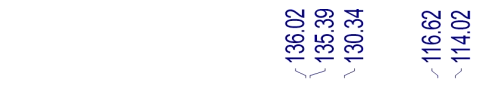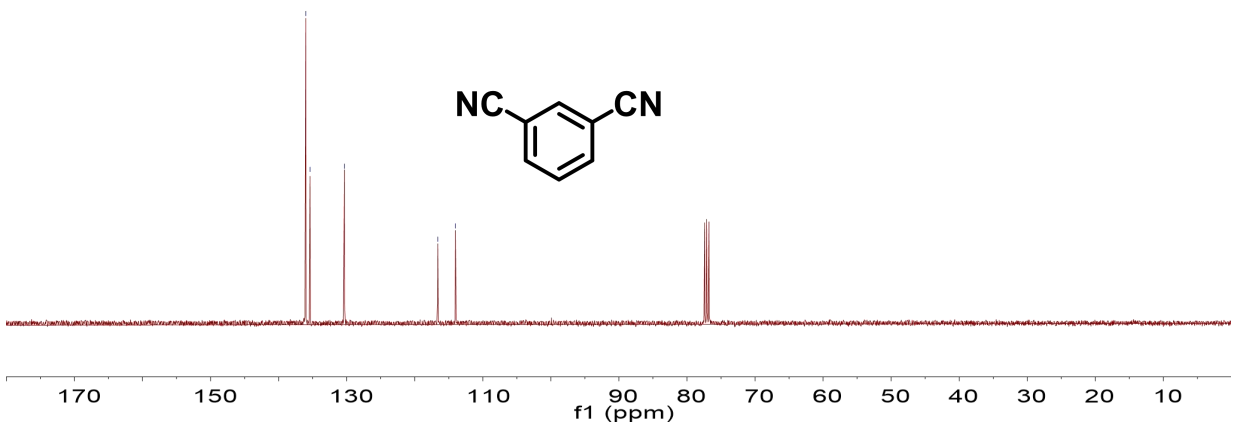

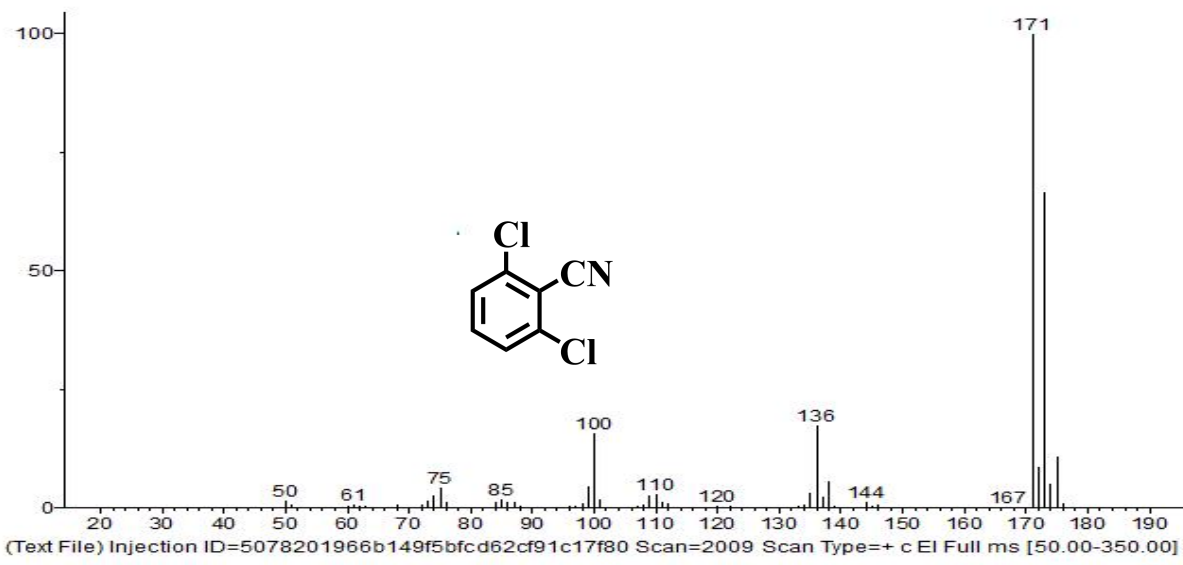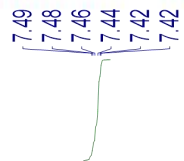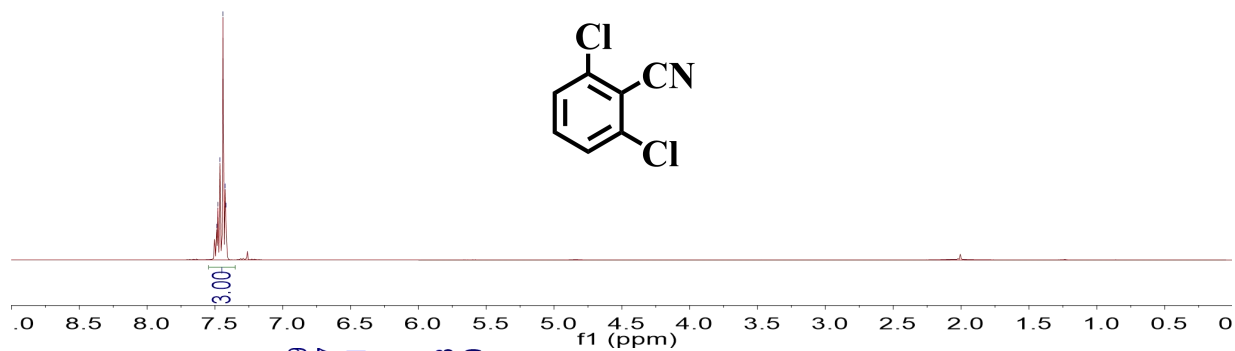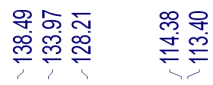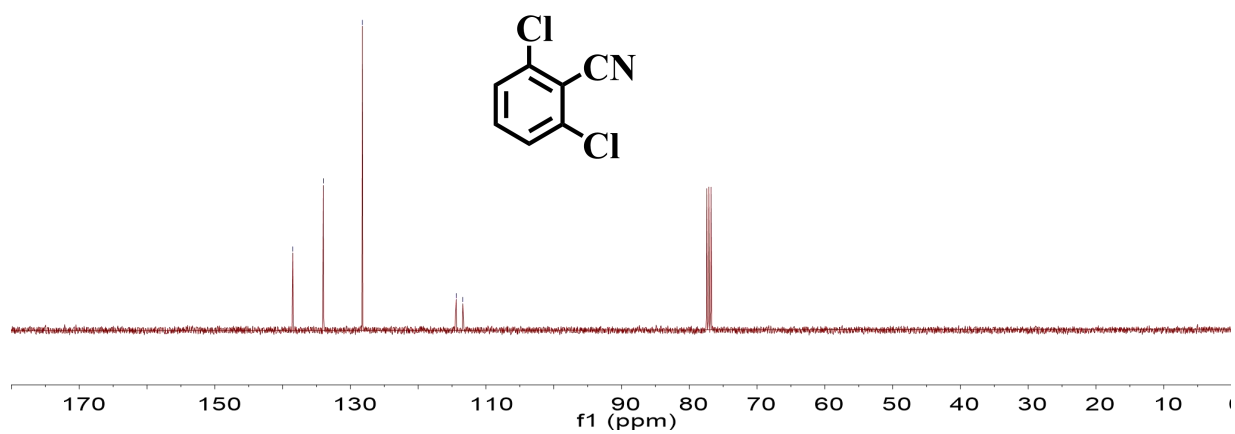

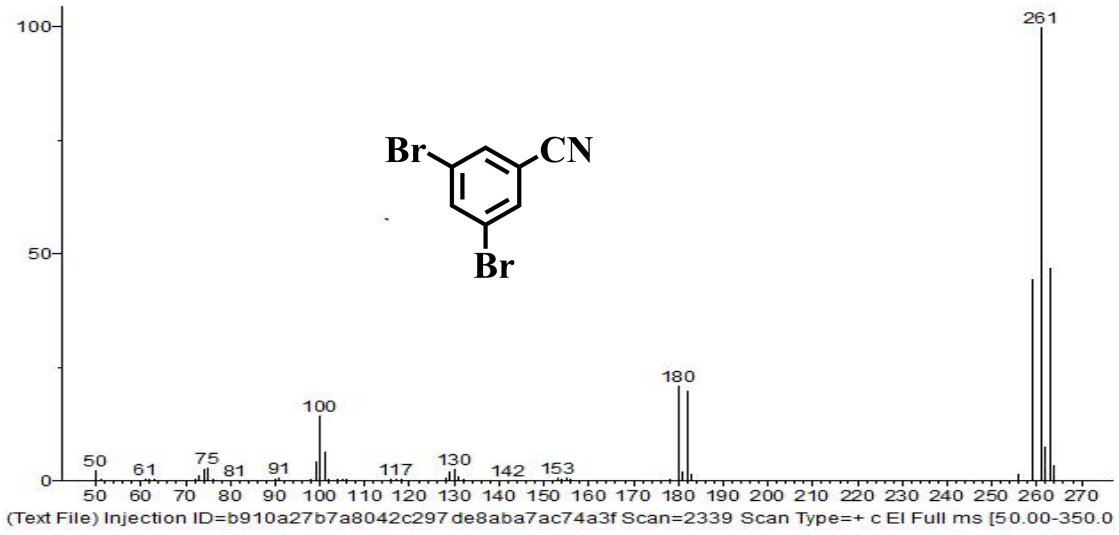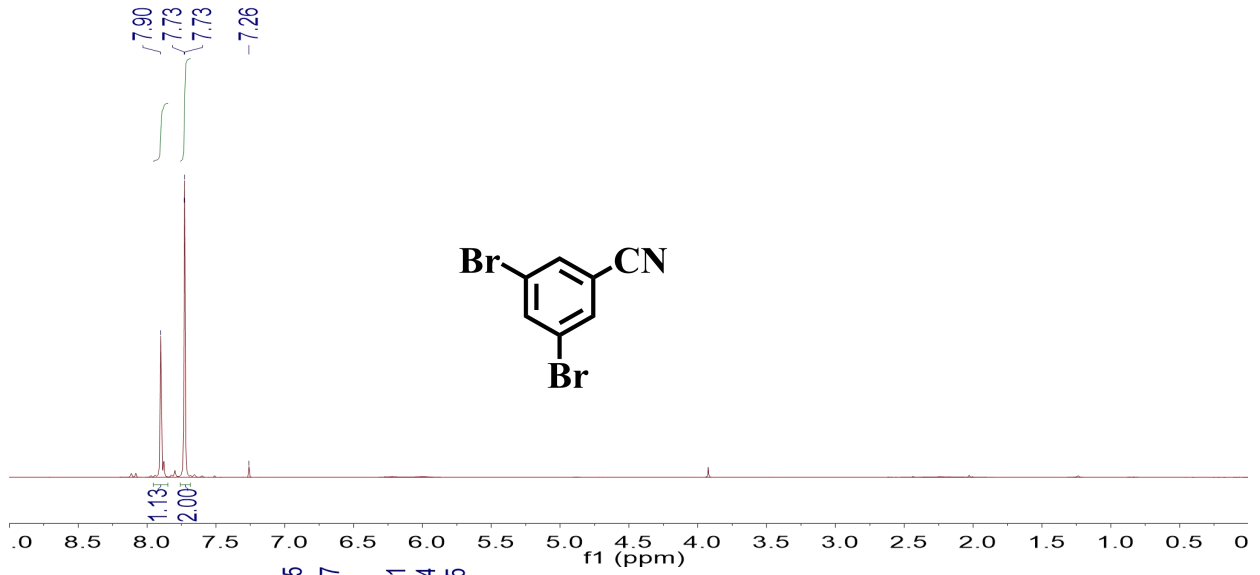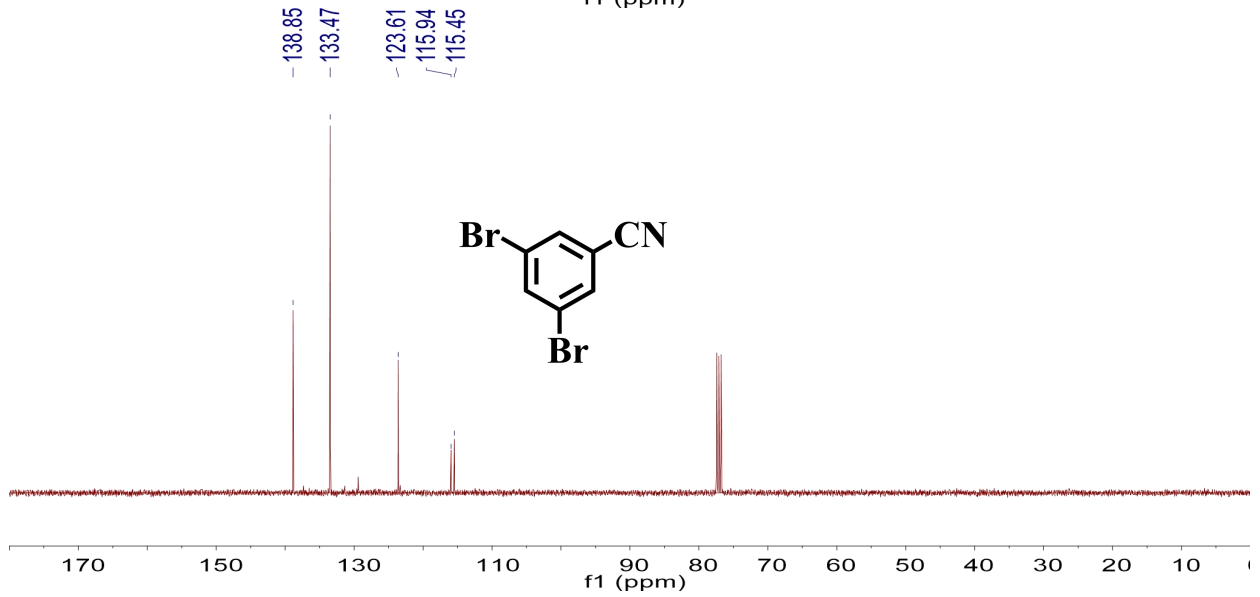

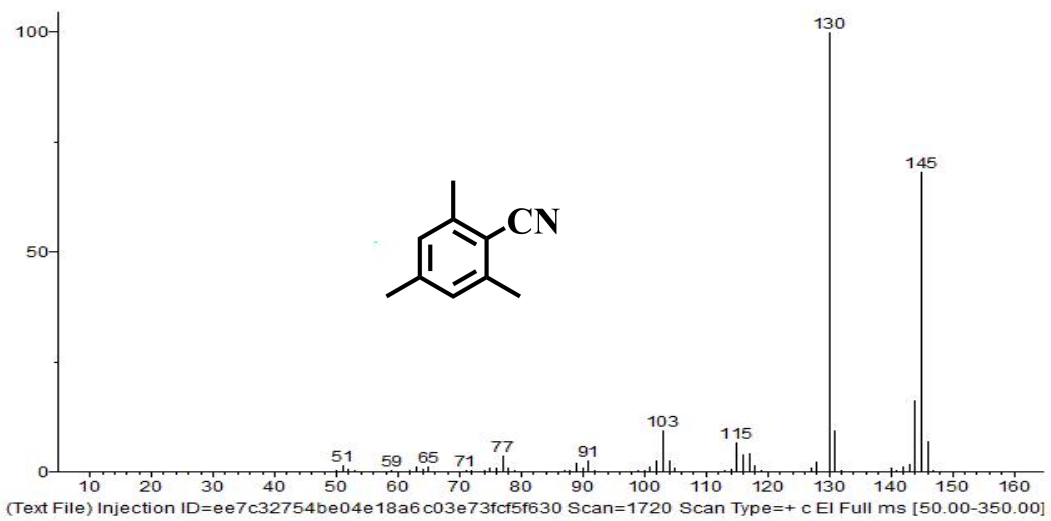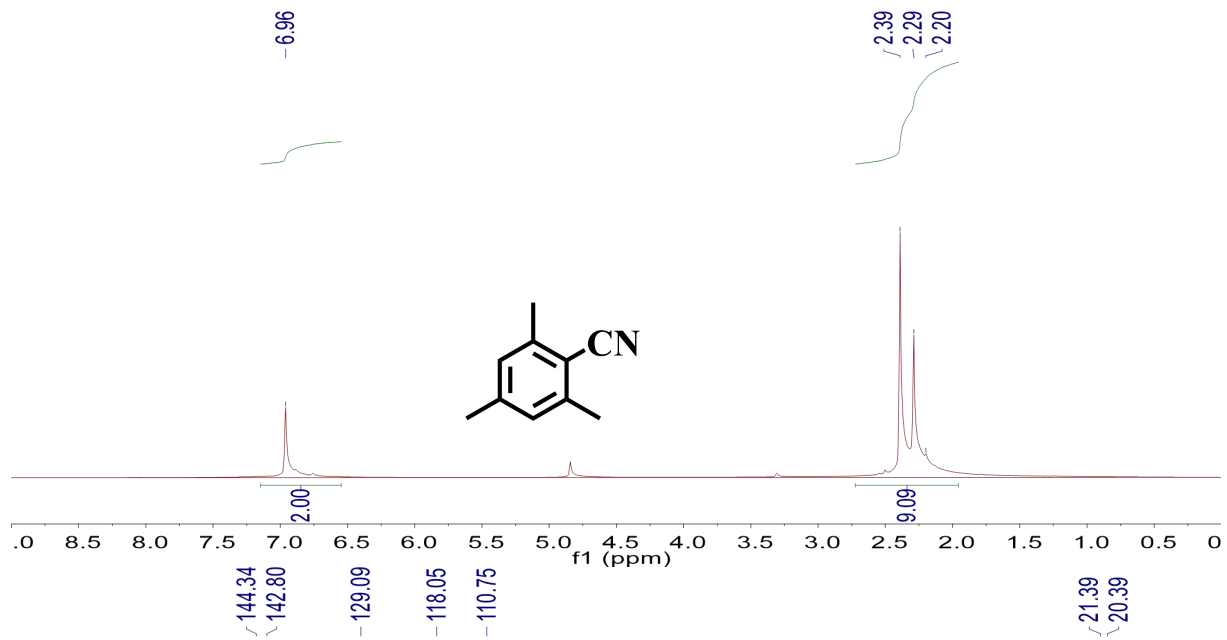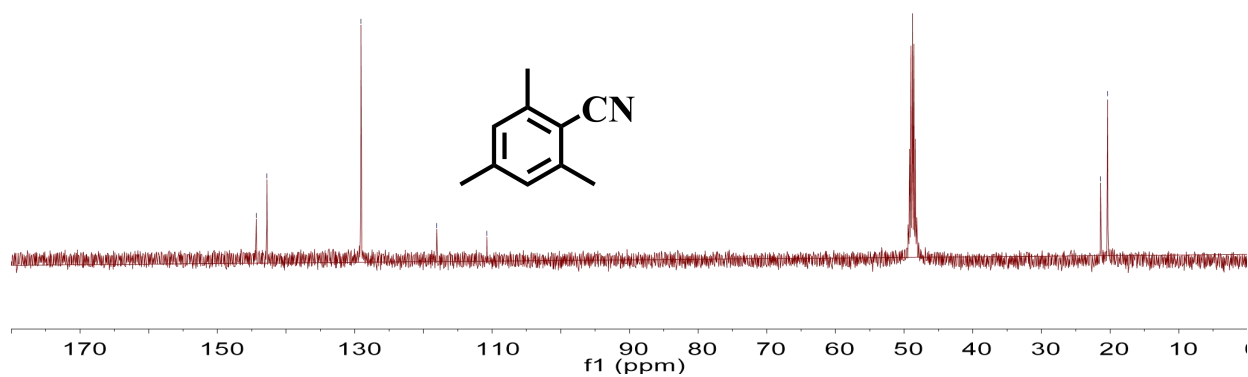

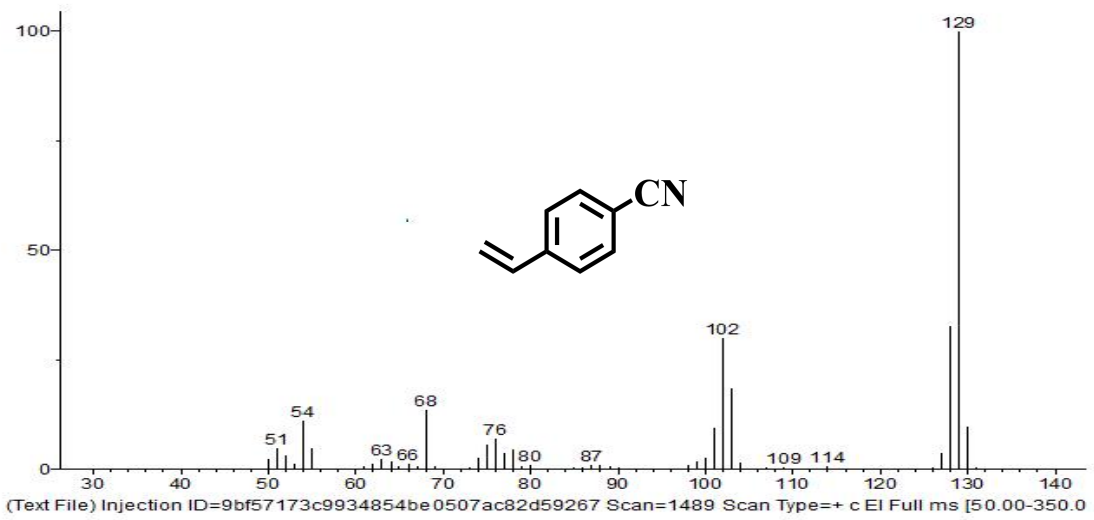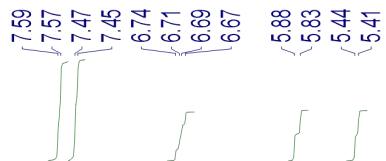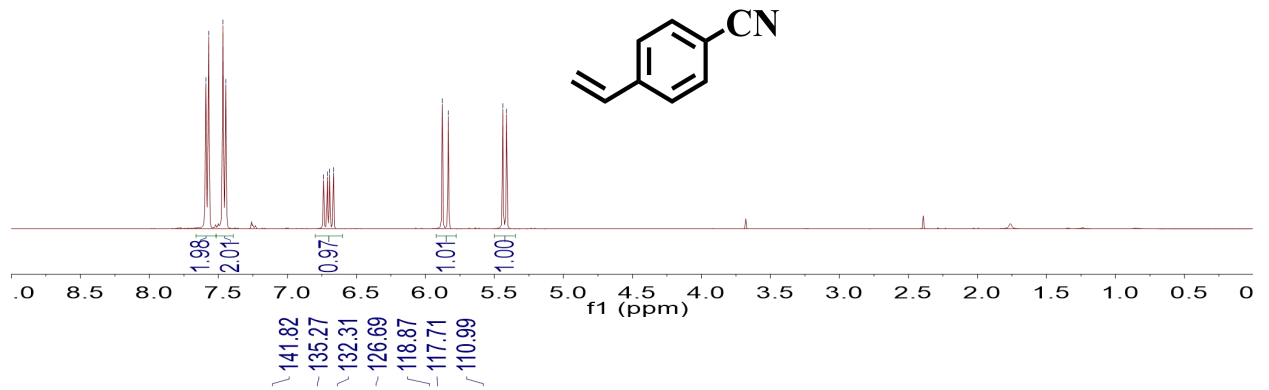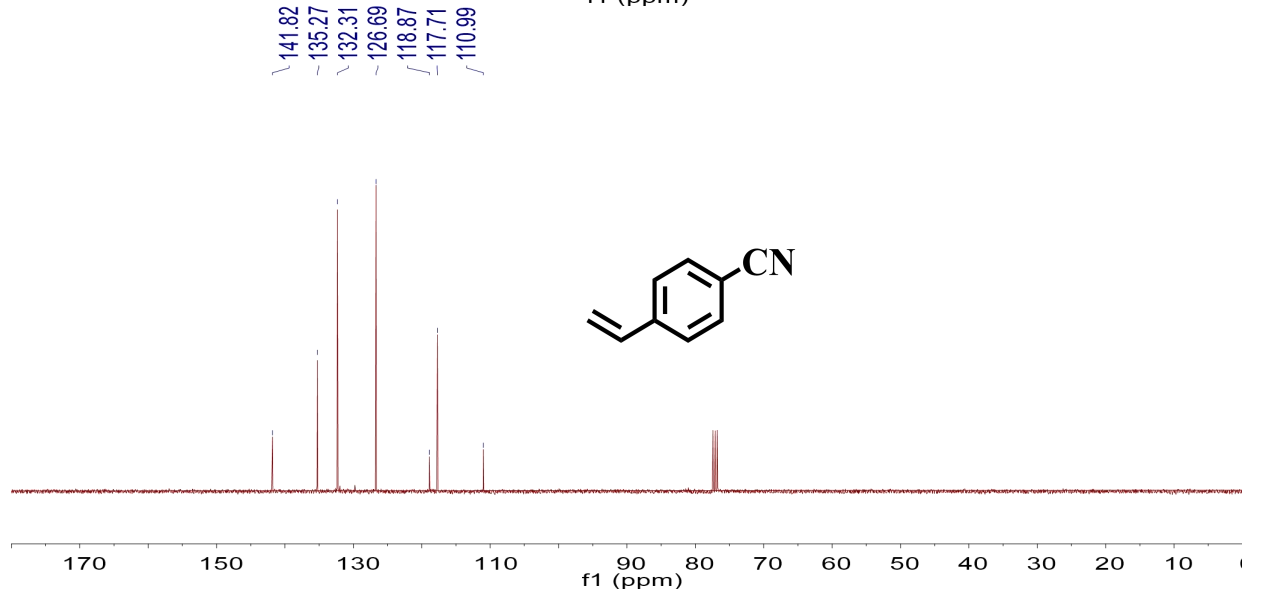

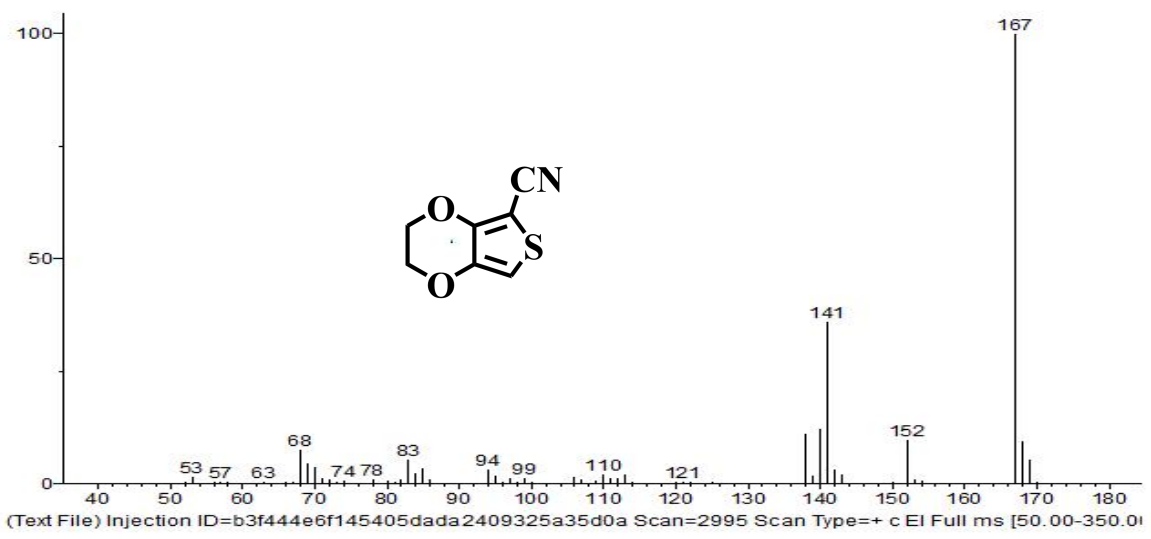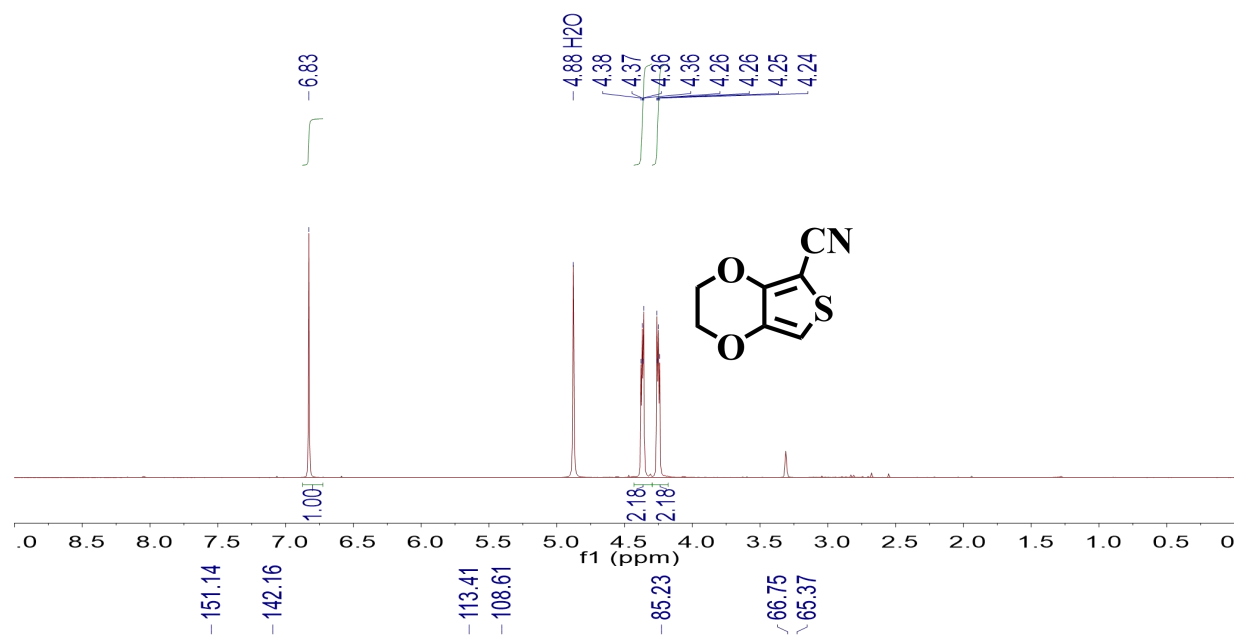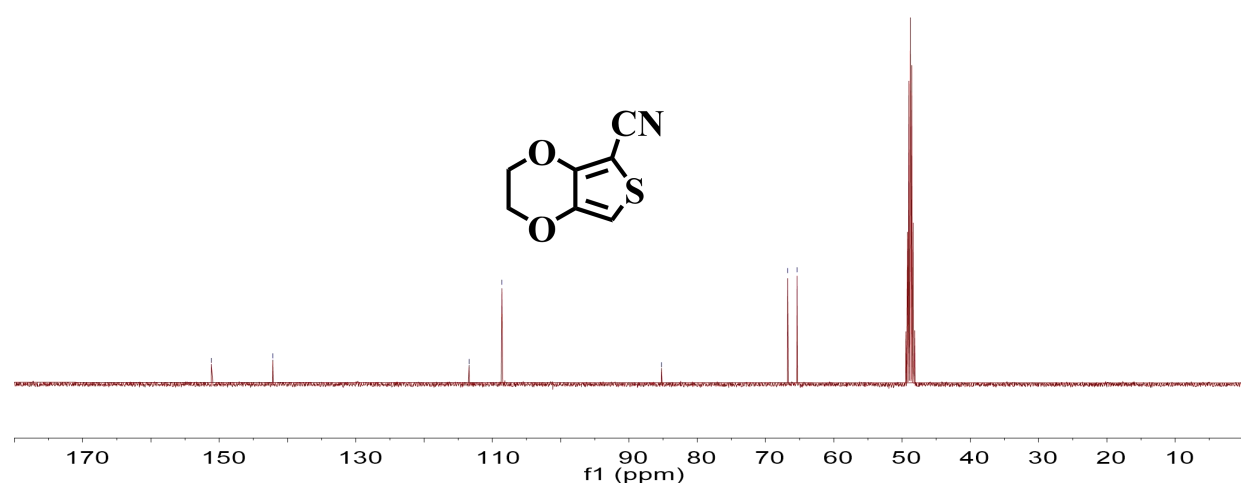



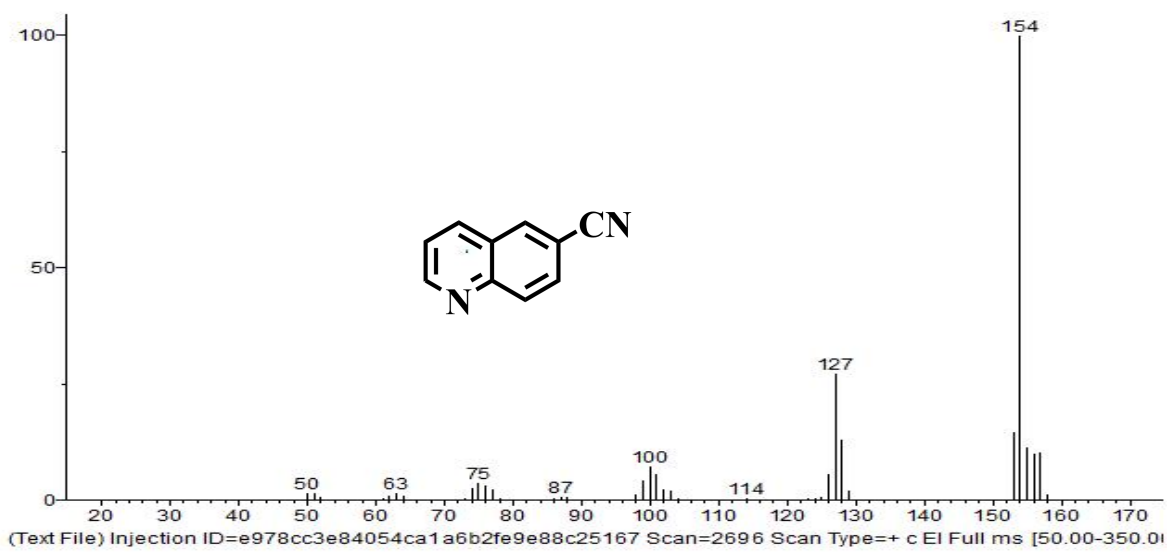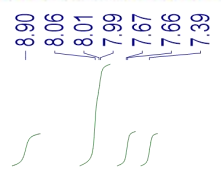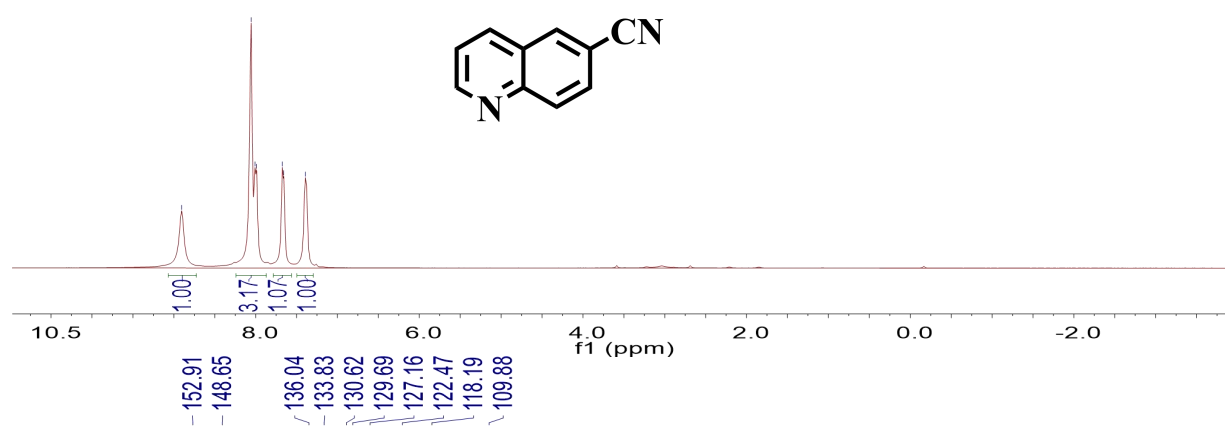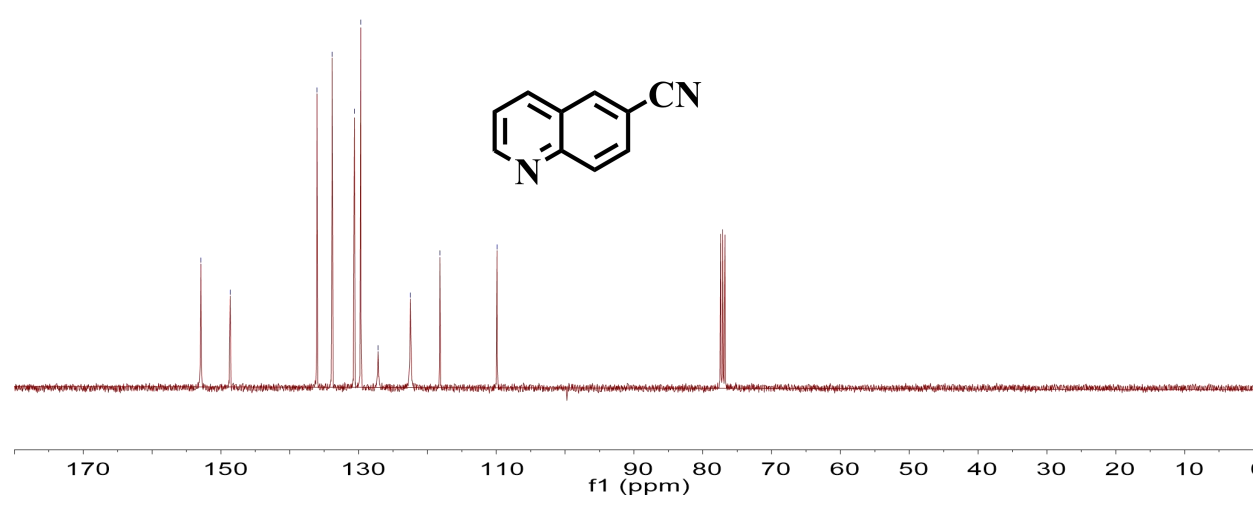

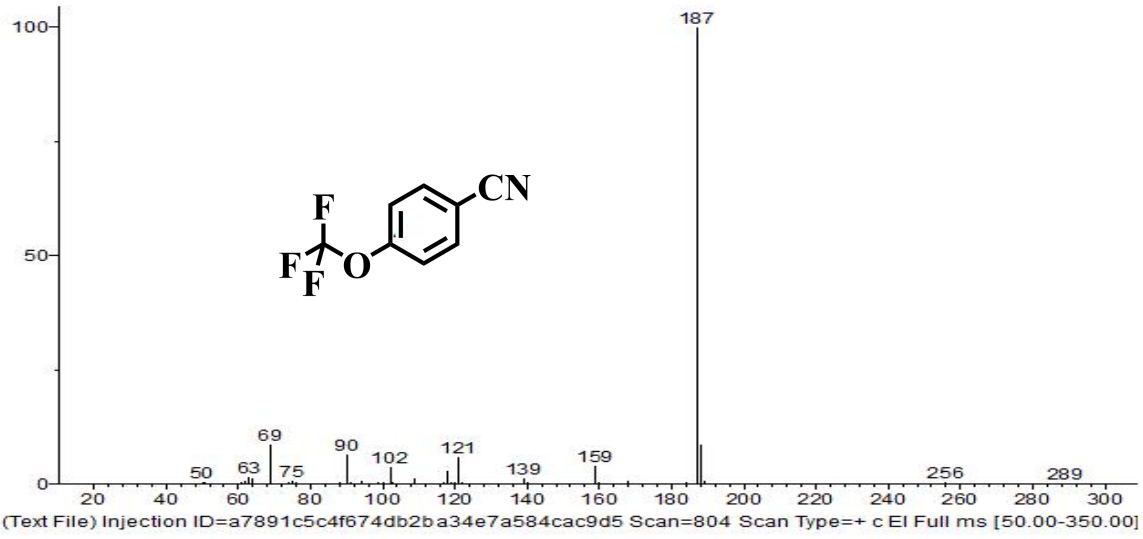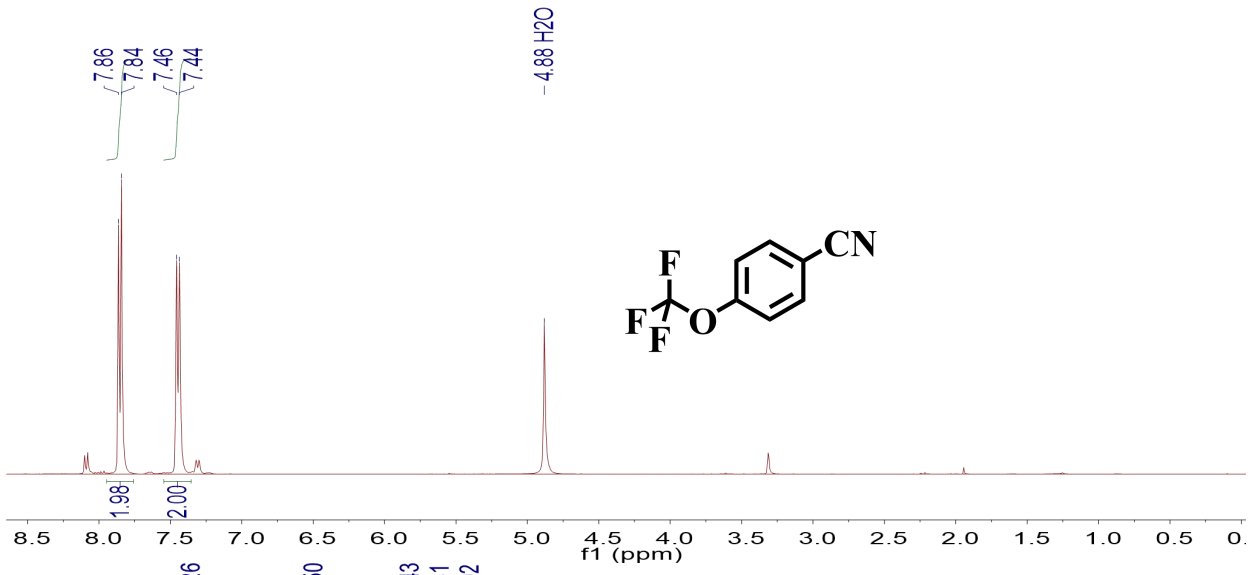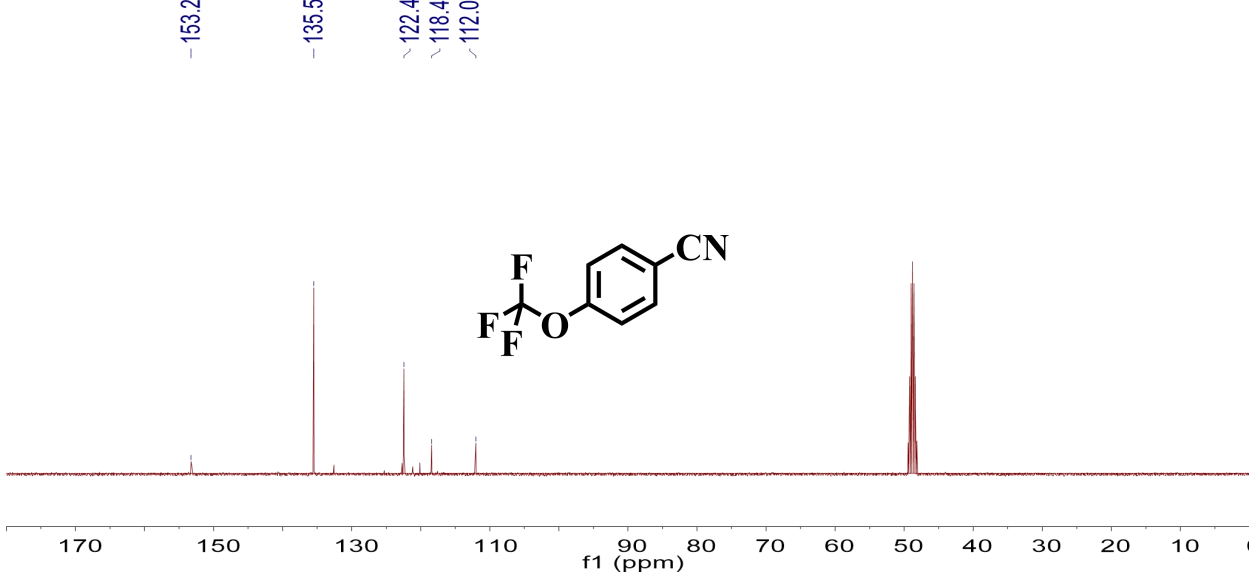

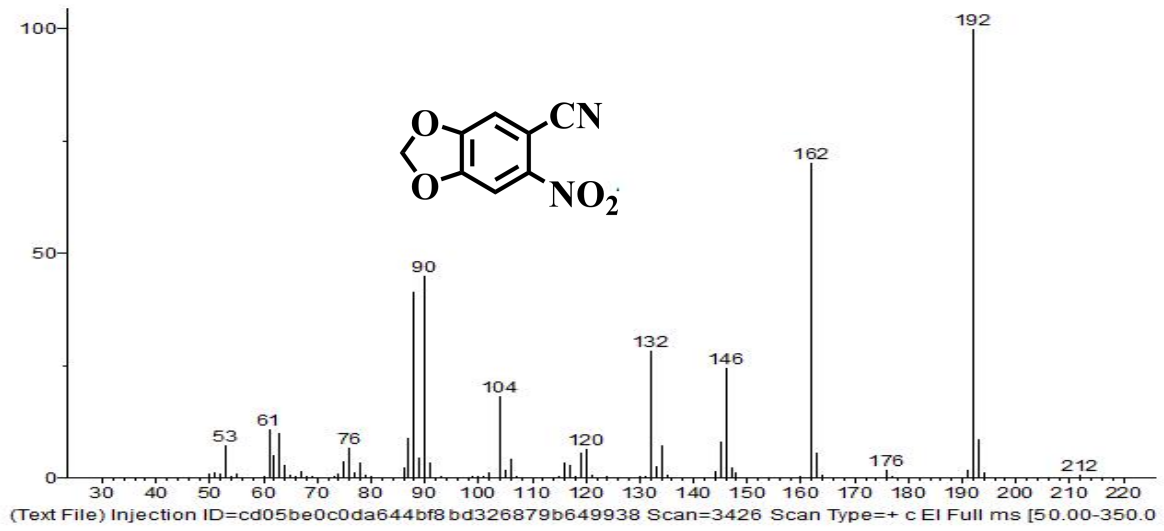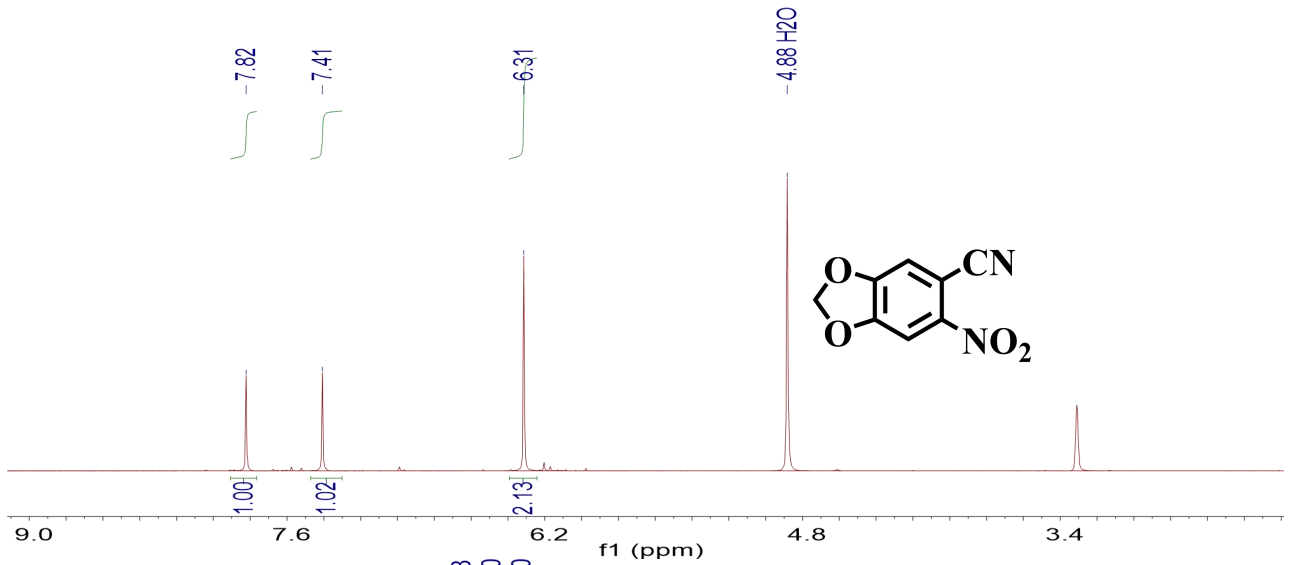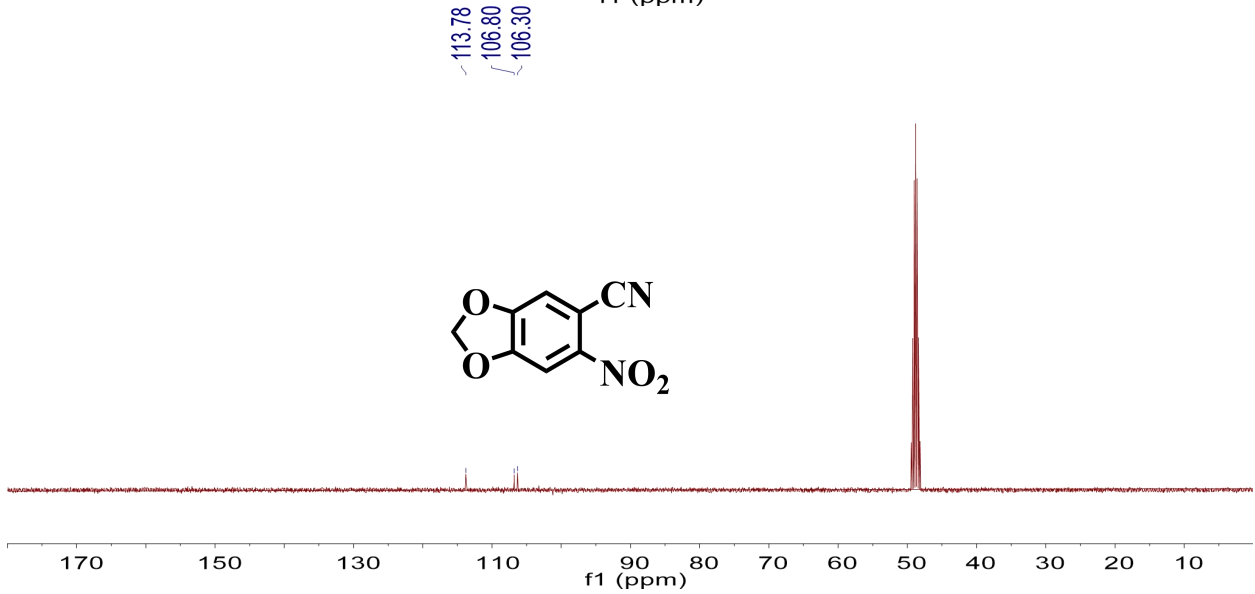

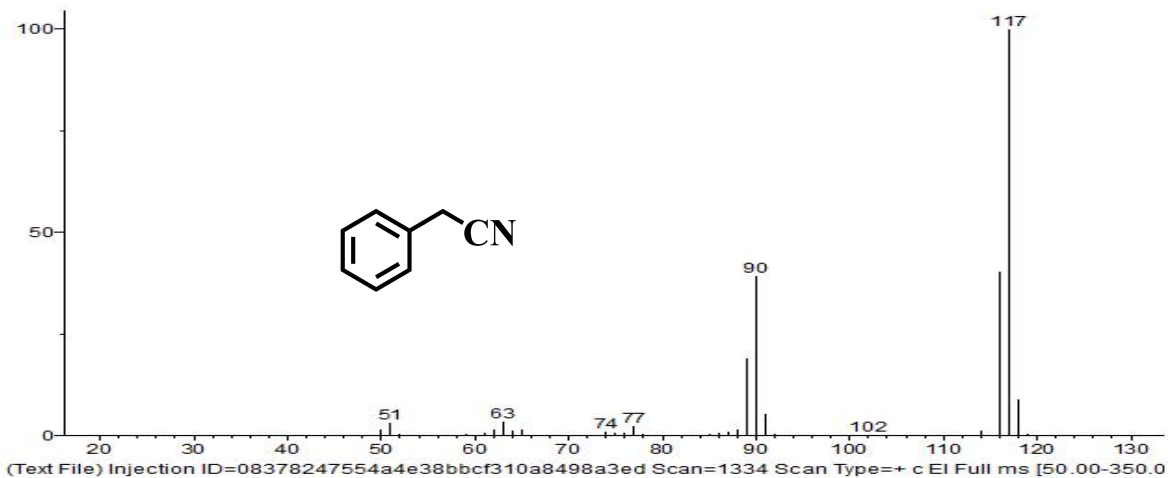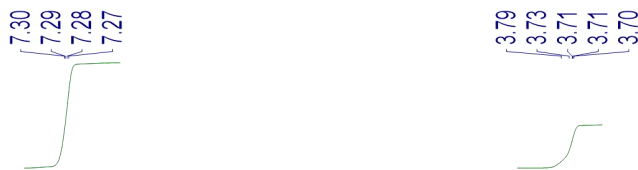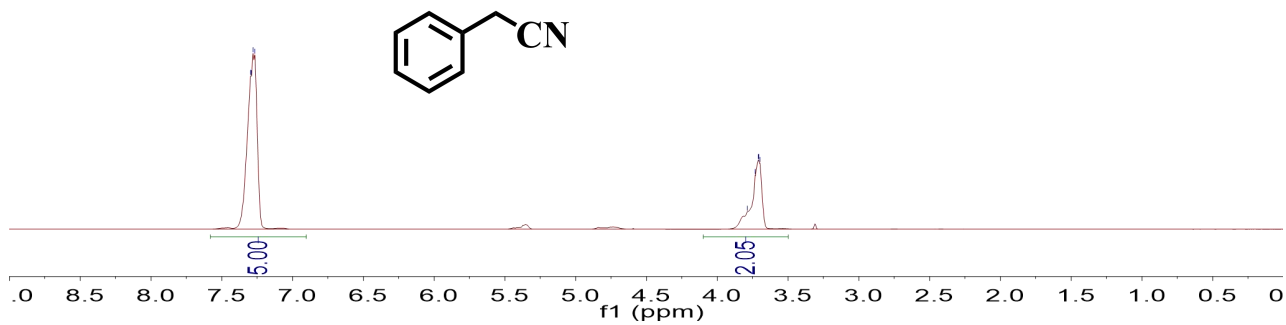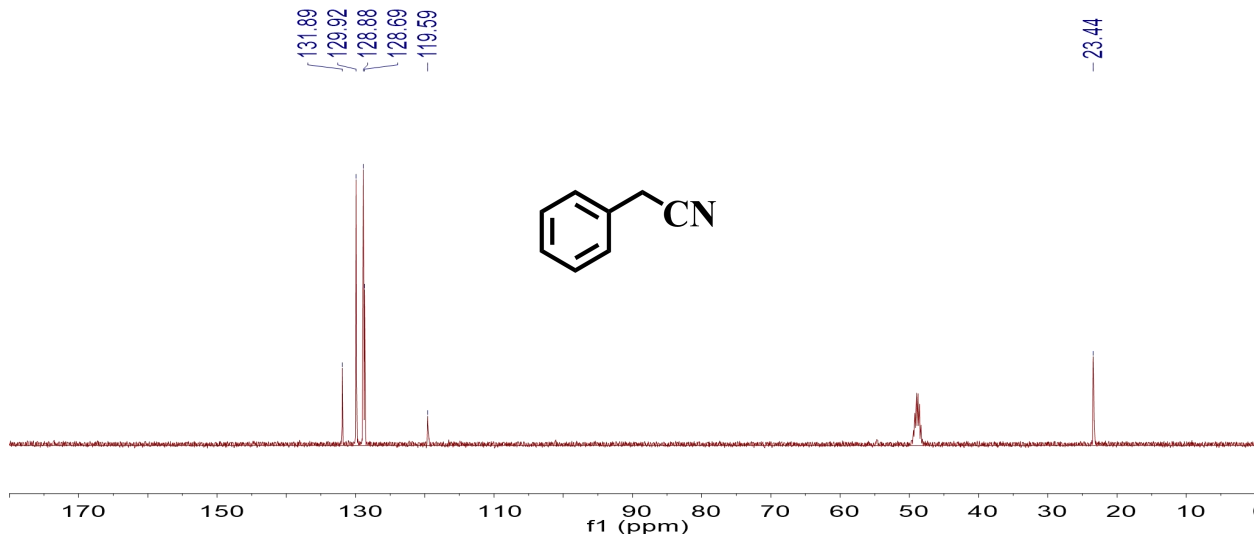

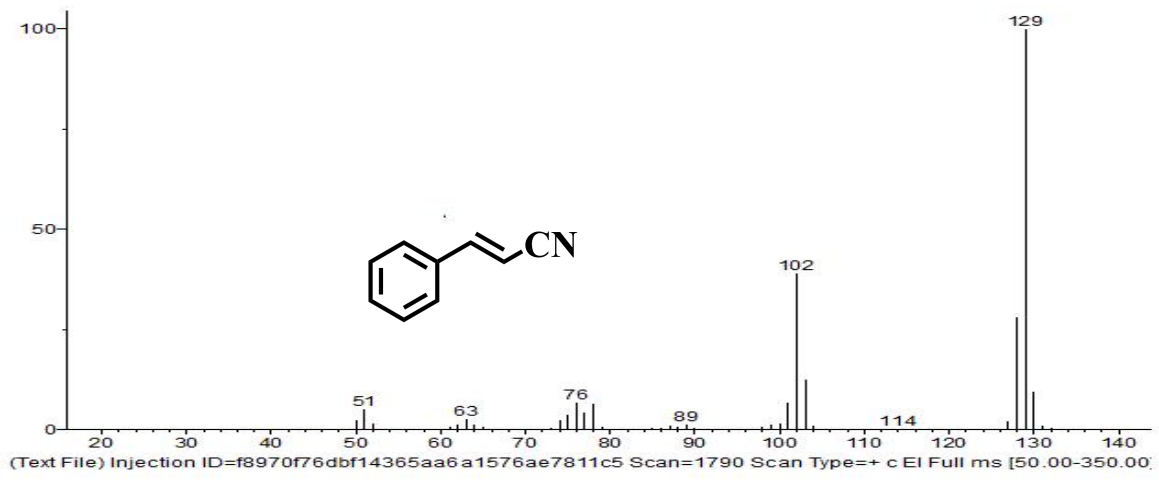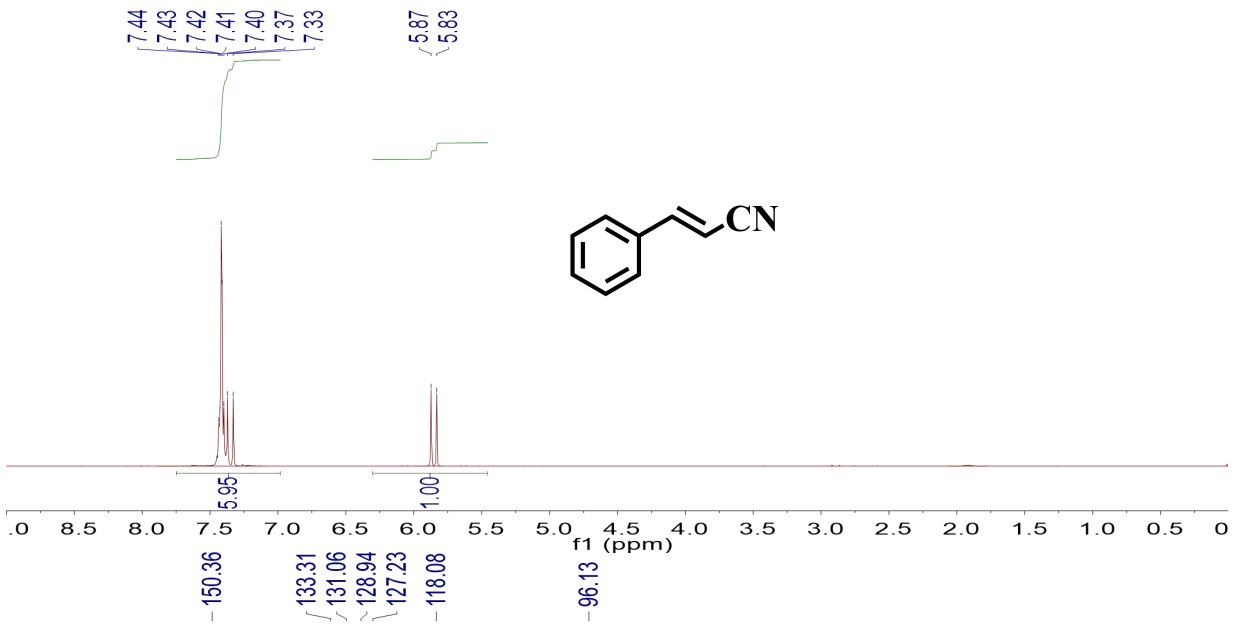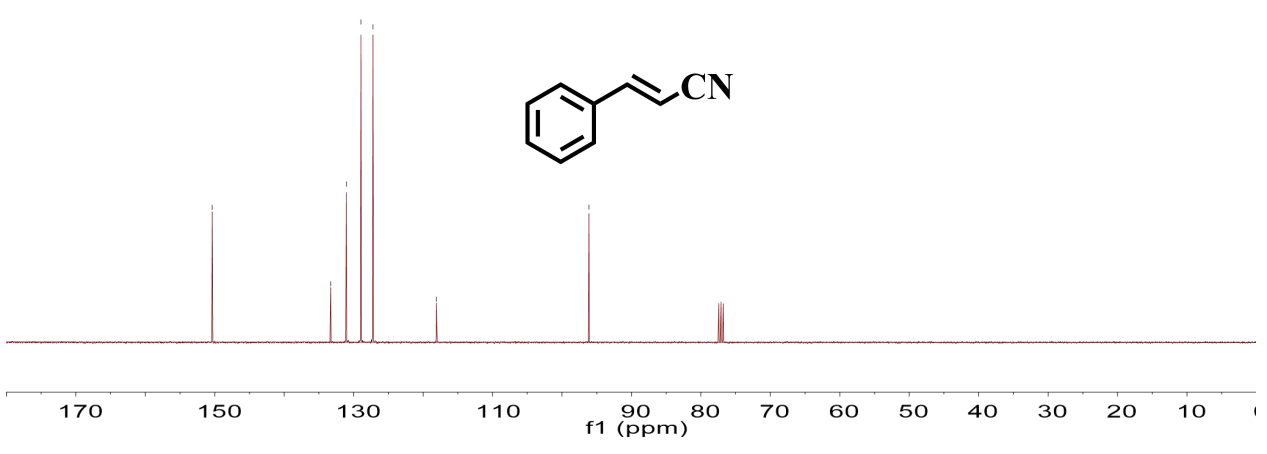

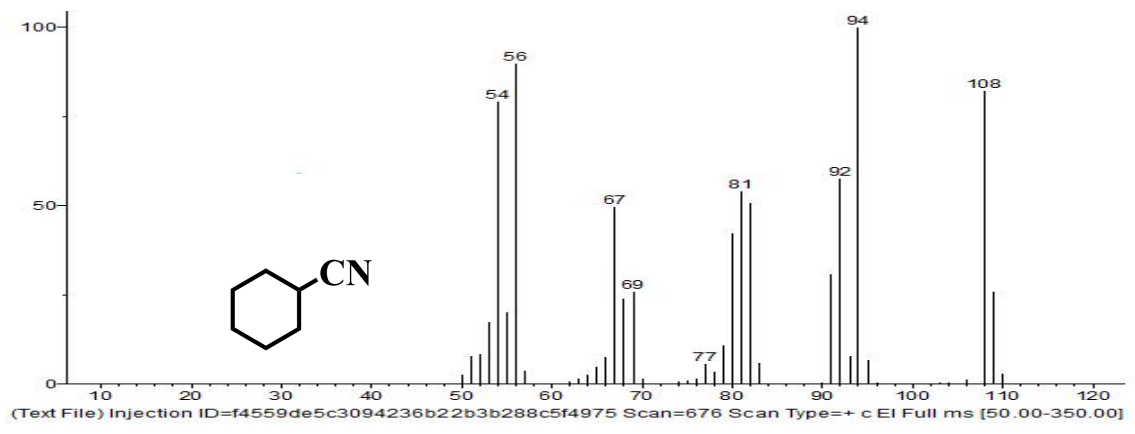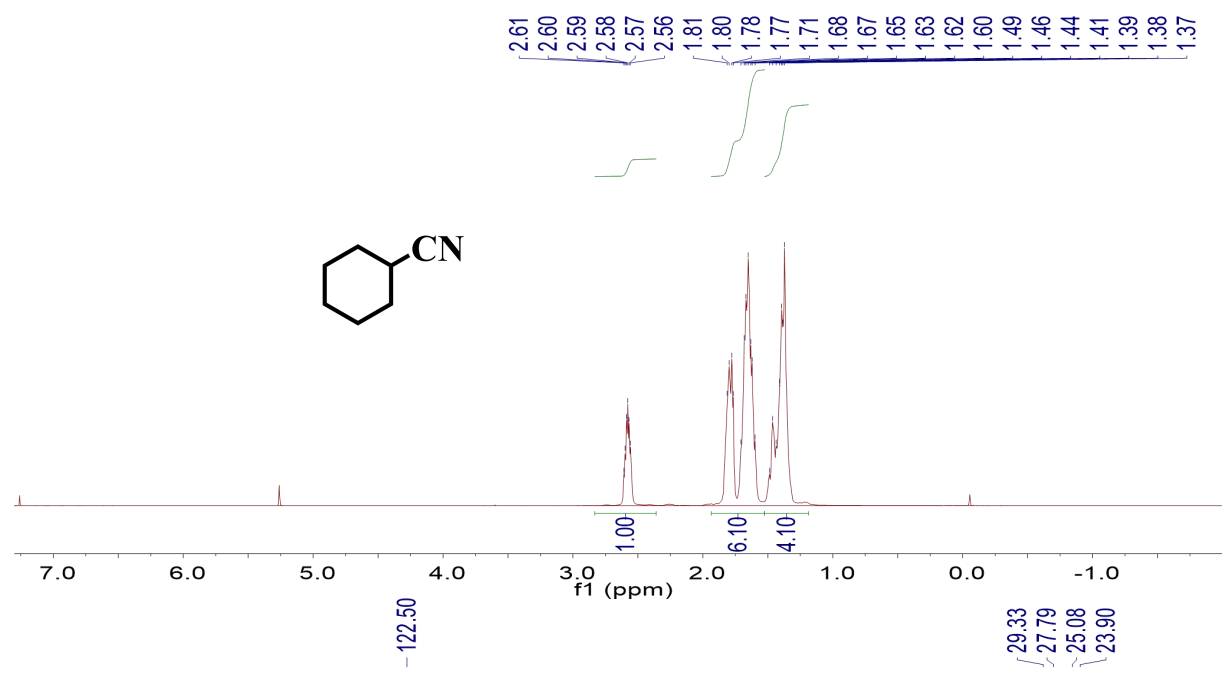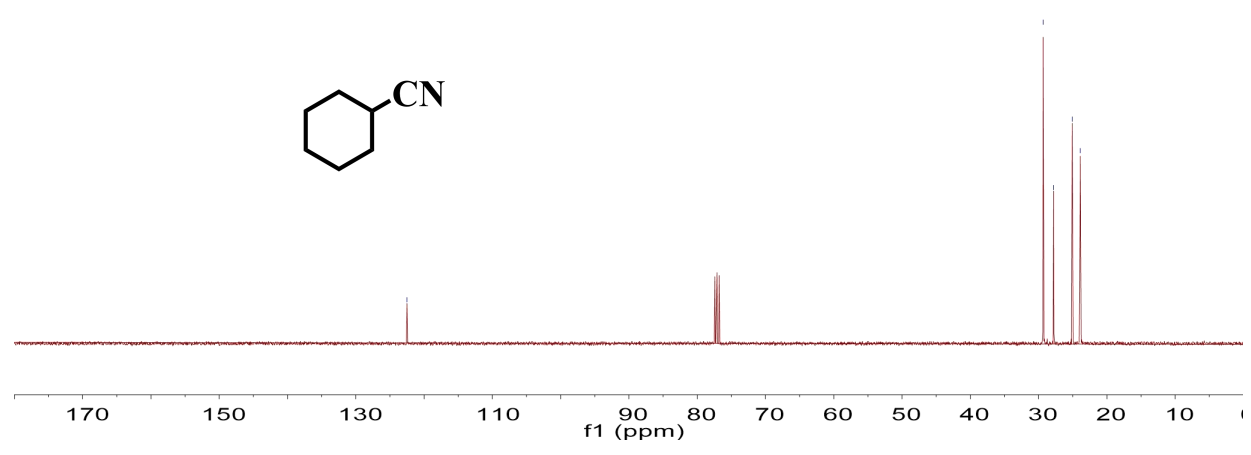

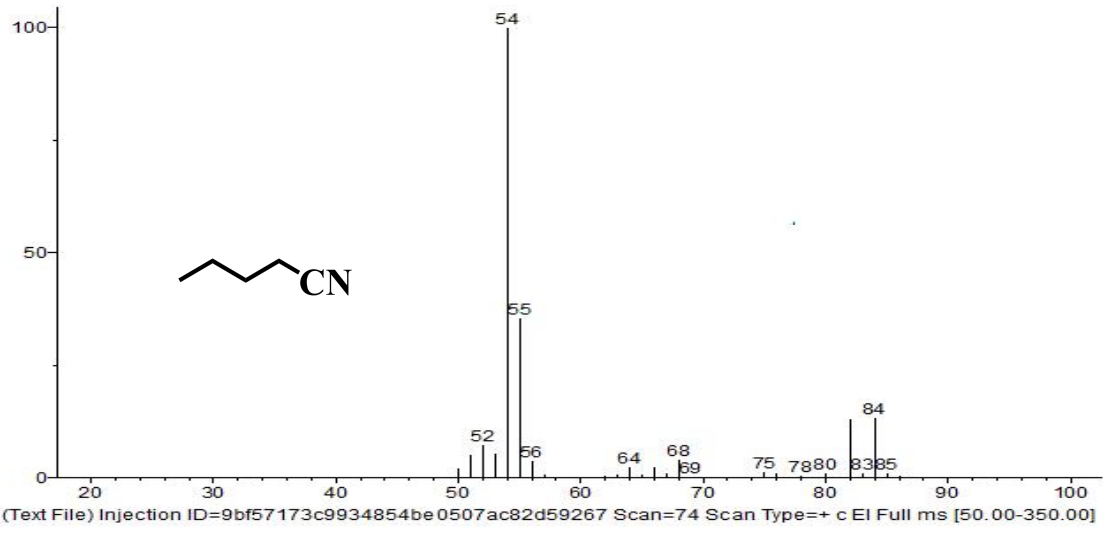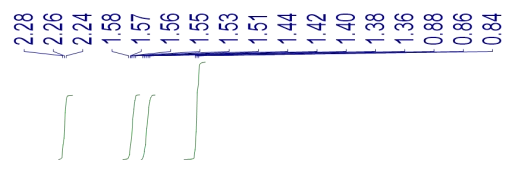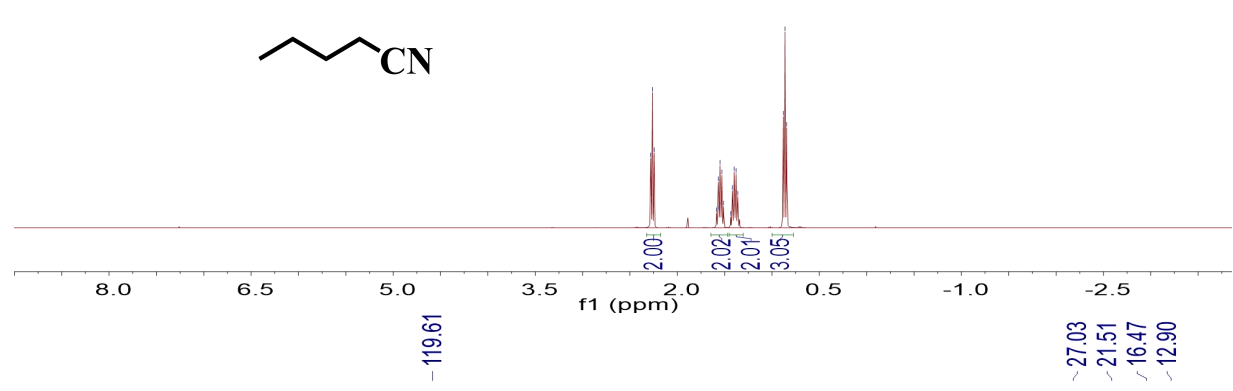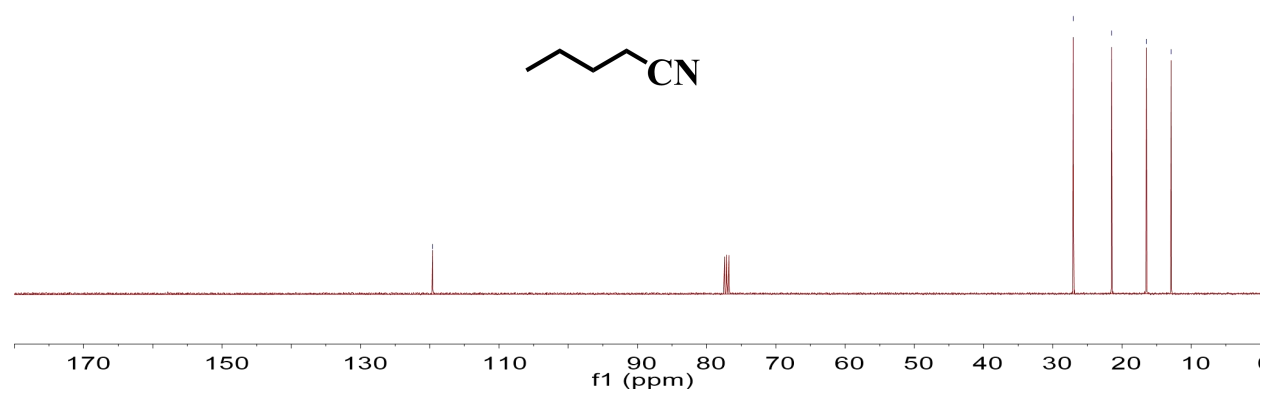

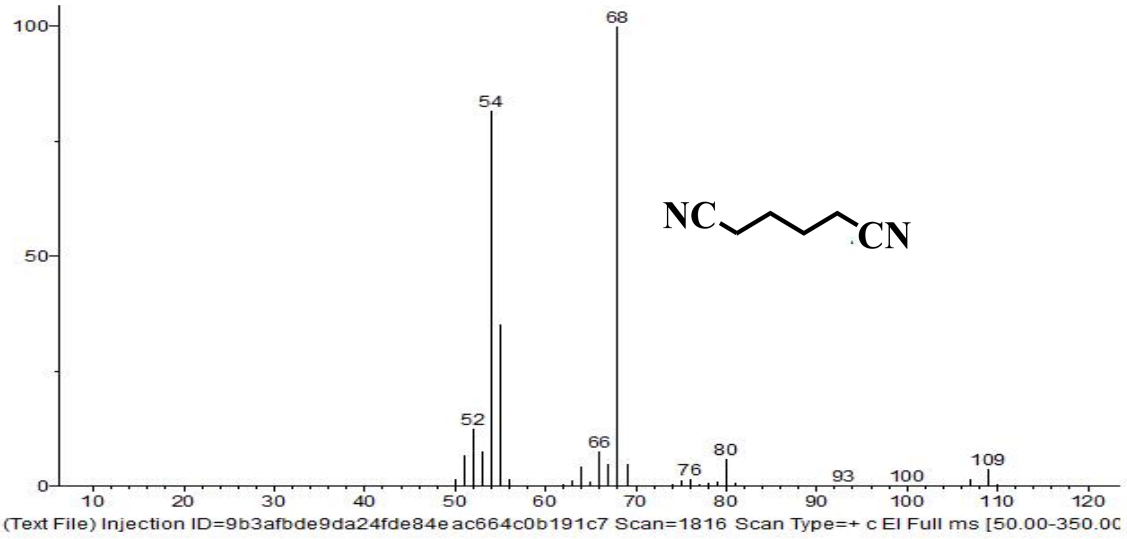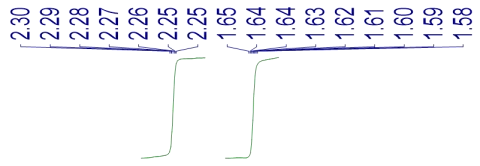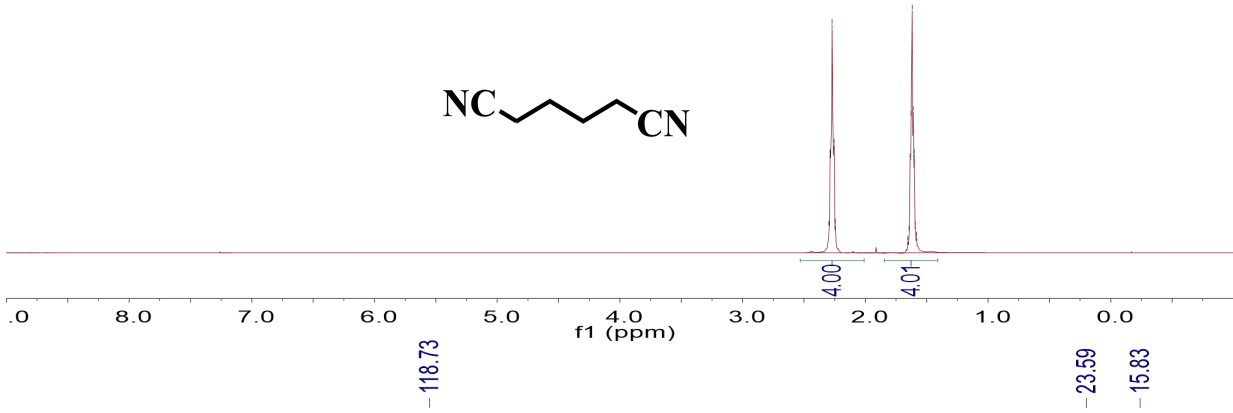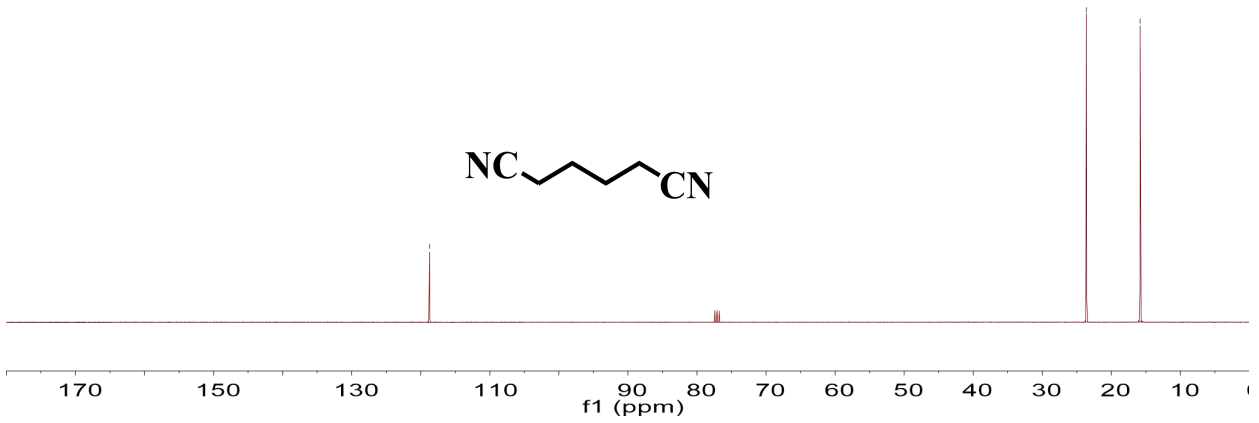



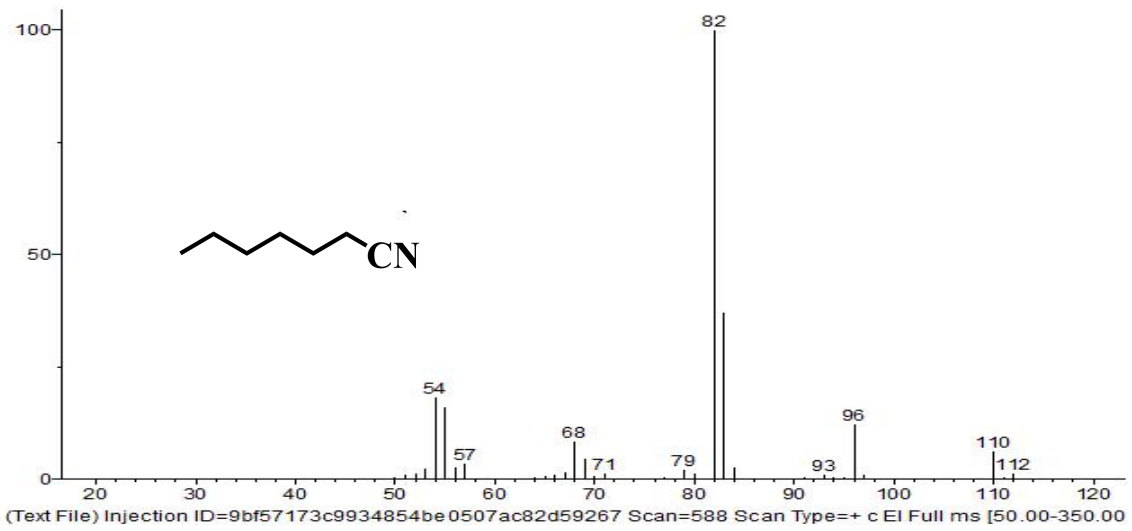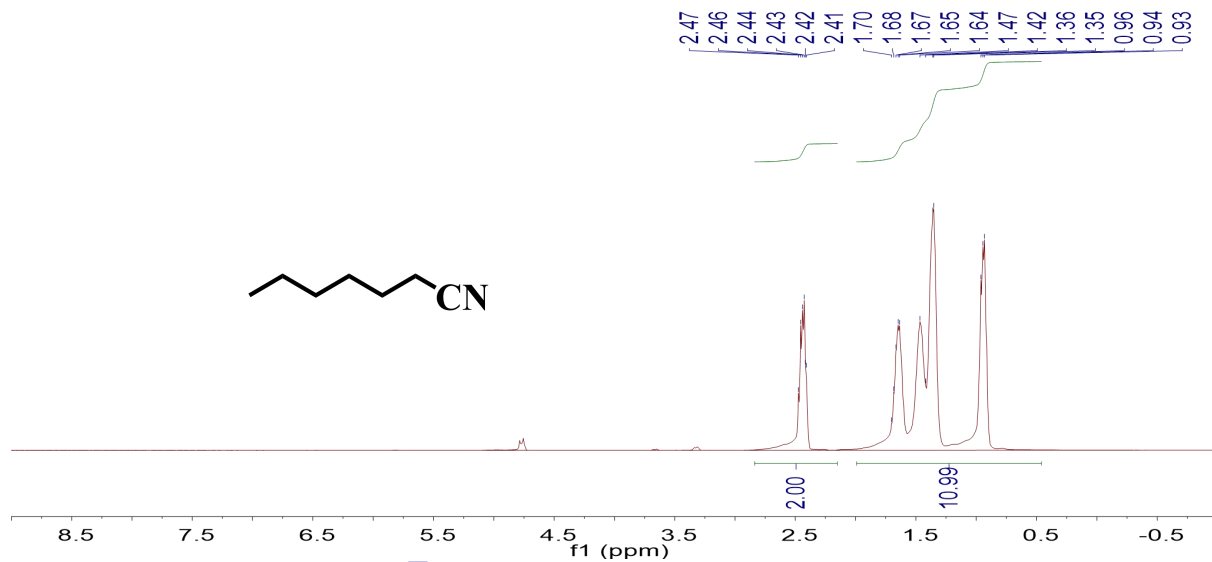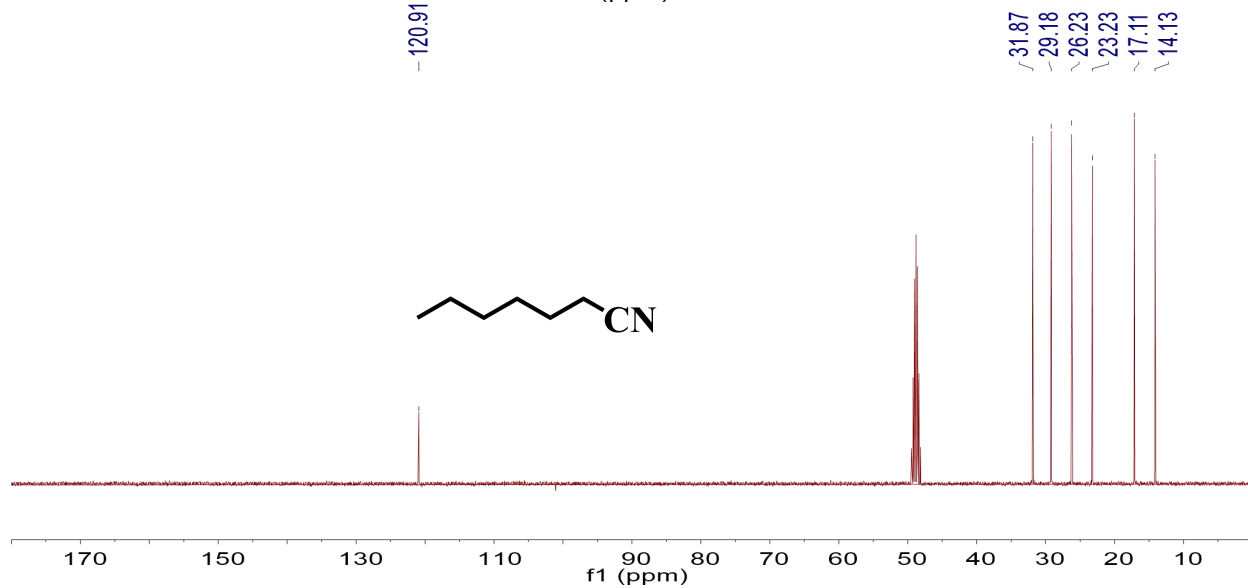

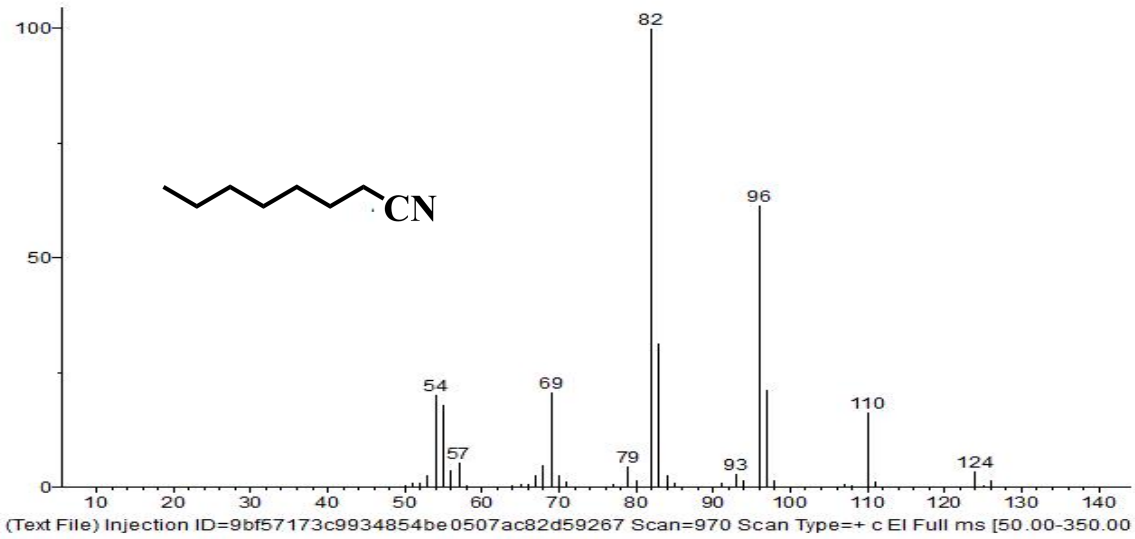

(Text File) Injection ID=9bf57173c9934854be0507ac82d59267 Scan=970 Scan Type=+ c EI Full ms [50.00-350.00]

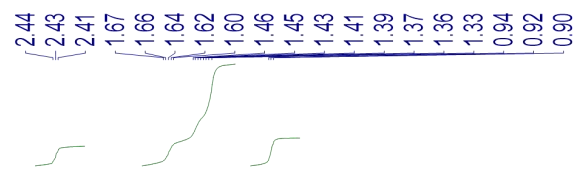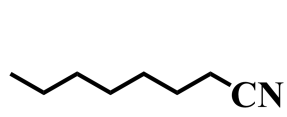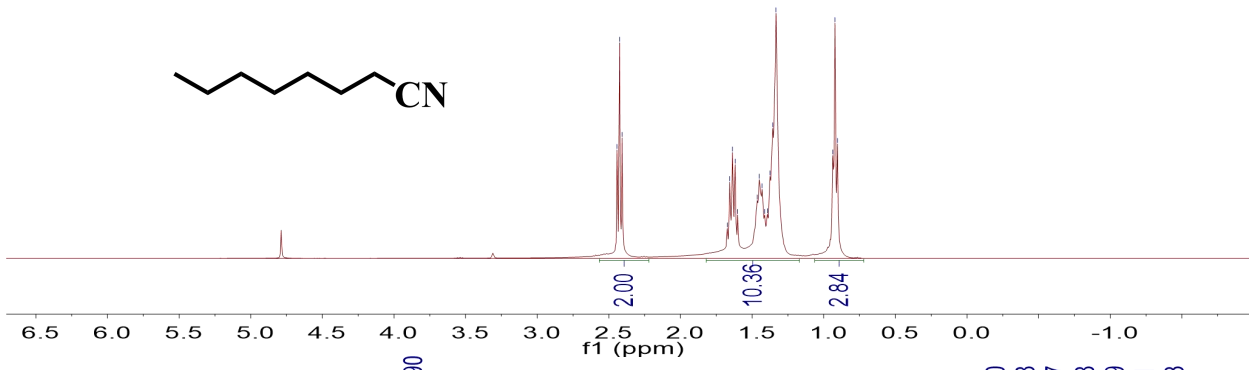

120.90, 32.50, 29.48, 29.37, 26.28, 23.39, 17.11, 14.23

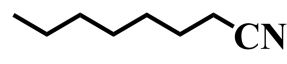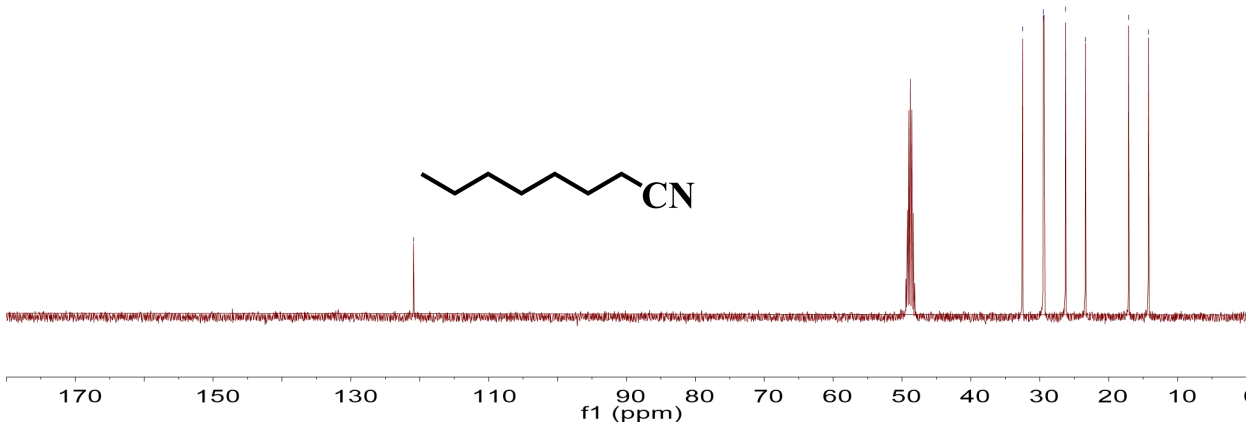

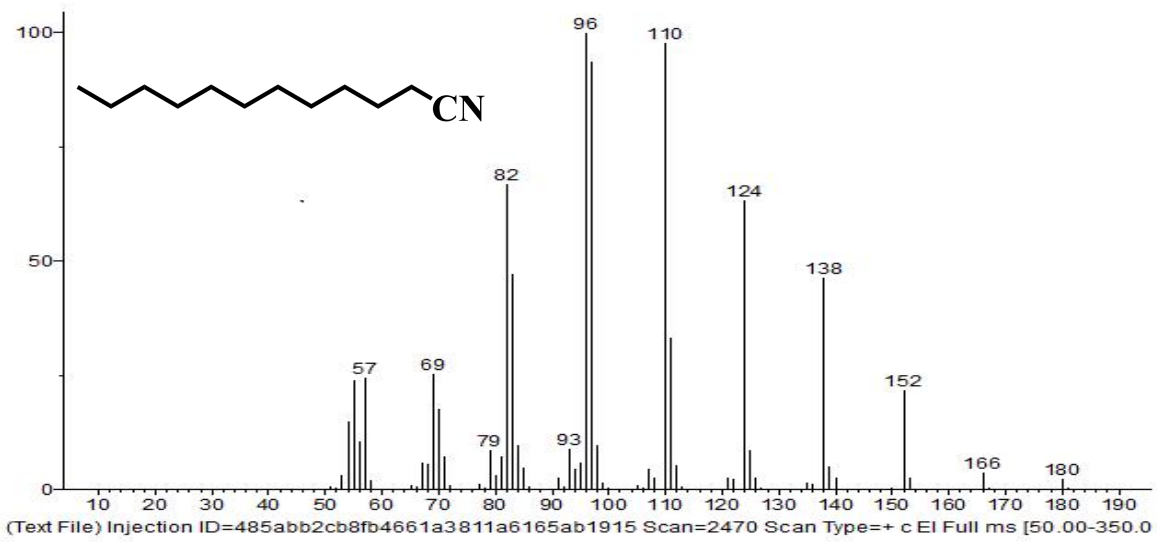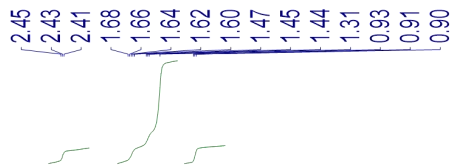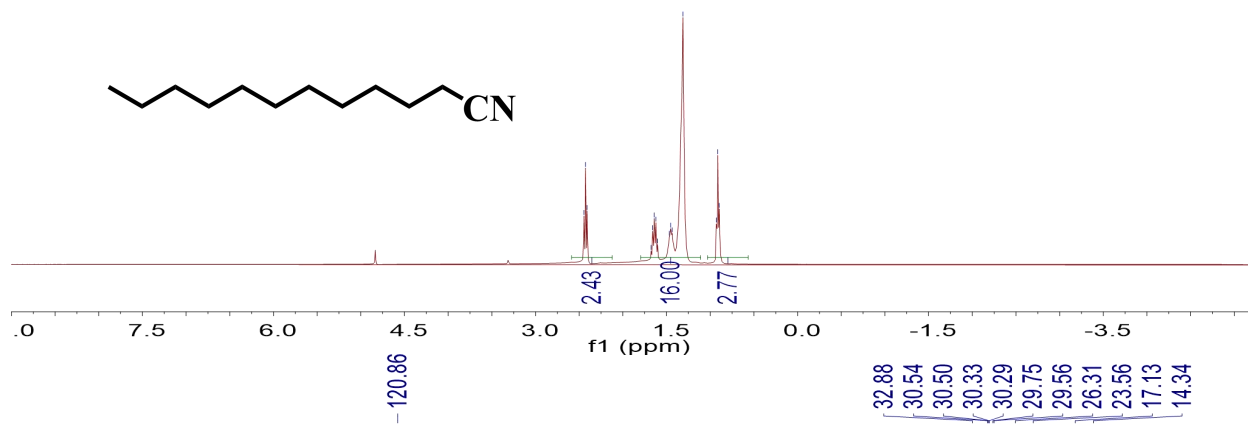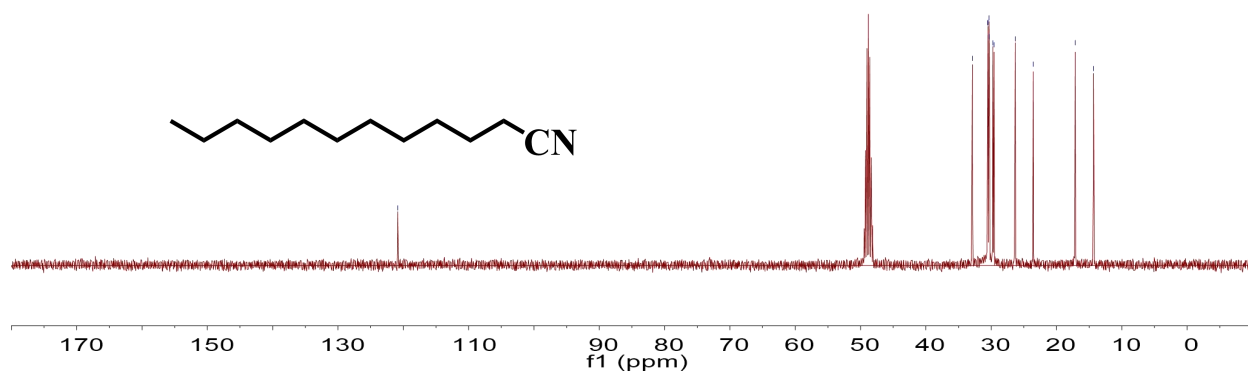

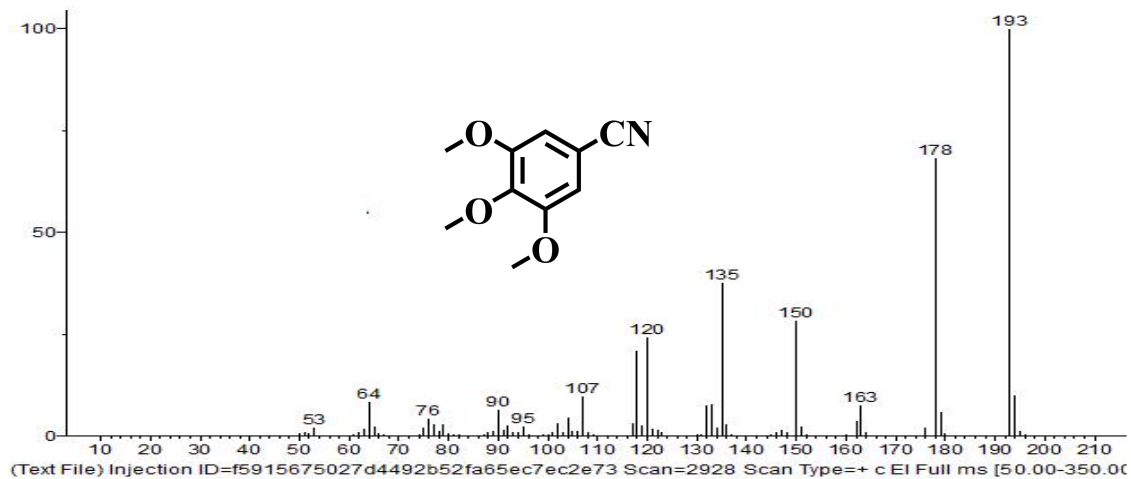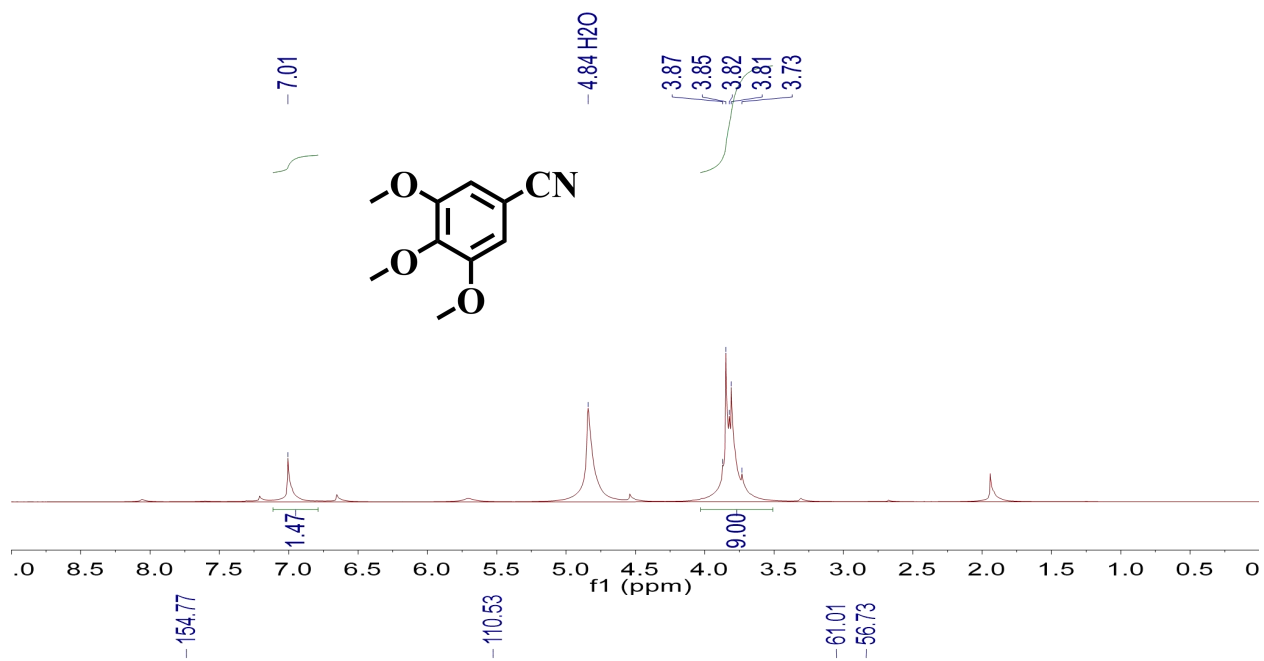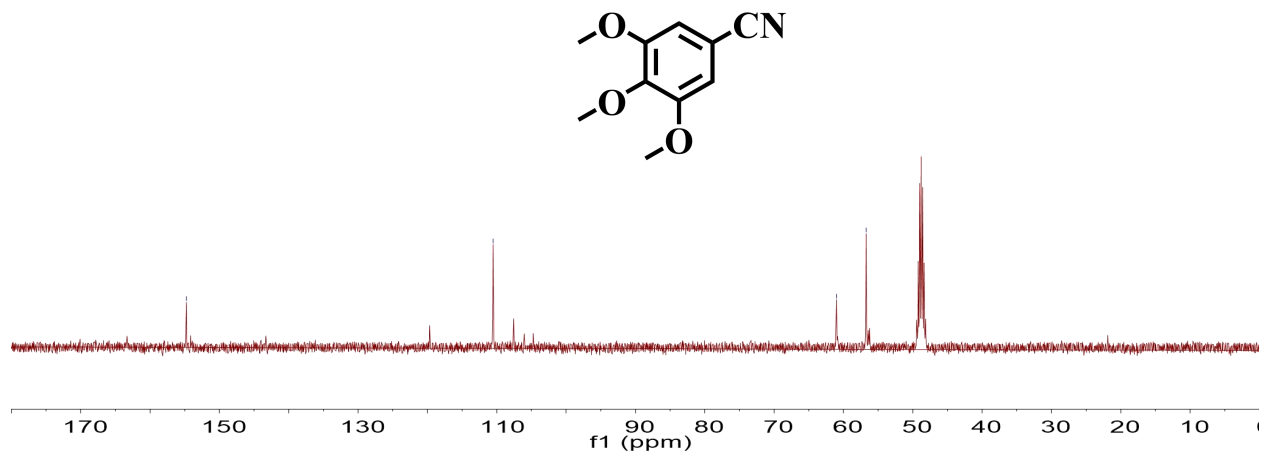

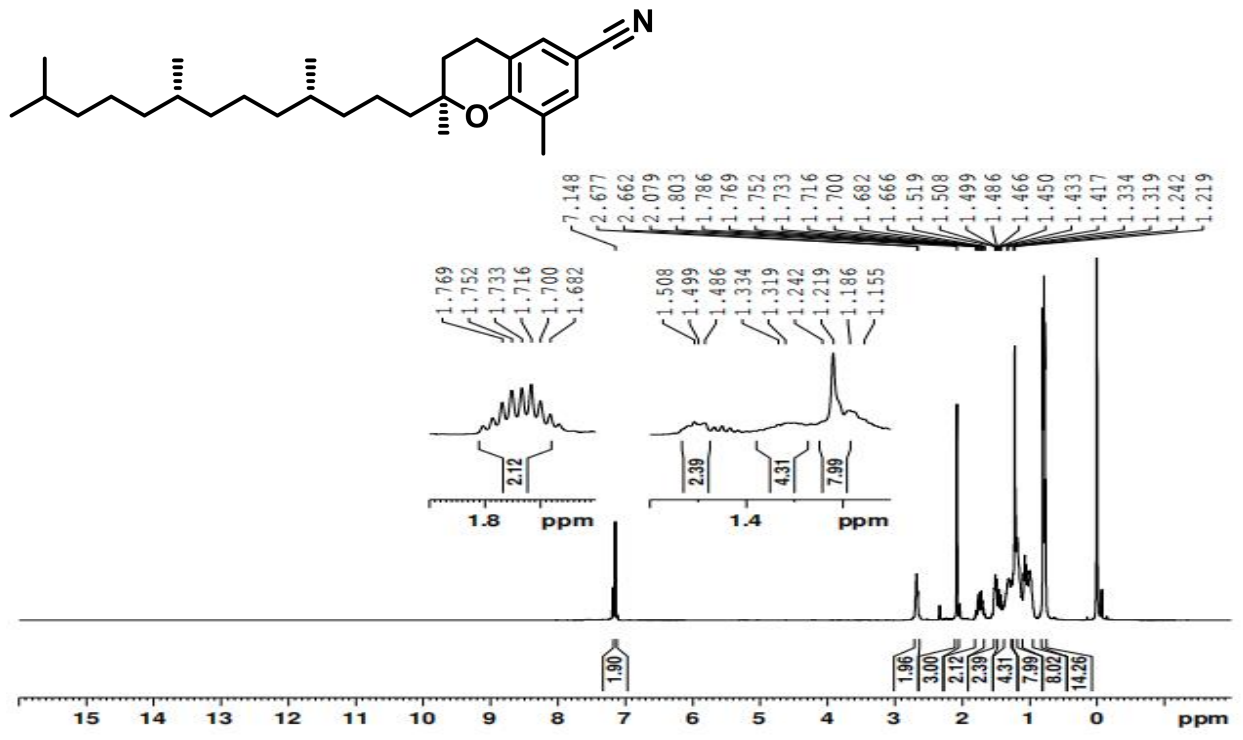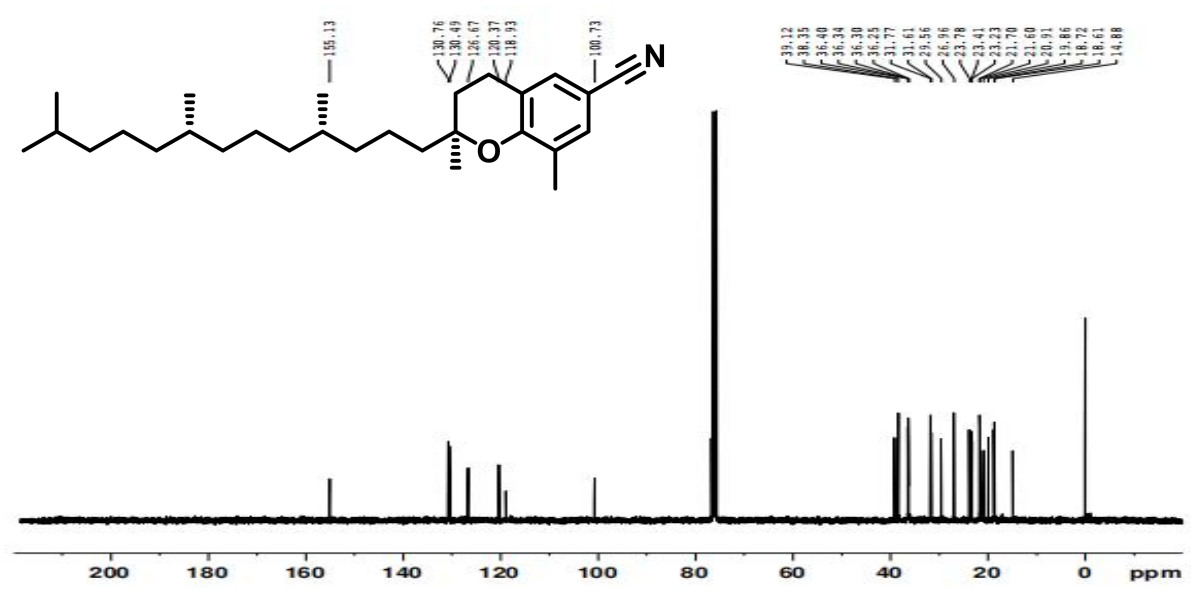

Supplement: sciadv.add1267_sm.pdf [file sciadv.add1267_sm.pdf]
